# Supplementary material for: Association between cumulative anticholinergic burden and falls and fractures in patients with overactive bladder: US-based retrospective cohort study
Source: PubMed Central journal article supplement — BMJ Open. 2019 May 5;9(5):e026391. doi: 10.1136/bmjopen-2018-026391 (PMC6502005; doi:10.1136/bmjopen-2018-026391), 2019-05-05
Supplement: bmjopen-2018-026391.draft_revisions.pdf [file bmjopen-2018-026391.draft_revisions.pdf]

# BMJ Open

BMJ Open is committed to open peer review. As part of this commitment we make the peer review history of every article we publish publicly available.

When an article is published we post the peer reviewers' comments and the authors' responses online. We also post the versions of the paper that were used during peer review. These are the versions that the peer review comments apply to.

The versions of the paper that follow are the versions that were submitted during the peer review process. They are not the versions of record or the final published versions. They should not be cited or distributed as the published version of this manuscript.

BMJ Open is an open access journal and the full, final, typeset and author-corrected version of record of the manuscript is available on our site with no access controls, subscription charges or pay-per-view fees (<http://bmjopen.bmj.com>).

If you have any questions on BMJ Open's open peer review process please email [info.bmjopen@bmj.com](mailto:info.bmjopen@bmj.com)

# BMJ Open

## Cumulative anticholinergic burden is associated with falls and fractures in overactive bladder: A retrospective cohort study

|                               |                                                                                                                                                                                                                                                                                                                                                                                                                                                                                                                                    |
|-------------------------------|------------------------------------------------------------------------------------------------------------------------------------------------------------------------------------------------------------------------------------------------------------------------------------------------------------------------------------------------------------------------------------------------------------------------------------------------------------------------------------------------------------------------------------|
| Journal:                      | <i>BMJ Open</i>                                                                                                                                                                                                                                                                                                                                                                                                                                                                                                                    |
| Manuscript ID                 | bmjopen-2018-026391                                                                                                                                                                                                                                                                                                                                                                                                                                                                                                                |
| Article Type:                 | Research                                                                                                                                                                                                                                                                                                                                                                                                                                                                                                                           |
| Date Submitted by the Author: | 30-Aug-2018                                                                                                                                                                                                                                                                                                                                                                                                                                                                                                                        |
| Complete List of Authors:     | Szabo, Shelagh M; Broadstreet HEOR, Gooch, Katherine; Astellas Pharma Global Development Inc<br>Schermer, Carol; Astellas Pharma Global Development Inc<br>Walker, David; Astellas Pharma Global Development Inc<br>Lozano-Ortega, G; Broadstreet Health Economics and Outcomes Research<br>Rogula, Basia; Broadstreet HEOR<br>Deighton, Alison; Broadstreet HEOR<br>Vonesh, Edward; Northwestern University Feinberg School of Medicine<br>Campbell, Noll; Purdue University College of Pharmacy, Department of Pharmacy Practice |
| Keywords:                     | Anticholinergic burden, overactive bladder, falls, fractures, observational study, marginal structural models                                                                                                                                                                                                                                                                                                                                                                                                                      |
|                               |                                                                                                                                                                                                                                                                                                                                                                                                                                                                                                                                    |

SCHOLARONE™  
Manuscripts

1  
2  
3  
4 **Cumulative anticholinergic burden is associated with falls and fractures in overactive bladder: A**  
5  
6 **retrospective cohort study**  
7

8 Shelagh M. Szabo MSc,<sup>1</sup> Katherine Gooch PhD,<sup>2</sup> Carol R. Schermer MD MPH,<sup>2</sup> David Walker PhD,<sup>2</sup>

9  
10 Greta Lozano-Ortega MSc,<sup>1</sup> Basia Rogula MSc,<sup>1</sup> Alison Deighton BAsc,<sup>1</sup> Edward Vonesh PhD,<sup>3</sup> Noll L.

11  
12 Campbell PharmD MS.<sup>4</sup>  
13  
14

15 <sup>1</sup>Broadstreet Health Economics & Outcomes Research, 301 - 343 Railway St, Vancouver, BC, V6A 1A4,  
16 Canada

17 S M Szabo, Principal and Scientific Director

18 G Lozano-Ortega, Director

19 B Rogula, Senior Statistician

20 A Deighton, Research Analyst  
21  
22

23 <sup>2</sup>Astellas Pharma Global Development Inc., 1 Astellas Way, Northbrook, IL, 60062, USA

24 K Gooch, Senior Director

25 C Schermer, Medical Director

26 D Walker, Director  
27  
28

29 <sup>3</sup>Department of Preventive Medicine, Feinberg School of Medicine, 420 E Superior St, Chicago, IL  
30 60611, USA

31 E Vonesh, Adjunct Professor  
32  
33

34 <sup>4</sup>College of Pharmacy, Purdue University, 575 Stadium Mall Drive, West Lafayette, IN 47907, USA

35 N Campbell, Assistant Professor  
36  
37  
38  
39

40 **Corresponding author:**  
41

42 Shelagh M. Szabo

43 Telephone: 604 800 0648

44 Email: [sszabo@broadstreetheor.com](mailto:sszabo@broadstreetheor.com)  
45  
46  
47  
48

49 **Word count: 3,844**

50 **Abstract word count: 300/300**  
51  
52  
53

54 **Number of pages (11), references (47), figures (2) and tables (3)**  
55  
56  
57  
58

**What is already known:**

Risk factors for falls and fractures include urinary incontinence and nocturia, both symptoms of overactive bladder (OAB). Use of anticholinergic medications for treating OAB and other conditions are another independent risk factor, but how cumulative anticholinergic burden modifies risk in OAB is unclear.

**What this study adds:**

This is the first study to demonstrate the association of higher cumulative anticholinergic burden with a higher risk of falls and fractures among those with OAB.

This study contributes evidence to help inform the appropriate use of anticholinergic medications, both among younger and older patients with OAB who have a higher comorbidity burden.

**Key words:** Anticholinergic burden; overactive bladder; falls; fractures; observational study; marginal structural models.

## ABSTRACT

**Objective:** To estimate the association between cumulative anticholinergic burden and falls and fractures in patients with overactive bladder (OAB).

**Design:** A retrospective cohort study using claims data from 2007 to 2015.

**Setting:** A commercially- and Medicare-insured population in the United States.

**Participants:** Cohort members (n=154,432) were  $\geq 18$  years, with OAB identified by ICD-9 codes or OAB-specific medications. The mean age was 56 years, 67.9% were female and median follow-up was 2.5 years.

**Main outcome measures:** Cumulative anticholinergic burden over the preceding 12 months, a unitless value representing the magnitude of anticholinergic exposure over time, was categorized as no (0), low (1 to 89), medium (90 to 499), or high (500+). Unadjusted rates of falls or fractures were estimated, and the increased risk of fall or fracture associated with time-varying anticholinergic burden was assessed using Cox proportional hazards and marginal structural models.

**Results:** The median (IQR) anticholinergic burden value at baseline was 30 (0.0 to 314.0) and was higher among older ( $\geq 65$  years; 183 [3.0 to 713.0]) vs. younger ( $< 65$  years; 13 [0.0 to 200.0]) adults. The unadjusted rate (95% CI) of falls or fractures over the period was 5.0 per 100 patient-years, ranging from 3.1 (3.0 to 3.2) for those with no, to 7.4 (7.1 to 7.6) for those with high burden. The adjusted risk of falls and fractures was greater with higher anticholinergic burden, with a hazard ratio (95% CI) of 1.2 (1.2 to 1.3) for low vs. no, to 1.4 (1.3 to 1.4) for high vs. no burden. Estimates from marginal structural models were lower but risk remained significantly higher with higher anticholinergic burden.

**Conclusion:** Among those with OAB higher levels of anticholinergic burden are associated with a higher rate of falls and fractures. These data highlight the importance of considering anticholinergic burden when treating patients with OAB.

## STRENGTHS AND LIMITATIONS OF THIS STUDY

- This is the first study to demonstrate the association of higher cumulative anticholinergic burden with a higher risk of falls and fractures among those with OAB.
- This study contributes evidence to help inform the appropriate use of anticholinergic medications, both among younger and older patients with OAB who have a higher comorbidity burden.
- The use of a validated generalizable dataset with a large sample size allowed for the calculation of precise estimates of risk and an understanding of the interplay of factors contributing to falls and fractures.
- As with any retrospective study, the findings are limited by the data and duration of follow-up available.
- The findings are also restricted due to the inherent limitations from the use of claims data.

## INTRODUCTION

Falls and fractures, which are major causes of morbidity and mortality among older adults,<sup>1 2</sup> have numerous risk factors, both intrinsic and extrinsic.<sup>2-12</sup> Interactions between one or more of these factors are also important contributors to fall risk.<sup>12-14</sup> Overactive bladder (OAB) is a symptom complex including urinary incontinence and nocturia, two intrinsic risk factors for falls or fractures.<sup>11-13 15 16</sup> While many patients manage their OAB symptoms with lifestyle modifications alone,<sup>17</sup> among those requiring pharmacotherapy most will initially be treated with anticholinergic medications called antimuscarinics.<sup>18</sup> Cumulative or prolonged exposure to anticholinergics, which are widely used to manage patients across a variety of health conditions, is also a risk factor for falls and fractures even among populations already at higher risk.<sup>3-7</sup>

The association between cumulative anticholinergic exposure, termed ‘anticholinergic burden’, and falls and fractures among those with OAB has yet to be examined. To date, studies have infrequently evaluated the impact of OAB treatment<sup>16</sup> and never the impact of anticholinergic burden on falls and fractures among those with OAB.<sup>19</sup> The one published study examining OAB treatments and falls and fractures reported no difference in rates among over 100,000 patients initiating two different antimuscarinics over their first 90 days of treatment; though both the exposure window and follow-up time were short.<sup>20</sup> Understanding the magnitude of the association between anticholinergic burden and falls and fractures among those with OAB is important for several reasons. First, OAB is highly prevalent, particularly among older adults, affecting up to 18.5% of adults over 40 years of age.<sup>21</sup> Second, the high frequency of major risk factors for falls and fractures (including older age, urinary symptoms<sup>11-13</sup> and gait problems)<sup>22</sup> among those with OAB contribute to an approximately 33% increased risk of falls compared to those without OAB,<sup>23</sup> independent of any incremental risk possibly conveyed by anticholinergic burden. However, if antimuscarinics successfully manage the symptoms of OAB that are themselves risk factors for falls, it is conceivable that falls and fractures risk in patients with OAB treated with antimuscarinics could be attenuated. Finally, unlike certain fall risk factors such as older age or sex, anticholinergic burden is potentially modifiable and at-risk patients with OAB could be managed by treatments that do not act by the anticholinergic pathway. Due to the multifactorial nature of falls and fractures risk,<sup>1 14</sup> the application of rigorous statistical techniques is required to appropriately control for potential

1  
2  
3 confounders while estimating the association between time-varying exposures like anticholinergic burden and  
4 relevant outcomes.  
5  
6

7 The objective of this study was to estimate the association between anticholinergic burden and falls and  
8 fractures among individuals with OAB. A secondary objective was to compare rates of falls and fractures  
9 among those with OAB to an age- and sex-matched sample without OAB. These data will be important to help  
10 formulate treatment recommendations for patients with OAB at higher falls and fractures risk.  
11  
12  
13  
14  
15

## 16 17 18 **METHODS**

### 19 **Study design**

20  
21 This retrospective cohort study used the Truven MarketScan claims databases from the United States (US);  
22 large, nationally-representative healthcare datasets of Commercial Claims and Encounters (Commercial) and  
23 patients insured through Medicare Supplemental and Coordination of Benefits (Medicare Supplemental).  
24 These databases contain individual linked data for over 84 million people, allowing characterization of patient  
25 populations, treatment patterns, clinical outcomes and healthcare resource use (including medication fills).<sup>24</sup>  
26 These data have been widely validated for clinical, pharmacoepidemiologic and pharmaco-economic  
27 research.<sup>25-27</sup>  
28  
29  
30  
31  
32  
33  
34  
35  
36  
37

38 The study period was January 2007 to December 2015. For the core analyses, the identification period for  
39 enrollment was from January 2008 to December 2014, to allow  $\geq 1$  year of pre-enrollment data per person for  
40 summarizing baseline characteristics, determining whether an individual is an incident or prevalent case of  
41 OAB (see below) and establishing anticholinergic exposure. The final year of the study period was used to  
42 allow all cohort members the opportunity for  $\geq 1$  year of follow-up post-index date; defined according to the  
43 date of the first identified OAB-related code during the study period. Outcomes could occur at any time  
44 between index date and censoring (e.g. at loss to follow-up, death [if known] or the end of the study period).  
45  
46  
47  
48  
49  
50  
51  
52  
53  
54  
55  
56  
57  
58  
59  
60



1  
2  
3 For comparing to individuals without OAB, data from January 2008 to December 2009 were used to enroll  
4 patients in to either a non-OAB cohort or an OAB cohort ('OAB cohort 2'; representing a subset of the core  
5 OAB cohort). All patients were assigned an index date of January 1, 2010 to avoid immortal time bias in  
6 classifying subsequent outcomes to exposure groups.<sup>28</sup> Data from January 2010 to December 2015 were used  
7 to observe the outcomes of interest.  
8

9  
10  
11  
12  
13 Changes in OAB status over time in the non-OAB cohort were accounted for when allowed by the statistical  
14 model. This was done by allowing OAB status to act as a time-varying covariate.  
15  
16

### 17 18 **Patient involvement**

19 Patients and the public were not involved in this research.  
20  
21

### 22 23 **Study sample**

24 Study inclusion required that individuals be  $\geq 18$  years of age at index date with medical and pharmaceutical  
25 coverage in the twelve months prior to index date. Exclusion criteria were neurogenic bladder/neurogenic  
26 detrusor overactivity, pregnancy, malignant neoplasm, renal impairment, hepatic insufficiency, trauma or  
27 organ transplantation during the study period (Supplementary Table 1).  
28  
29

30 The OAB cohort included individuals with a) validated ICD-9 codes in any position on  $\geq 1$  inpatient claims, or  
31  $\geq 2$  outpatient medical claims on separate dates, or b)  $\geq 2$  OAB-specific medication claims (by National Drug  
32 Codes [NDCs]), during the identification period (Supplementary Table 1). The date of the first relevant code  
33 during the identification period was the individual's index date. Cohort members were classified as incident if,  
34 in the year prior to index, they had no OAB-specific claims. All other OAB cases were classified as prevalent.  
35  
36

37 For comparison to the non-OAB cohort, individuals in OAB cohort 2 were required to have one year of data  
38 availability pre-index and potential for data availability through at least 2010. The non-OAB cohort was  
39 randomly selected according to a 2:1 age and sex match to OAB cohort 2. Members of both cohorts were  
40 assigned an index date of January 1<sup>st</sup> 2010 (i.e. the end of the identification period).  
41  
42  
43  
44  
45  
46  
47  
48  
49  
50  
51  
52  
53  
54  
55  
56  
57  
58  
59  
60

1  
2  
3 In terms of sample size, another recent MarketScan study identified over 1 million individuals with OAB over  
4 five years.<sup>29</sup> Fractures, which occur more infrequently than falls, were observed among 5% of a separate OAB  
5 cohort over five years;<sup>15</sup> which would correspond to 50,000 individuals from a cohort of 1 million. While little  
6 is known about anticholinergic burden and falls in OAB, in an Irish study in Parkinson's disease, 24% of those  
7 with high anticholinergic burden had injurious falls vs. 7% of those without anticholinergic burden.<sup>30</sup> To detect  
8 a difference as great in OAB, at  $\alpha=0.05$  and  $\text{power}=0.8$ , 300 individuals per anticholinergic burden level  
9 would be required. Ultimately, of the eligible cohort of over 2 million persons with OAB, a 15% sample was  
10 randomly selected for computational feasibility.  
11  
12  
13  
14  
15  
16  
17  
18

## 19 20 **Classifying exposure and outcomes**

21  
22  
23 The exposure of interest was cumulative anticholinergic burden estimated by a longitudinal extrapolation<sup>31</sup> of  
24 Anticholinergic Cognitive Burden (ACB) scale scores; a scale that counts usage of 104 medications rated as  
25 contributing at least some anticholinergic burden.<sup>32</sup> The resulting cumulative anticholinergic burden score is a  
26 unitless value calculated considering the: 1) intensity of anticholinergic exposure (by a medication's defined  
27 daily dose),<sup>33 34</sup> 2) strength of anticholinergic activity (by drug-specific ACB score) and 3) period of exposure  
28 (set over the 12 months prior); reflecting an individual's cumulative standardized daily dose of all medications  
29 over time (Supplementary figure 1).<sup>35</sup> Cumulative anticholinergic burden was calculated at baseline and  
30 updated at six-month intervals. At each time point, an individual's anticholinergic burden was classified as no  
31 vs. any anticholinergic burden; with burden characterized as low (1 to 89), medium (90 to 499) and high  
32 (500+), based on an initial review of histograms of score data. An example patient with low anticholinergic  
33 burden may have received two 90-day fills for 25 mg atenolol (ACB score=1) over a year (cumulative  
34 anticholinergic burden = 60.0); versus a patient with high anticholinergic burden having received one 30-day  
35 fill for 100 mg carbamazepine (ACB score = 1), two 30-day fills for solifenacin 10 mg (ACB score = 3) and  
36 two-90 day fills for tolterodine 4 mg (ACB score = 3) over a year (cumulative anticholinergic burden = 912.0;  
37 additional example calculations provided in Supplementary figure 1).  
38  
39  
40  
41  
42  
43  
44  
45  
46  
47  
48  
49  
50  
51  
52  
53  
54  
55  
56  
57  
58  
59  
60

1  
2  
3 The primary outcome was a composite of falls and fractures sufficiently severe to require inpatient or  
4 outpatient care, identified by validated ICD-9 and Healthcare Common Procedure Coding System  
5 (HCPCS)/Current Procedural Terminology (CPT) codes (Supplementary Table 1). While these outcomes were  
6 initially considered individually (i.e. as falls, vs. fractures), due to consistency in the trends in results between  
7 the composite and individual outcomes (*data not shown*), the manuscript results focus on the composite  
8 outcome.  
9  
10  
11  
12  
13  
14  
15

## 16 **Statistical analysis**

17  
18  
19 Baseline characteristics were summarized by means, standard deviations (SD), medians and interquartile  
20 ranges (IQR) for continuous variables; and by n (%) for categorical variables. These included demographics,  
21 risk factors for falls and fractures or high anticholinergic burden and comorbidities (by Elixhauser score<sup>36</sup> and  
22 according to key comorbidity groups; see Supplementary table 1 for codes). Baseline characteristics were  
23 summarized overall and according to age (<65 vs. ≥65 years) and sex.  
24  
25  
26  
27  
28

29 Cumulative anticholinergic burden over the period was summarized by the n (%) with no burden vs. any  
30 burden; the five most frequent anticholinergic medications from the ACB scale prescribed at least once, at the  
31 level of the medication and class; and mean (95% confidence interval [CI]) scores at 6-month intervals since  
32 index; overall and by age.  
33  
34  
35  
36  
37

38 The frequency of falls and fractures over the period was estimated according to level of anticholinergic burden  
39 (at baseline, and time of the event). The unadjusted rate (95%CI) per 100 person-years was estimated using  
40 negative binomial regression models; overall and by age, sex and timing (i.e., an incident vs. prevalent case) of  
41 OAB. Rates were compared according to baseline anticholinergic burden using rate ratios (RR) with 95%CIs.  
42  
43  
44  
45  
46

47 Time to first fall or fracture, according to incremental 6-month time-varying levels of cumulative  
48 anticholinergic burden and adjusted for age, sex and comorbidity status, was estimated using the Andersen-Gill  
49 formulation of the Cox proportional hazards model;<sup>37</sup> and compared between cohorts at different levels of  
50 burden using hazard ratios (HRs) with 95%CIs. Potential covariates for adjustment were identified based on  
51  
52  
53  
54  
55  
56  
57  
58  
59  
60

preliminary models and covariates remaining significant were retained in the final model. To understand the impact of age, a subgroup analysis was performed among patients  $\geq 65$  years at index.

Marginal structural models with sequential propensity score calculation and adjustment implemented within a Cox model<sup>38</sup> are appropriate in cases with time-varying covariates that may be related to treatment initiation or discontinuation (such as changes in comorbidities over the period). A model estimating inverse-probability weights was developed to predict anticholinergic burden based on age, sex and time-varying comorbidity categories as well as all two-way interactions between them. Then, the Cox model incorporating the inverse-probability weights and levels of anticholinergic burden was implemented to estimate the HR (95%CI) of falls and fractures associated with levels of anticholinergic burden among those with OAB.

To compare falls and fractures among those with OAB to the non-OAB cohort, the increased risk according to level of anticholinergic burden and OAB status was first estimated as unadjusted rates and RRs (95%CI) and then using adjusted Cox and marginal structural models, as above. To estimate the extent of the modification (by anticholinergic burden) of the association between OAB and falls and fractures, the products of the coefficients for the main effects of anticholinergic burden and coefficients for interactions between anticholinergic burden and OAB status, were calculated.

## RESULTS

### Core analyses

The mean age of the OAB cohort (n=154,432) was 56 years, 75.9% were <65 years, 67.9% were female (Table 1) and the median duration of follow up post-index was 2.5 years. The mean (SD) Elixhauser comorbidity score was 1.0 (3.9) and 3.6% had a fall or fracture in the preceding year. At baseline, 35.4% had no, 25.0% had low, 20.5% had moderate and 19.1% had high anticholinergic burden. Those with any baseline anticholinergic burden were slightly older on average and more likely to be female. Median (IQR) baseline anticholinergic burden was 30 (0.0 to 314.0); and was substantially higher among those  $\geq 65$  (183 [3.0 to 713.0]), vs. those <65 (13 [0.0 to 200.0]) years.

## Cumulative anticholinergic burden over time

Despite 35% having no anticholinergic burden at baseline, over 80% of those with OAB (n=124,820) had at least some anticholinergic burden over the period. The five most frequent anticholinergic medications prescribed from the ACB scale, two of which were antimuscarinics for OAB, were: codeine (n=27,639, 17.9%; ACB score=1), oxybutynin (n=27,554, 17.8%; ACB score=3), prednisone (n=27,131, 17.6%; ACB score=1), tolterodine (n=26,663; 17.3%; ACB score=3) and cyclobenzaprine (n=21,691; 14.0%; ACB score=2). The most frequent anticholinergic medication classes prescribed were: genitourinary smooth muscle relaxants (n=44,497; 28.8%; which included other antimuscarinics in addition to oxybutynin and tolterodine), antidepressants (n=22,638; 14.7%), beta-blockers (n=21,026; 13.6%), benzodiazepines (n=15,361; 9.9%) and adrenal medications (n=11,728; 7.6%). Mean (95%CI) levels of anticholinergic burden increased over the period and were higher among older vs. younger cohort members (Figure 1).

## Rates of falls and fractures

Among those with OAB, 15,288 (9.9%) experienced a fall (3.3%) or fracture (7.7%) over follow-up; including 3,650 (2.4%) with no burden, 3,495 (2.3%) with low burden, 3,802 (2.5%) with moderate burden and 4,341 (2.8%) with high burden at baseline. The unadjusted rate (95%CI) of falls or fractures was 5.0 (4.9 to 5.1) per 100 patient-years and ranged from 3.1 (3.0 to 3.2) for no burden to 7.4 (7.1 to 7.6) for high burden (Figure 2). For those  $\geq 65$  years, rates were high overall and higher among those with higher baseline anticholinergic burden; from 8.2 (7.6 to 8.8) per 100 person-years for no burden to 11.1 (10.6 to 11.6) for high burden. For those  $<65$  years, rates were lower but also increased with increasing levels of burden; from 2.3 (2.2 to 2.4) per 100 person-years for no burden to 4.8 (4.6 to 5.1) for high burden. When comparing rates between those  $<65$  vs.  $\geq 65$  years at the same level of anticholinergic burden, RRs demonstrate a 2- to 3.5-fold increased risk of falls and fractures among older adults with OAB compared to younger adults with OAB.

A 1.9-fold (95%CI: 1.9 to 2.0) increased risk of falls and fractures was observed among those with some vs. no anticholinergic burden; RRs ranged from 1.5 (1.4 to 1.6) for those with low vs. no anticholinergic burden to 2.4 (2.3 to 2.5) for those with high vs. no anticholinergic burden (Figure 2). The increased risk of falls and

fractures associated with anticholinergic burden level was more pronounced among younger (<65 years; RR 1.7 [1.6 to 1.8]) vs. older ( $\geq$ 65 years; RR 1.4 [1.3 to 1.5]) adults with OAB.

## Adjusted rates of falls and fractures

A statistically significant association was observed between anticholinergic burden and falls and fractures in the Cox model adjusted for age, sex and key comorbidities, and the magnitude of the association increased with increasing levels of anticholinergic burden. HRs (95%CI) for falls and fractures were 1.2 (1.2 to 1.3) for low vs. no anticholinergic burden; 1.3 (1.2 to 1.4) for medium vs. no burden; and 1.4 (1.3 to 1.4) for high vs. no burden. Findings from the marginal structural model were consistent although the magnitude of the association was slightly less: HRs (95%CI) were 1.1 (1.0 to 1.2) for low vs. no burden, 1.2 (1.1 to 1.2) for medium vs. no burden and 1.3 (1.2 to 1.4) for high vs. no burden. Among those  $\geq$ 65 years, anticholinergic burden was significantly associated with falls and fractures in the Cox model, but the association was less than for the overall OAB cohort: 1.1 (1.0 to 1.2) for low vs no burden; 1.2 (1.1 to 1.3) for medium vs. no burden; and 1.2 (1.1 to 1.3) for high vs. no burden (Table 2).

## Comparison to the non-OAB cohort

To understand the impact of OAB on the association between anticholinergic burden and falls and fractures, outcomes from 86,166 individuals without OAB and 43,803 individuals with OAB were analyzed. Both cohorts were 71.0% female and had a mean age of 57.3 years. Mean (SD) Elixhauser comorbidity score was slightly lower among the non-OAB cohort (0.7 [2.9]) vs. OAB cohort 2 (1.0 [3.6]), as was the percentage with a fall or fracture in the previous year (2.4% for the non-OAB cohort vs. 3.3% for OAB cohort 2). Mean (SD) baseline anticholinergic burden for OAB cohort 2 was substantially higher (346.8 [553.2]) than for the non-OAB cohort (88.4 [244.2]), which was reflected in the difference in distribution according to anticholinergic burden level at baseline. Among OAB cohort 2, 33.9% had no burden and 25.5% had high burden at baseline, compared to 59.5% with no burden and 4.6% with high burden at baseline among the non-OAB cohort.

1  
2  
3 The unadjusted rate (95%CI) of falls and fractures per 100 person-years was higher among those with OAB  
4 (4.8 [4.6 to 4.9]) vs. those without (3.3 [3.2 to 3.4]). Rates among OAB cohort 2 ranged from 3.1 (2.9 to 3.3)  
5 for those with no burden to 6.8 (6.5 to 7.1) for high burden; and among the non-OAB cohort, from 2.5 (2.4 to  
6 2.6) for those with no burden to 7.2 (6.6 to 7.8) among the small sample with high burden. Overall, those with  
7 OAB were at a 1.4-fold (1.4 to 1.5) increased risk of falls and fractures compared to those without OAB. RRs  
8 ranged from 1.2 (1.2 to 1.3) for those with no burden, to 0.9 (0.9 to 1.0) among those at the highest level of  
9 burden (Table 3).  
10  
11

12  
13  
14  
15  
16  
17 Adjusted estimates from the Cox model confirmed the statistically significant association between OAB status  
18 and falls and fractures, which is modified by level of anticholinergic burden (Supplementary table 2). Among  
19 those with OAB, the HR for low vs. no anticholinergic burden was 1.2, for medium vs. no anticholinergic  
20 burden was 1.3 and for high vs. no anticholinergic burden was 1.4. Among those without OAB, the HR for low  
21 vs. no anticholinergic burden was 1.4, for medium vs. no burden it was 1.4 and for high vs. no burden it was  
22 1.7. Results from the marginal structural model were similar (*data not shown*).  
23  
24  
25  
26  
27  
28  
29  
30  
31

## 32 **DISCUSSION**

33  
34 While anticholinergic exposure has been associated with higher rates of falls and fractures among those with  
35 other health conditions,<sup>3-7</sup> until now the impact of cumulative anticholinergic burden on the risk of falls and  
36 fractures among those with OAB has been unknown. This large cohort study demonstrated that among those  
37 with OAB, higher cumulative anticholinergic burden is associated with a significantly higher rate of falls and  
38 fractures. After adjustment for age, sex and key comorbidities, the increased risk of falls and fractures was  
39 23% among those at low burden, 30% among those at medium burden and 38% among those at high burden,  
40 compared to those without anticholinergic burden. Rates of falls and fractures were approximately 40% higher  
41 among those with OAB than in an unaffected comparison group. These data suggest that both urinary  
42 symptoms and anticholinergic burden are important risk factors for falls and fractures. The magnitude of the  
43 dose-response-like association and temporal relationship and the biologic plausibility of the association,<sup>39</sup> lend  
44 credence to possible causality<sup>28</sup> between increasing anticholinergic burden and falls and fractures in OAB.  
45  
46  
47  
48  
49  
50  
51  
52  
53  
54  
55  
56  
57  
58  
59  
60



1  
2  
3 The use of a validated generalizable dataset with a large sample size allowed for the calculation of precise  
4 estimates of risk and an understanding of the interplay of factors contributing to falls and fractures. While  
5 assessing cumulative exposure revealed a dose-response-like relationship with falls and fractures, validating  
6 that measure against cross-sectional assessments will be important. Varied statistical techniques were specified  
7 *a priori*, and results were consistent regardless of the approach selected. As expected, estimates from the  
8 marginal structural models were of slightly lower magnitude, as these better control for time-varying  
9 covariates that may impact falls and fractures risk.<sup>40</sup> Finally, when comparing to the non-OAB cohort, falls and  
10 fractures were assigned according to an individual's OAB status prior to the follow-up period to avoid the  
11 potential for misclassification among those who developed OAB during that period.<sup>41</sup>

12  
13  
14  
15  
16  
17  
18  
19  
20  
21  
22 As with any retrospective study, the findings are limited by the data and duration of follow-up available. As  
23 the study used claims data, misclassification may have occurred if coding is driven by reimbursement-related  
24 factors. Given the sampling frame, findings may not be reflective of outcomes for individuals without or with  
25 other types of insurance. As those with intermittent coverage may have been included, both exposure and  
26 outcomes may be underestimated. Additionally, anticholinergic use may be underestimated as over-the-counter  
27 medications, or those not included in the ACB scale, would not have been captured. Finally, it is conceivable  
28 that those with higher anticholinergic burden would have more encounters with the medical system within  
29 which to detect falls or fractures. We did not adjust for this, however, as the health conditions underlying the  
30 increased healthcare resource use would also be on the causal pathway between anticholinergic exposure and  
31 falls and fractures.

32  
33  
34  
35  
36  
37  
38  
39  
40  
41  
42 Few other robust data on the impact of cumulative anticholinergic exposure on falls and fractures among those  
43 with OAB exist. A recent US claims-based study found that antimuscarinic-treated OAB patients were at an  
44 almost 50% increased risk of falls and fractures compared to those without OAB, even without measuring  
45 overall anticholinergic burden.<sup>42</sup> A borderline significant association was reported between antimuscarinic use  
46 and fractures among Taiwanese patients with OAB, although assessment of anticholinergic burden was based  
47 on a single dispensation only.<sup>43</sup> That increased anticholinergic burden was associated with increased falls and  
48 fractures among those with OAB is consistent with findings from those with Parkinson's disease,<sup>5</sup> depression<sup>44</sup>



1  
2  
3 and among post-menopausal women.<sup>4</sup> Exact estimates of increased risk are difficult to compare directly  
4  
5 because most studies measured burden cross-sectionally not cumulatively. Nonetheless, the available evidence  
6  
7 suggests a consistent message of increased falls and fractures risk with increased anticholinergic exposure and  
8  
9 that the amount of increased risk depends on the extent of anticholinergic burden as well as the underlying  
10  
11 disease.

12  
13 Older adults had a 3.3-fold increased risk of falls and fractures compared to younger adults with OAB and a 2-  
14  
15 to 3.5-fold increased risk at each level of anticholinergic burden. While we were surprised that the increased  
16  
17 risk of falls and fractures associated with anticholinergic burden was less marked among older adults with  
18  
19 OAB – a finding consistent in both the unadjusted and adjusted analyses – there are a few plausible  
20  
21 explanations. One is that the baseline risk of falls or fractures is much higher among older adults. This suggests  
22  
23 that older adults with OAB likely have many predisposing factors other than anticholinergic burden compared  
24  
25 to younger OAB patients for whom anticholinergic burden may be the main contributing risk factor.  
26  
27 Regardless of the mechanism, these findings highlight the importance of medication review for falls risk  
28  
29 among younger and older patients with OAB.<sup>45 46</sup>

30  
31  
32 In an administrative database study of patients with OAB, higher levels of anticholinergic burden are  
33  
34 associated with a higher rate of falls and fractures; with those at the highest level at an almost 40% increased  
35  
36 risk of falls and fractures compared to those without anticholinergic burden. These data will help inform the  
37  
38 appropriate use of anticholinergic medications among both younger and older OAB patients with multifaceted  
39  
40 comorbidity requiring anticholinergic exposure.<sup>47</sup>

1 **Tables and figures**

2  
3 **Table 1 Demographic and clinical characteristics of the OAB cohort at baseline; Truven MarketScan databases 2007-2015**

|                                                        | Overall     |        | By age      |        |            |        | By anticholinergic burden |        |             |        | By sex     |        |             |        |
|--------------------------------------------------------|-------------|--------|-------------|--------|------------|--------|---------------------------|--------|-------------|--------|------------|--------|-------------|--------|
|                                                        |             |        | <65         |        | ≥65        |        | No burden                 |        | Some burden |        | Male       |        | Female      |        |
|                                                        | N = 154,432 |        | N = 117,271 |        | N = 37,161 |        | N = 54,602                |        | N = 99,830  |        | N = 49,597 |        | N = 104,835 |        |
|                                                        | n           | %      | n           | %      | n          | %      | n                         | %      | n           | %      | n          | %      | n           | %      |
| <b>Age (years)</b>                                     |             |        |             |        |            |        |                           |        |             |        |            |        |             |        |
| 1 Mean (SD)                                            | 55.7        | 15.2   | 49.4        | 11.0   | 75.7       | 7.5    | 51.4                      | 14.6   | 58.1        | 15.0   | 56.2       | 14.0   | 55.5        | 15.8   |
| 2 Median (IQR)                                         | 56          | 46, 64 | 52          | 43, 58 | 75         | 69, 81 | 52                        | 42, 60 | 58          | 49, 68 | 57         | 48, 64 | 55          | 46, 64 |
| 3 ≤45                                                  | 36,039      | 23.3   | 36,039      | 30.7   | 0          | 0      | 17,300                    | 31.7   | 18,739      | 18.8   | 9,915      | 20     | 26,124      | 24.9   |
| 4 46-55                                                | 39,784      | 25.8   | 39,784      | 33.9   | 0          | 0      | 15,357                    | 28.1   | 24,427      | 24.5   | 12,743     | 25.7   | 27,041      | 25.8   |
| 5 56-65                                                | 43,414      | 28.1   | 41,448      | 35.3   | 1,966      | 5.3    | 14,610                    | 26.8   | 28,804      | 28.9   | 16,160     | 32.6   | 27,254      | 26     |
| 6 66-75                                                | 17,649      | 11.4   | 0           | 0      | 17,649     | 47.5   | 4,383                     | 8      | 13,266      | 13.3   | 6,115      | 12.3   | 11,534      | 11     |
| 7 76-85                                                | 13,099      | 8.5    | 0           | 0      | 13,099     | 35.2   | 2,341                     | 4.3    | 10,758      | 10.8   | 3,765      | 7.6    | 9,334       | 8.9    |
| 8 86+                                                  | 4,447       | 2.9    | 0           | 0      | 4,447      | 12     | 611                       | 1.1    | 3,836       | 3.8    | 899        | 1.8    | 3,548       | 3.4    |
| 9 <b>Female sex</b>                                    | 104,835     | 67.9   | 79,159      | 67.5   | 25,676     | 69.1   | 29,999                    | 54.9   | 74,836      | 75.0   | 0          | 0      | 104,835     | 100.0  |
| 10 <b>Comorbidities*</b>                               |             |        |             |        |            |        |                           |        |             |        |            |        |             |        |
| 11 Hypertension, uncomplicated                         | 55,900      | 36.2   | 35,332      | 30.1   | 20,568     | 55.3   | 14,401                    | 26.4   | 41,499      | 41.6   | 19,895     | 40.1   | 36,005      | 34.3   |
| 12 Diabetes mellitus & diabetic peripheral neuropathy  | 21,490      | 13.9   | 13,424      | 11.4   | 8,066      | 21.7   | 5,540                     | 10.1   | 15,950      | 16.0   | 8,205      | 16.5   | 13,285      | 12.7   |
| 13 Cerebrovascular disease and stroke                  | 8,517       | 5.5    | 3,180       | 2.7    | 5,337      | 14.4   | 1,599                     | 2.9    | 6,918       | 6.9    | 2,905      | 5.9    | 5,612       | 5.4    |
| 14 Dizziness                                           | 8,398       | 5.4    | 5,366       | 4.6    | 3,032      | 8.2    | 1,905                     | 3.5    | 6,493       | 6.5    | 2,249      | 4.5    | 6,149       | 5.9    |
| 15 Osteoporosis                                        | 6,609       | 4.3    | 3,162       | 2.7    | 3,447      | 9.3    | 1,626                     | 3.0    | 4,983       | 5.0    | 471        | 0.9    | 6,138       | 5.9    |
| 16 Arthritis                                           | 6,345       | 4.1    | 4,370       | 3.7    | 1,975      | 5.3    | 1,295                     | 2.4    | 5,050       | 5.1    | 1,097      | 2.2    | 5,248       | 5.0    |
| 17 <b>Falls or fractures within the preceding year</b> | 5,542       | 3.6    | 3,059       | 2.6    | 2,483      | 6.7    | 1,163                     | 2.1    | 4,379       | 4.4    | 1,210      | 2.4    | 4,332       | 4.1    |
| 18 <b>Lifestyle factors</b>                            |             |        |             |        |            |        |                           |        |             |        |            |        |             |        |
| 19 Smoking                                             | 13,548      | 8.8    | 8,836       | 7.5    | 4,712      | 12.7   | 2,956                     | 5.4    | 10,592      | 10.6   | 4,426      | 8.9    | 9,122       | 8.7    |
| 20 Alcohol abuse                                       | 768         | 0.5    | 658         | 0.6    | 110        | 0.3    | 188                       | 0.3    | 580         | 0.6    | 374        | 0.8    | 394         | 0.4    |
| 21 <b>Medications</b>                                  |             |        |             |        |            |        |                           |        |             |        |            |        |             |        |
| 22 Opioids                                             | 56,036      | 36.3   | 41,608      | 35.5   | 14,428     | 38.8   | 11,044                    | 20.2   | 44,992      | 45.1   | 14,887     | 30.0   | 41,149      | 39.3   |
| 23 Benzodiazepine use                                  | 27,507      | 17.8   | 20,252      | 17.3   | 7,255      | 19.5   | 2,349                     | 4.3    | 25,158      | 25.2   | 5,882      | 11.9   | 21,625      | 20.6   |
| 24 Chronic use of inhaled or oral corticosteroids      | 5,367       | 3.5    | 3,306       | 2.8    | 2,061      | 5.5    | 888                       | 1.6    | 4,479       | 4.5    | 1,492      | 3.0    | 3,875       | 3.7    |
| 25 <b>Risk factors for high anticholinergic burden</b> |             |        |             |        |            |        |                           |        |             |        |            |        |             |        |
| 26 Depression, neurotic disorders, or psychosis        | 32,674      | 21.2   | 27,037      | 23.1   | 5,637      | 15.2   | 7,838                     | 14.4   | 24,836      | 24.9   | 8,135      | 16.4   | 24,539      | 23.4   |
| 27 COPD                                                | 10,016      | 6.5    | 5,604       | 4.8    | 4,412      | 11.9   | 1,824                     | 3.3    | 8,192       | 8.2    | 3,167      | 6.4    | 6,849       | 6.5    |

|                                                  | Overall     |            | By age      |            |            |            | By anticholinergic burden |          |             |             | By sex     |            |             |            |
|--------------------------------------------------|-------------|------------|-------------|------------|------------|------------|---------------------------|----------|-------------|-------------|------------|------------|-------------|------------|
|                                                  |             |            | <65         |            | ≥65        |            | No burden                 |          | Some burden |             | Male       |            | Female      |            |
|                                                  | N = 154,432 |            | N = 117,271 |            | N = 37,161 |            | N = 54,602                |          | N = 99,830  |             | N = 49,597 |            | N = 104,835 |            |
|                                                  | n           | %          | n           | %          | n          | %          | n                         | %        | n           | %           | n          | %          | n           | %          |
| Parkinson's disease/other neurologic impairments | 5,973       | 3.9        | 3,401       | 2.9        | 2,572      | 6.9        | 1,059                     | 1.9      | 4,914       | 4.9         | 1,847      | 3.7        | 4,126       | 3.9        |
| Dementia                                         | 1,570       | 1.0        | 138         | 0.1        | 1,432      | 3.9        | 216                       | 0.4      | 1,354       | 1.4         | 408        | 0.8        | 1,162       | 1.1        |
| Intestinal motility disorders                    | 152         | 0.1        | 107         | 0.1        | 45         | 0.1        | 43                        | 0.1      | 109         | 0.1         | 39         | 0.1        | 113         | 0.1        |
| <b>Glixhauser score, mean (SD)</b>               | 1           | 3.9        | 1           | 3.3        | 3          | 5.0        | 1                         | 3.0      | 1           | 4.3         | 1          | 3.9        | 1           | 3.9        |
| <b>Timing of OAB</b>                             |             |            |             |            |            |            |                           |          |             |             |            |            |             |            |
| Incident case                                    | 106,730     | 69.1       | 84,888      | 72.4       | 21,842     | 58.8       | 43,688                    | 80.0     | 63,042      | 63.1        | 36,783     | 74.2       | 69,947      | 66.7       |
| Prevalent case                                   | 47,702      | 30.9       | 32,383      | 27.6       | 15,319     | 41.2       | 10,914                    | 20.0     | 36,788      | 36.9        | 12,814     | 25.8       | 34,888      | 33.3       |
| <b>Anticholinergic burden</b>                    |             |            |             |            |            |            |                           |          |             |             |            |            |             |            |
| Mean (SD)                                        | 266.7       | 486.5      | 213.8       | 443.9      | 433.8      | 570.3      | 0                         | 0        | 412.6       | 553.2       | 154.2      | 365.3      | 320.0       | 526.1      |
| Median (IQR)                                     | 30          | 0.0, 314.0 | 13          | 0.0, 200.0 | 183        | 3.0, 713.0 | 0                         | 0.0, 0.0 | 180         | 36.0, 609.0 | 1          | 0.0, 120.0 | 60.0        | 0.0, 445.5 |
| None                                             | 54,602      | 35.4       | 46,746      | 39.9       | 7,856      | 21.1       | 54,602                    | 100.0    | 0           | 0           | 24,603     | 49.6       | 29,999      | 28.6       |
| Low                                              | 38,669      | 25.0       | 31,229      | 26.6       | 7,440      | 20.0       | 0                         | 0        | 38,669      | 38.7        | 11,504     | 23.2       | 27,165      | 25.9       |
| Medium                                           | 31,719      | 20.5       | 22,006      | 18.8       | 9,713      | 26.1       | 0                         | 0        | 31,719      | 31.8        | 8,460      | 17.1       | 23,259      | 22.2       |
| High                                             | 29,442      | 19.1       | 17,290      | 14.7       | 12,152     | 32.7       | 0                         | 0        | 29,442      | 29.5        | 5,030      | 10.1       | 24,412      | 23.3       |

COPD: chronic obstructive pulmonary disease; OAB: overactive bladder

\*Only comorbidities identified among >2.5% are presented. The following were identified among <2.5% of the cohort; syncope, complicated hypertension, cognitive impairment, Alzheimer's disease, musculoskeletal problems, hyperparathyroidism, decreased vision, chronic kidney disease, leg and foot amputation, hypotension, palmonental reflex.

**Table 2 Adjusted (left) Cox model- and (right) marginal structural model-estimated hazard ratios (95% CI) for the association between falls and fractures and anticholinergic burden among the OAB cohort, including the subgroup aged  $\geq 65$  years (middle); Truven MarketScan databases 2007-2015**

|                                                                    | Cox model          |         |                                 |         | Marginal structural model |         |
|--------------------------------------------------------------------|--------------------|---------|---------------------------------|---------|---------------------------|---------|
|                                                                    | Overall population |         | Subgroup aged $\geq 65$ years** |         | Overall population        |         |
|                                                                    | HR (95%CI)         | p-value | HR (95%CI)                      | p-value | HR (95%CI)                | p-value |
| <b>By anticholinergic burden level vs. no burden</b>               |                    |         |                                 |         |                           |         |
| Low                                                                | 1.2 (1.2, 1.3)     | <0.001  | 1.1 (1.0, 1.2)                  | 0.006   | 1.1 (1.0, 1.2)            | 0.017   |
| Medium                                                             | 1.3 (1.2, 1.4)     | <0.001  | 1.2 (1.1, 1.3)                  | <0.001  | 1.2 (1.1, 1.2)            | <0.001  |
| High                                                               | 1.4 (1.3, 1.4)     | <0.001  | 1.2 (1.1, 1.3)                  | <0.001  | 1.3 (1.2, 1.4)            | <0.001  |
| <b>By age category vs. <math>\leq 45</math></b>                    |                    |         |                                 |         |                           |         |
| 46 to 55                                                           | 1.3 (1.2, 1.3)     | <0.001  | 1.7 (1.6, 1.7)*                 | <0.001  |                           |         |
| 56 to 65                                                           | 1.5 (1.4, 1.6)     | <0.001  |                                 |         |                           |         |
| 66 to 75                                                           | 2.3 (2.2, 2.4)     | <0.001  |                                 |         |                           |         |
| 76 to 85                                                           | 3.4 (3.2, 3.6)     | <0.001  |                                 |         |                           |         |
| 86+                                                                | 5.0 (4.6, 5.4)     | <0.001  |                                 |         |                           |         |
| <b>Sex</b>                                                         |                    |         |                                 |         |                           |         |
| Female vs. male                                                    | 1.5 (1.5, 1.6)     | <0.001  | 1.6 (1.5, 1.7)                  | <0.001  |                           |         |
| <b>Comorbidity categories at baseline</b>                          |                    |         |                                 |         |                           |         |
| Cardiovascular diseases**                                          | 1.1 (1.1, 1.1)     | 0.018   | 1.2 (1.1, 1.2)                  | <0.001  |                           |         |
| Neurologic impairments                                             | 1.5 (1.4, 1.6)     | <0.001  | 1.7 (1.5, 1.8)                  | <0.001  |                           |         |
| Endocrine, nutritional and metabolic disease                       | 1.1 (1.1, 1.2)     | <0.001  | 1.3 (1.1, 1.4)                  | <0.001  |                           |         |
| Cardiovascular disease X Neurologic impairments                    | 1.1 (1.0, 1.2)     | 0.043   | 1.0 (0.9, 1.1)                  | 0.933   |                           |         |
| Cardiovascular disease X Endocrine, nutritional, metabolic disease | 1.0 (1.0, 1.1)     | 0.772   | 0.9 (0.8, 1.0)                  | 0.123   |                           |         |
| Neurologic impairments X Endocrine, nutritional, metabolic disease | 1.1 (1.0, 1.2)     | 0.087   | 1.0 (0.9, 1.1)                  | 0.794   |                           |         |

\*For the subgroup analysis among those aged  $\geq 65$  years, age categories for comparison were 65 to <74 years, vs.  $\geq 75$  vs <75 years

\*\* Cardiovascular disease = cerebrovascular disease + stroke

**Table 3** Rates and rate ratios for falls and fractures estimated over the study period among OAB cohort 2 and non-OAB cohort, according to baseline anticholinergic burden; Truven MarketScan databases 2007-2015

|                                                                 | OAB cohort 2<br>N = 43,803 | Non-OAB cohort<br>N = 86,166 | OAB vs. non-OAB<br>N = 129,249 |
|-----------------------------------------------------------------|----------------------------|------------------------------|--------------------------------|
| <b>Fall and Fracture Rates (95%CI)<br/>per 100 person-years</b> |                            |                              |                                |
| Overall, crude rate                                             | 4.8 (4.6, 4.9)             | 3.3 (3.2, 3.4)               | 1.4 (1.4, 1.5)                 |
| By anticholinergic burden level                                 |                            |                              |                                |
| None                                                            | 3.1 (3.0, 3.3)             | 2.5 (2.4, 2.6)               | 1.2 (1.2, 1.3)                 |
| Low                                                             | 4.2 (4.0, 4.5)             | 3.6 (3.4, 3.8)               | 1.2 (1.1, 1.3)                 |
| Medium                                                          | 5.4 (5.1, 5.7)             | 4.8 (4.6, 5.1)               | 1.1 (1.0, 1.2)                 |
| High                                                            | 6.8 (6.5, 7.1)             | 7.2 (6.6, 7.8)               | 0.9 (0.9, 1.0)                 |
| <b>Rate ratios, by anticholinergic<br/>burden level</b>         |                            |                              |                                |
| Any vs. none                                                    | 1.8 (1.7, 1.9)             | 1.8 (1.7, 1.9)               |                                |
| Low vs. none                                                    | 1.4 (1.3, 1.5)             | 1.4 (1.4, 1.5)               |                                |
| Medium vs. none                                                 | 1.7 (1.6, 1.9)             | 1.9 (1.8, 2.1)               |                                |
| High vs. none                                                   | 2.2 (2.1, 2.4)             | 2.9 (2.6, 3.2)               |                                |

CI: confidence interval; OAB: overactive bladder

1  
2  
3 **FIGURE LEGENDS**  
4  
5

6 **Figure 1:** Mean (95%CI) level of anticholinergic burden according to time since cohort  
7 entry, and age  
8

9  
10 **Figure 2** Rates\* (top), and rate ratios\* (bottom), for falls and fractures estimated over the  
11 study period among the OAB cohort, according to baseline anticholinergic  
12 burden, overall and according to age (<65 years vs. ≥65 years); Truven  
13 MarketScan databases 2007-2015  
14  
15

16  
17 **Supplementary Figure 1:** Example trajectory and calculation of cumulative anticholinergic  
18 burden over time  
19  
20  
21  
22  
23  
24  
25  
26  
27  
28  
29  
30  
31  
32  
33  
34  
35  
36  
37  
38  
39  
40  
41  
42  
43  
44  
45  
46  
47  
48  
49  
50  
51  
52  
53  
54  
55  
56  
57  
58  
59  
60

## REQUIRED STATEMENTS

**Contributorship statement:** SM Szabo and K Gooch were responsible for the conception and design of the work. SM Szabo, G Lozano-Ortega, B Rogula and A Deighton were responsible for data collection. S M Szabo, G Lozano-Ortega, B Rogula, K Gooch, C Schermer, D Walker, E Vonesh, N Campbell, and A Deighton were responsible for data analysis and interpretation. SM Szabo was responsible for drafting the article. S M Szabo, K Gooch, C Schermer, D Walker, G Lozano-Ortega, B Rogula, A Deighton, E Vonesh, N Campbell were responsible for critical revision of the article. S M Szabo, K Gooch, C Schermer, D Walker, G Lozano-Ortega, B Rogula, A Deighton, E Vonesh, and N Campbell were responsible for final approval of the version to be published.

**Copyright:** The Corresponding Author has the right to grant on behalf of all authors and does grant on behalf of all authors, a worldwide licence to the Publishers and its licensees in perpetuity, in all forms, formats and media (whether known now or created in the future), to i) publish, reproduce, distribute, display and store the Contribution, ii) translate the Contribution into other languages, create adaptations, reprints, include within collections and create summaries, extracts and/or, abstracts of the Contribution, iii) create any other derivative work(s) based on the Contribution, iv) to exploit all subsidiary rights in the Contribution, v) the inclusion of electronic links from the Contribution to third party material where-ever it may be located; and, vi) licence any third party to do any or all of the above.

**Competing interest statement:** All authors have completed the ICMJE form for Disclosure of Potential Conflicts of Interest (available on request from the corresponding author). Shelagh Szabo, Greta Lozano-Ortega, Alison Deighton and Basia Rogula declare a relevant conflict of interest for the work under consideration for publication as Broadstreet received funding from Astellas for the design and analysis of the data for this study; they declare no conflicts relative to financial activities outside of the submitted work, intellectual property or other relationships not covered. Katherine Gooch, Carol Schermer and David Walker declare a relevant conflict of interest to the work under consideration for publication and for relevant financial activities outside of the submitted work as they are or were employees of Astellas Pharma, the funder of the study, at the time of study completion; they declare no conflicts relative to intellectual property or other relationships not covered. Edward Vonesh declares a relevant conflict of interest for the work under consideration for publication and for relevant financial activities outside of the submitted work as he received personal fees for consultancy for Astellas Pharma, the study funder; he declares no conflicts relative to intellectual property or other relationships not covered. Noll Campbell declares a relevant conflict of interest for relevant financial activities outside of the submitted work as he received personal fees for consultancy for Astellas Pharma, the study funder; he declares no conflicts relative to the work under consideration for publication, intellectual property or other relationships not covered.

**Transparency:** Shelagh M Szabo affirms that this manuscript is an honest, accurate, and transparent account of the study being reported; that no important aspects of the study have been omitted; and that any discrepancies from the study as planned (and, if relevant, registered) have been explained.

1  
2  
3 **Ethics:** Because the Truven MarketScan data are de-identified and are fully HIPAA compliant, and  
4 because this study did not involve the collection, use, or transmittal of individually identifiable data,  
5 Institutional Review Board review or approval was not required.  
6  
7

8 **Disclosures:**  
9

10 Katherine Gooch, Carol Schermer and David Walker = Are/were employees, Astellas Pharma Global  
11 Development, Inc. at the time of study completion  
12

13 Shelagh Szabo, Greta Lozano-Ortega, Basia Rogula, and Alison Deighton = Employees of Broadstreet  
14 HEOR, which received payment from Astellas to conduct the study  
15

16 Edward Vonesh and Noll Campbell = Received payment from Astellas for consultation  
17  
18

19 **Funding and role of study sponsor:** The present study was initiated by Astellas Pharma Global  
20 Development, Inc., and funding for the conduct of this study was provided by Astellas Pharma Global  
21 Development, Inc. Publication of the study results was not contingent on permission from the sponsor.  
22

23 **Data sharing:** The authors confirm that all data required to replicate our findings is available for  
24 purchase by any researcher from Truven MarketScan via this link  
25 <https://marketscan.truvenhealth.com/marketscanportal/>  
26  
27

28 **Acknowledgement:** We would like to thank Elizabeth Badillo for drafting, reviewing and editing this  
29 manuscript. Elizabeth Badillo is an employee of Broadstreet HEOR, which received payment from  
30 Astellas.  
31

32 The corresponding author attests that all listed authors meet authorship criteria and that no others meeting  
33 the criteria have been omitted.  
34  
35  
36  
37  
38  
39  
40  
41  
42  
43  
44  
45  
46  
47  
48  
49  
50  
51  
52  
53  
54  
55  
56  
57  
58  
59  
60



**REFERENCES**

1. Tinetti ME, Speechley M, Ginter SF. Risk factors for falls among elderly persons living in the community. *N Engl J Med* 1988;319(26):1701-7. doi: 10.1056/nejm198812293192604 [published Online First: 1988/12/29]
2. Nevitt MC, Cummings SR, Hudes ES. Risk factors for injurious falls: a prospective study. *J Gerontol* 1991;46(5):M164-70.
3. Zia A, Kamaruzzaman S, Myint PK, et al. Anticholinergic burden is associated with recurrent and injurious falls in older individuals. *Maturitas* 2016;84:32-37.
4. Marcum ZA, Wirtz HS, Pettinger M, et al. Anticholinergic medication use and falls in postmenopausal women: findings from the women's health initiative cohort study. *BMC Geriatr* 2016;16:76. doi: 10.1186/s12877-016-0251-0
5. Crispo JA, Willis AW, Thibault DP, et al. Associations between Anticholinergic Burden and Adverse Health Outcomes in Parkinson Disease. *PloS one* 2016;11(3):e0150621.
6. Aizenberg D, Sigler M, Weizman A, et al. Anticholinergic burden and the risk of falls among elderly psychiatric inpatients: a 4-year case-control study. *International psychogeriatrics* 2002;14(3):307-10. [published Online First: 2002/12/12]
7. Marcum ZA, Perera S, Thorpe JM, et al. Anticholinergic Use and Recurrent Falls in Community-Dwelling Older Adults: Findings From the Health ABC Study. *Ann Pharmacother* 2015;49(11):1214-21. doi: 10.1177/1060028015596998
8. Pariente A, Dartigues JF, Benichou J, et al. Benzodiazepines and injurious falls in community dwelling elders. *Drugs Aging* 2008;25(1):61-70.
9. O'Loughlin JL, Robitaille Y, Boivin JF, et al. Incidence of and risk factors for falls and injurious falls among the community-dwelling elderly. *Am J Epidemiol* 1993;137(3):342-54.
10. Muir SW, Gopaul K, Montero Odasso MM. The role of cognitive impairment in fall risk among older adults: a systematic review and meta-analysis. *Age Ageing* 2012;41(3):299-308. doi: 10.1093/ageing/afs012
11. Takazawa K, Arisawa K. Relationship between the type of urinary incontinence and falls among frail elderly women in Japan. *J Med Invest* 2005;52(3-4):165-71.
12. Nakagawa H, Niu K, Hozawa A, et al. Impact of nocturia on bone fracture and mortality in older individuals: a Japanese longitudinal cohort study. *J Urol* 2010;184(4):1413-8. doi: 10.1016/j.juro.2010.05.093 [published Online First: 2010/08/24]
13. Vaughan CP, Brown CJ, Goode PS, et al. The association of nocturia with incident falls in an elderly community-dwelling cohort. *Int J Clin Pract* 2010;64(5):577-83. doi: 10.1111/j.1742-1241.2009.02326.x
14. Dionyssiotis Y. Analyzing the problem of falls among older people. *International Journal of General Medicine* 2012;5:805-13. doi: 10.2147/IJGM.S32651
15. Wagner TH, Hu TW, Bentkover J, et al. Health-related consequences of overactive bladder. *Am J Manag Care* 2002;8(19 Suppl):S598-607.
16. Jayadevappa R, Chhatre S, Newman DK, et al. Association between overactive bladder treatment and falls among older adults. *Neurourol Urodyn* 2018 doi: 10.1002/nau.23719
17. Dumoulin C, Hay-Smith J. Pelvic floor muscle training versus no treatment for urinary incontinence in women. A Cochrane systematic review. *Eur J Phys Rehabil Med* 2008;44(1):47-63.

18. Gormley EA, Lightner DJ, Faraday M, et al. Diagnosis and treatment of overactive bladder (non-neurogenic) in adults: AUA/SUFU guideline amendment. *The Journal of urology* 2015;193(5):1572-80.
19. The risk of falls and fractures among those with overactive bladder (OAB): A systematic review. ISPOR European Meeting 2016; Vienna, Austria.
20. Gomes T, Juurlink DN, Ho JMW, et al. Risk of serious falls associated with oxybutynin and tolterodine: A population based study. *Journal of Urology* 2011;186(4):1340-44. doi: <http://dx.doi.org/10.1016/j.juro.2011.05.077>
21. Onukwugha E, Zuckerman IH, McNally D, et al. The total economic burden of overactive bladder in the United States: a disease-specific approach. *Am J Manag Care* 2009;15(4 Suppl):S90-7.
22. Hausdorff JM. Gait variability: methods, modeling and meaning. *J Neuroeng Rehabil* 2005;2:19. doi: 10.1186/1743-0003-2-19
23. Darkow T, Fontes CL, Williamson TE. Costs associated with the management of overactive bladder and related comorbidities. *Pharmacotherapy* 2005;25(4):511-9.
24. IBM Watson Health. MarketScan Databases 2018 [Available from: <http://truvenhealth.com/markets/life-sciences/products/data-tools/marketscan-databases>.
25. Wu JM, Matthews CA, Conover MM, et al. Lifetime Risk of Stress Incontinence or Pelvic Organ Prolapse Surgery. *Obstetrics and gynecology* 2014;123(6):1201-06. doi: 10.1097/AOG.0000000000000286
26. Marsico M, Mehta V, Chastek B, et al. Estimating the incidence and prevalence of juvenile-onset recurrent respiratory papillomatosis in publicly and privately insured claims databases in the United States. *Sexually transmitted diseases* 2014;41(5):300-05.
27. Gauthier G, Guérin A, Zhdanova M, et al. Treatment patterns, healthcare resource utilization, and costs following first-line antidepressant treatment in major depressive disorder: a retrospective US claims database analysis. *BMC Psychiatry* 2017;17:222. doi: 10.1186/s12888-017-1385-0
28. Rothman KJ, Greenland S, Lash TL. Modern epidemiology. 3rd ed. Philadelphia: Wolters Kluwer Health/Lippincott Williams & Wilkins 2008.
29. Durden E, Walker D, Gray S, et al. The Direct and Indirect Costs Associated With Overactive Bladder Within a Commercially-Insured Population in the United States. *J Occup Environ Med* 2018 doi: 10.1097/JOM.0000000000001367
30. Richardson K, Bennett K, Maidment ID, et al. Use of Medications with Anticholinergic Activity and Self-Reported Injurious Falls in Older Community-Dwelling Adults. *J Am Geriatr Soc* 2015;63(8):1561-9. doi: 10.1111/jgs.13543
31. Assessment of anticholinergic burden scales and measures for estimating anticholinergic exposure in retrospective US database analyses. ISPOR 22nd Annual International Meeting; 2018; Baltimore, MD.
32. Boustani M, Campbell N, Munger S, et al. Impact of anticholinergics on the aging brain: a review and practical application. 2008
33. WHO Collaborating Centre for Drug Statistics Methodology. ATC/DDD Index 2017 [Available from: [http://www.whooc.no/atc\\_ddd\\_index/](http://www.whooc.no/atc_ddd_index/).
34. WHO Collaborating Centre for Drug Statistics Methodology. Definition and general considerations [Available from: [https://www.whooc.no/ddd/definition\\_and\\_general\\_considera/](https://www.whooc.no/ddd/definition_and_general_considera/).

- 1
- 2
- 3 35. Gray SL, Anderson ML, Dublin S, et al. Cumulative use of strong anticholinergics and incident
- 4 dementia: A prospective cohort study. *JAMA Internal Medicine* 2015;175(3):401-07. doi:
- 5 10.1001/jamainternmed.2014.7663
- 6
- 7 36. Elixhauser A, Steiner C, Harris DR, et al. Comorbidity measures for use with administrative data.
- 8 *Medical care* 1998;36(1):8-27.
- 9
- 10 37. Vonesh E. Generalized Linear and Nonlinear Models for Correlated Data: Theory and Applications
- 11 Using SAS. Cary, NC: SAS Institute Inc. 2012.
- 12
- 13 38. Hernan MA, Brumback B, Robins JM. Marginal structural models to estimate the causal effect of
- 14 zidovudine on the survival of HIV-positive men. *Epidemiology* 2000;11(5):561-70.
- 15
- 16 39. Collamati A, Martone AM, Poscia A, et al. Anticholinergic drugs and negative outcomes in the older
- 17 population: from biological plausibility to clinical evidence. *Aging clinical and experimental*
- 18 *research* 2016;28(1):25-35. doi: 10.1007/s40520-015-0359-7 [published Online First:
- 19 2015/05/02]
- 20
- 21 40. Imai K, Ratkovic M. Robust Estimation of Inverse Probability Weights for Marginal Structural
- 22 Models. *Journal of the American Statistical Association* 2015;110(511):1013-23. doi:
- 23 10.1080/01621459.2014.956872
- 24
- 25 41. Rothman KG. Modern Epidemiology 2012.
- 26
- 27 42. Yehoshua A, Chancellor M, Vasavada S, et al. Health Resource Utilization and Cost for Patients with
- 28 Incontinent Overactive Bladder Treated with Anticholinergics. *J Manag Care Spec Pharm*
- 29 2016;22(4):406-13. doi: 10.18553/jmcp.2016.22.4.406
- 30
- 31 43. Kao LT, Huang CY, Lin HC, et al. No Increased Risk of Fracture in Patients Receiving
- 32 Antimuscarinics for Overactive Bladder Syndrome: A Retrospective Cohort Study. *J Clin*
- 33 *Pharmacol* 2018 doi: 10.1002/jcph.1067
- 34
- 35 44. Chatterjee S, Bali V, Carnahan RM, et al. Anticholinergic medication use and risk of fracture in
- 36 elderly adults with depression. *JAGS* 2016;64:1492-7.
- 37
- 38 45. MacDiarmid SA. Maximizing the Treatment of Overactive Bladder in the Elderly. *Reviews in*
- 39 *Urology* 2008;10(1):6-13.
- 40
- 41 46. Talasz H, Lechleitner M. Polypharmacy and incontinence. *Zeitschrift für Gerontologie und Geriatrie*
- 42 2012;45(6):464-67.
- 43
- 44 47. Maman K, Aballea S, Nazir J, et al. Comparative efficacy and safety of medical treatments for the
- 45 management of overactive bladder: a systematic literature review and mixed treatment
- 46 comparison. *Eur Urol* 2014;65(4):755-65. doi: 10.1016/j.eururo.2013.11.010
- 47
- 48
- 49
- 50
- 51
- 52
- 53
- 54
- 55
- 56
- 57
- 58
- 59
- 60

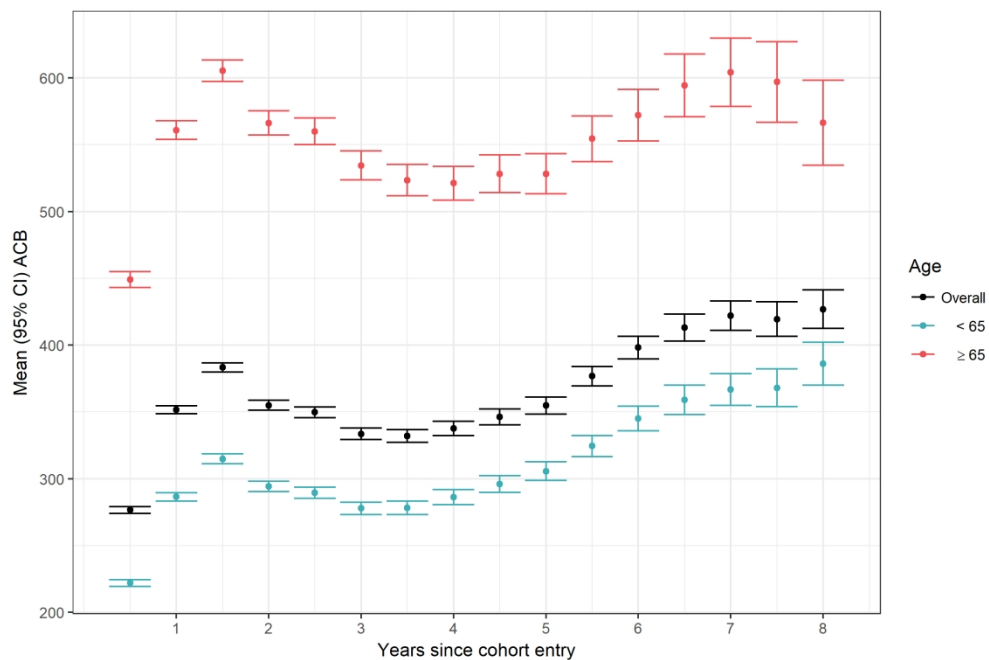

Mean (95%CI) level of anticholinergic burden according to time since cohort entry, and age

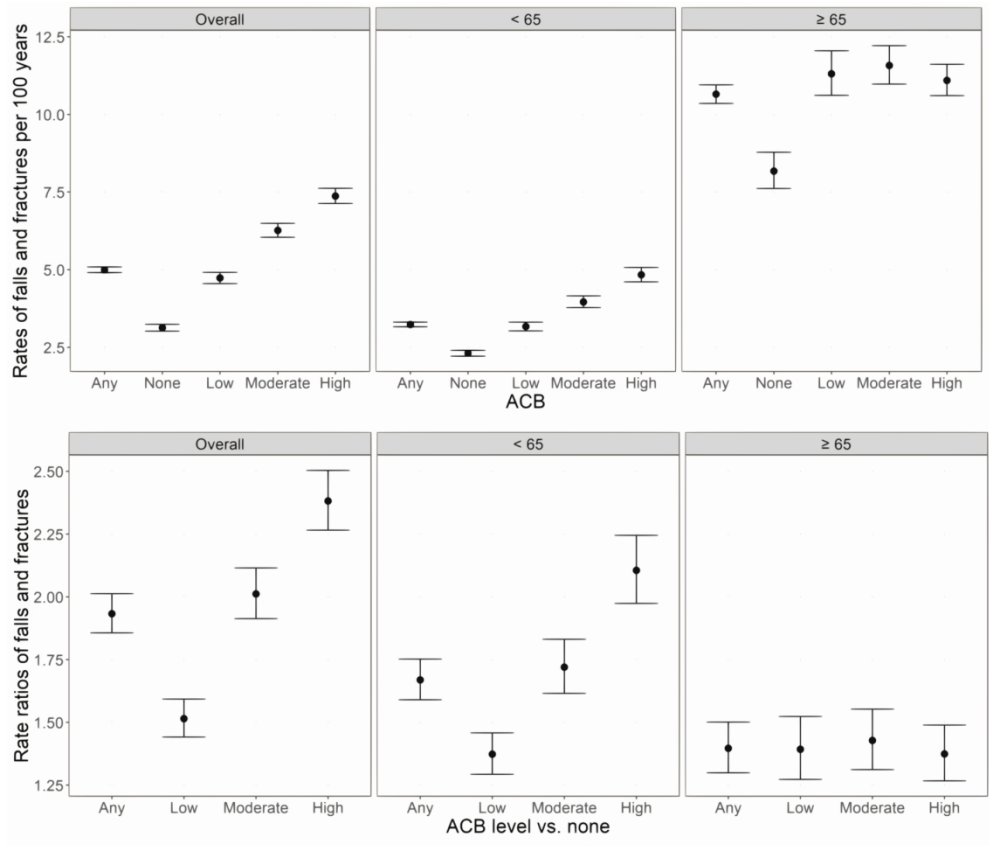

Rates\* (top), and rate ratios\* (bottom), for falls and fractures estimated over the study period among the OAB cohort, according to baseline anticholinergic burden, overall and according to age (<65 years vs. >65 years); Truven MarketScan databases 2007-2015

169x143mm (300 x 300 DPI)

**Supplementary Figure 1: Example trajectory and calculation of cumulative anticholinergic burden over time**

Steps to estimate cumulative anticholinergic exposure are:

- 1) determine the defined daily dose (DDD) of all medications considered by the ACB scale;
- 2) calculate the standardized daily dose (SDD) of the medication for each anticholinergic dispensing, as follows:  

$$SDD = \frac{\text{Number of daily doses} \times \text{Unit dose}}{DDD}$$
- 3) multiply the SDD by the ACB scale score of the medication dispensed to yield a drug and patient-specific measure of standardized daily anticholinergic exposure (SDACE);
- 4) add drug-specific SDACE at the patient level to account for coverage with multiple medications on a given day, to give a summated standardized daily anticholinergic exposure (SumSDACE);
- 5) calculate cumulative burden by summing SumSDACE for all days during the exposure period.

**Drug 1:**  
ACB score 2, prescribed at 1.5 x defined daily dose  
→ Adjusted score = 2 x 1.5 = 3

**Drug 2:**  
ACB score 1, prescribed at defined daily dose  
→ Adjusted score = 1 x 1 = 1

Example trajectory and calculation:

| Day                          | Day 1: initiate drug 1 |   |   |    | Day 5: initiate drug 2, continue drug 1 |       |       |       | Day 9: Discontinue drugs |
|------------------------------|------------------------|---|---|----|-----------------------------------------|-------|-------|-------|--------------------------|
|                              | 1                      | 2 | 3 | 4  | 5                                       | 6     | 7     | 8     | 9                        |
| Drug 1 (Adjusted score = 3)  | X                      | X | X | X  | X                                       | X     | X     | X     |                          |
| Drug 2 (Adjusted score = 1)  |                        |   |   |    | X                                       | X     | X     | X     |                          |
| SumSDACE                     | 3                      | 3 | 3 | 3  | 3+1=4                                   | 3+1=4 | 3+1=4 | 3+1=4 | 0                        |
| CumSDACE (Summed daily dose) | 3                      | 6 | 9 | 12 | 16                                      | 20    | 24    | 28    | 28                       |

Example trajectory and calculation of cumulative anticholinergic burden over time

226x190mm (300 x 300 DPI)

## Supplementary Table 1: CPT, NDC, ICD-9 and HCPCS codes to identify OAB, comorbidities and risk factors, and study outcomes

| Definition                                                                                                                                                                                                                                                                                                                                                                                                                                                                                                                                                                                                                                                                                                                                                                                                                                                                                                                                                                                                                                                                                                                                                                                                                                                                                                                                                                            | References                                                                                                                                                                                                                                                                                                                                             |
|---------------------------------------------------------------------------------------------------------------------------------------------------------------------------------------------------------------------------------------------------------------------------------------------------------------------------------------------------------------------------------------------------------------------------------------------------------------------------------------------------------------------------------------------------------------------------------------------------------------------------------------------------------------------------------------------------------------------------------------------------------------------------------------------------------------------------------------------------------------------------------------------------------------------------------------------------------------------------------------------------------------------------------------------------------------------------------------------------------------------------------------------------------------------------------------------------------------------------------------------------------------------------------------------------------------------------------------------------------------------------------------|--------------------------------------------------------------------------------------------------------------------------------------------------------------------------------------------------------------------------------------------------------------------------------------------------------------------------------------------------------|
| <b>Identify OAB</b>                                                                                                                                                                                                                                                                                                                                                                                                                                                                                                                                                                                                                                                                                                                                                                                                                                                                                                                                                                                                                                                                                                                                                                                                                                                                                                                                                                   |                                                                                                                                                                                                                                                                                                                                                        |
| <u>By diagnosis code:</u>                                                                                                                                                                                                                                                                                                                                                                                                                                                                                                                                                                                                                                                                                                                                                                                                                                                                                                                                                                                                                                                                                                                                                                                                                                                                                                                                                             | <u>References for OAB identified by diagnosis code:</u>                                                                                                                                                                                                                                                                                                |
| Other functional disorders of bladder (ICD9: 596.5),                                                                                                                                                                                                                                                                                                                                                                                                                                                                                                                                                                                                                                                                                                                                                                                                                                                                                                                                                                                                                                                                                                                                                                                                                                                                                                                                  | Chancellor MB, Migliaccio-Walle K, Bramley TJ, et al. Long-term patterns of use and treatment failure with anticholinergic agents for overactive bladder. <i>Clin Ther.</i> 2013;35(11):1744-1751.                                                                                                                                                     |
| Hypertonicity of the bladder (ICD9: 596.51)                                                                                                                                                                                                                                                                                                                                                                                                                                                                                                                                                                                                                                                                                                                                                                                                                                                                                                                                                                                                                                                                                                                                                                                                                                                                                                                                           |                                                                                                                                                                                                                                                                                                                                                        |
| Urinary incontinence unspecified (ICD9: 788.3)                                                                                                                                                                                                                                                                                                                                                                                                                                                                                                                                                                                                                                                                                                                                                                                                                                                                                                                                                                                                                                                                                                                                                                                                                                                                                                                                        | Pelletier EM, Vats V, Clemens JQ. Pharmacotherapy adherence and costs versus nonpharmacologic management in overactive bladder. <i>Am J Manag Care.</i> 2009;15(4 Suppl):S108-114.                                                                                                                                                                     |
| Urge incontinence (ICD9: 788.31)                                                                                                                                                                                                                                                                                                                                                                                                                                                                                                                                                                                                                                                                                                                                                                                                                                                                                                                                                                                                                                                                                                                                                                                                                                                                                                                                                      |                                                                                                                                                                                                                                                                                                                                                        |
| Mixed incontinence (ICD9: 788.33)                                                                                                                                                                                                                                                                                                                                                                                                                                                                                                                                                                                                                                                                                                                                                                                                                                                                                                                                                                                                                                                                                                                                                                                                                                                                                                                                                     | Scheife R, Takeda M. Central nervous system safety of anticholinergic drugs for the treatment of overactive bladder in the elderly. <i>Clinical Therapeutics.</i> 2005;27(2):144-153.                                                                                                                                                                  |
| Urinary frequency (ICD9: 788.41)                                                                                                                                                                                                                                                                                                                                                                                                                                                                                                                                                                                                                                                                                                                                                                                                                                                                                                                                                                                                                                                                                                                                                                                                                                                                                                                                                      |                                                                                                                                                                                                                                                                                                                                                        |
| Nocturia (ICD9: 788.43)                                                                                                                                                                                                                                                                                                                                                                                                                                                                                                                                                                                                                                                                                                                                                                                                                                                                                                                                                                                                                                                                                                                                                                                                                                                                                                                                                               | Yeaw J, Benner JS, Walt JG, Sian S, Smith DB. Comparing adherence and persistence across 6 chronic medication classes. <i>J Manag Care Pharm.</i> 2009;15(9):728-740.                                                                                                                                                                                  |
| Urgency of urination (ICD9: 788.63)                                                                                                                                                                                                                                                                                                                                                                                                                                                                                                                                                                                                                                                                                                                                                                                                                                                                                                                                                                                                                                                                                                                                                                                                                                                                                                                                                   |                                                                                                                                                                                                                                                                                                                                                        |
| Functional urinary incontinence (ICD9: 788.91)                                                                                                                                                                                                                                                                                                                                                                                                                                                                                                                                                                                                                                                                                                                                                                                                                                                                                                                                                                                                                                                                                                                                                                                                                                                                                                                                        |                                                                                                                                                                                                                                                                                                                                                        |
| <u>By drug code:</u>                                                                                                                                                                                                                                                                                                                                                                                                                                                                                                                                                                                                                                                                                                                                                                                                                                                                                                                                                                                                                                                                                                                                                                                                                                                                                                                                                                  | <u>References for OAB identified by drug code:</u>                                                                                                                                                                                                                                                                                                     |
| Darifenacin (NDC: 0430-0170, 0430-0171, 0591-4375, 0591-4380, 10370-170, 10370-171, 13668-202, 13668-203, 35356-272, 42291-206, 42291-207, 54868-5363, 54868-5704, 59746-516, 59746-517, 65862-861, 65862-862, 69097-431, 69097-432)                                                                                                                                                                                                                                                                                                                                                                                                                                                                                                                                                                                                                                                                                                                                                                                                                                                                                                                                                                                                                                                                                                                                                  | FDA-US Food and Drug administration. National Drug Code Directory. <a href="https://www.fda.gov/Drugs/InformationOnDrugs/ucm142438.htm">https://www.fda.gov/Drugs/InformationOnDrugs/ucm142438.htm</a>                                                                                                                                                 |
| Fesoterodine (NDC: 0069-0242, 0069-0244, 54868-6156, 54868-6175, 55154-2737, 55154-2738, 63539-183, 63539-242, 69189-0242, 69189-0244)                                                                                                                                                                                                                                                                                                                                                                                                                                                                                                                                                                                                                                                                                                                                                                                                                                                                                                                                                                                                                                                                                                                                                                                                                                                |                                                                                                                                                                                                                                                                                                                                                        |
| Flavoxate (NDC: 0574-0115, 24658-720, 42806-058, 50268-324, 51224-154, 54868-6326, 60429-290, 68151-3826)                                                                                                                                                                                                                                                                                                                                                                                                                                                                                                                                                                                                                                                                                                                                                                                                                                                                                                                                                                                                                                                                                                                                                                                                                                                                             |                                                                                                                                                                                                                                                                                                                                                        |
| Oxybutynin (NDC: 0023-5812, 0023-5861, 0093-5206, 0093-5207, 0093-5208, 0121-0671, 0179-0187, 0378-6015, 0378-6605, 0378-6610, 0378-6615, 0603-1491, 0603-4975, 0615-3512, 0615-7519, 0615-7520, 0615-7521, 0832-0038, 0904-2821, 0904-6570, 10135-609, 10135-610, 10135-611, 10147-0761, 10147-0771, 10147-0781, 10544-518, 10544-559, 11523-4311, 11523-4322, 16729-317, 16729-318, 16729-319, 17856-1491, 21695-406, 33261-342, 35356-909, 35356-958, 35356-991, 42291-633, 42291-634, 42291-635, 43063-145, 43353-367, 43353-769, 43353-978, 50090-0317, 50090-0318, 50090-2049, 50111-456, 50268-627, 50268-628, 50268-629, 50436-4777, 50458-805, 50458-810, 50458-815, 51079-722, 51079-723, 52544-041, 52544-084, 52544-166, 52544-920, 53808-0618, 53808-0747, 53808-0873, 54569-1990, 54838-510, 54868-2157, 54868-4502, 54868-4835, 54868-5728, 54868-5742, 54868-5743, 54868-6171, 55154-0657, 55154-5537, 55154-6298, 55154-6647, 55154-7225, 60432-092, 60760-980, 61786-605, 62175-270, 62175-271, 62175-272, 63187-749, 63629-1354, 63629-5484, 63629-6355, 63629-6434, 63739-548, 64980-209, 64980-210, 64980-211, 65162-371, 65162-372, 65162-373, 66336-604, 67296-1175, 68071-1875, 68071-2013, 68084-400, 68084-480, 68084-610, 68151-3646, 68788-6402, 69189-0581, 69189-5206, 69189-6605, 69189-6610, 70518-0158, 70518-0202, 76237-216, 76237-217, 76237-218) |                                                                                                                                                                                                                                                                                                                                                        |
| Solifenacin (NDC: 50090-0972, 51248-150, 51248-151, 54569-5790, 54868-4705, 54868-5398, 55154-3875, 55154-3876, 55154-3877, 55154-3878)                                                                                                                                                                                                                                                                                                                                                                                                                                                                                                                                                                                                                                                                                                                                                                                                                                                                                                                                                                                                                                                                                                                                                                                                                                               |                                                                                                                                                                                                                                                                                                                                                        |
| Tolterodine (NDC: 0009-4541, 0009-4544, 0009-5190, 0009-5191, 0093-0010, 0093-0018, 0093-2049, 0093-2050, 0093-2055, 0093-2056, 0093-7163, 0093-7164, 0378-3402, 0378-3404, 0378-5445, 0378-5446, 0904-6592, 0904-6593, 13668-189, 13668-190, 16590-959, 33342-097, 33342-098, 35356-417, 51079-197, 51079-198, 51079-235, 54868-4514, 54868-5126, 55154-3933, 55154-3935, 55289-132, 59762-0047, 59762-0048, 59762-0170, 59762-0800, 60429-825, 60429-826, 60505-3527, 60505-3528, 63629-5625, 68151-2049, 68151-4281, 69189-3404, 69189-5190)                                                                                                                                                                                                                                                                                                                                                                                                                                                                                                                                                                                                                                                                                                                                                                                                                                       |                                                                                                                                                                                                                                                                                                                                                        |
| Trospium (NDC: 0574-0118, 0574-0145, 0591-3636, 23155-530, 42291-846, 60429-098, 60429-103, 60505-3454, 68001-228, 68462-461, 69097-912)                                                                                                                                                                                                                                                                                                                                                                                                                                                                                                                                                                                                                                                                                                                                                                                                                                                                                                                                                                                                                                                                                                                                                                                                                                              |                                                                                                                                                                                                                                                                                                                                                        |
| Mirabegron/Myrbetriq (NDC: 00469-2601, 00469-2602)                                                                                                                                                                                                                                                                                                                                                                                                                                                                                                                                                                                                                                                                                                                                                                                                                                                                                                                                                                                                                                                                                                                                                                                                                                                                                                                                    |                                                                                                                                                                                                                                                                                                                                                        |
| OnabotulinumtoxinA/Botox (CPT: 52287)                                                                                                                                                                                                                                                                                                                                                                                                                                                                                                                                                                                                                                                                                                                                                                                                                                                                                                                                                                                                                                                                                                                                                                                                                                                                                                                                                 |                                                                                                                                                                                                                                                                                                                                                        |
| <b>Outcomes</b>                                                                                                                                                                                                                                                                                                                                                                                                                                                                                                                                                                                                                                                                                                                                                                                                                                                                                                                                                                                                                                                                                                                                                                                                                                                                                                                                                                       |                                                                                                                                                                                                                                                                                                                                                        |
| Fall (ICD9: E880-E886, E888, E998.0, E888.1, E888.8, E888.9)                                                                                                                                                                                                                                                                                                                                                                                                                                                                                                                                                                                                                                                                                                                                                                                                                                                                                                                                                                                                                                                                                                                                                                                                                                                                                                                          | Crispo JA, Willis AW, Thibault DP, et al. Associations between Anticholinergic Burden and Adverse Health Outcomes in Parkinson Disease. <i>PloS one.</i> 2016;11(3):e0150621.<br>Darkow T, Fontes CL, Williamson TE. Costs associated with the management of overactive bladder and related comorbidities. <i>Pharmacotherapy.</i> 2005;25(4):511-519. |



| Definition                                                                                                                                                                                                                                                                                                                                                                                                                                                                                                                                                                                                                                                                                                                                                                                                                                                                                                                                                                                                                                                                                                                                                                                                                                                                                                                                                                                                                                                               | References                                                                                                                                                                                                                                                                                                                                                                                                                                                                                                                                                                                                                                                                                                                                                                                                                                                                                                                                                                                                                                                                                                                                                                                                                                                                                                                                                                                                                                                                                                                                                                                                                                                                                                                                                                                                                                                                                                                                                                                                                                                                                                                                                                                                                                                                                                                                                                                                                                                                                                                                                                                                                                                                                                                                                                                                                                                                                                                                                                                                                                                                                                                                                                                                                                                                                                                                                                                                                                                                                                                                                                                                                                                                                                                                                                                                                                                                                                                                              |
|--------------------------------------------------------------------------------------------------------------------------------------------------------------------------------------------------------------------------------------------------------------------------------------------------------------------------------------------------------------------------------------------------------------------------------------------------------------------------------------------------------------------------------------------------------------------------------------------------------------------------------------------------------------------------------------------------------------------------------------------------------------------------------------------------------------------------------------------------------------------------------------------------------------------------------------------------------------------------------------------------------------------------------------------------------------------------------------------------------------------------------------------------------------------------------------------------------------------------------------------------------------------------------------------------------------------------------------------------------------------------------------------------------------------------------------------------------------------------|---------------------------------------------------------------------------------------------------------------------------------------------------------------------------------------------------------------------------------------------------------------------------------------------------------------------------------------------------------------------------------------------------------------------------------------------------------------------------------------------------------------------------------------------------------------------------------------------------------------------------------------------------------------------------------------------------------------------------------------------------------------------------------------------------------------------------------------------------------------------------------------------------------------------------------------------------------------------------------------------------------------------------------------------------------------------------------------------------------------------------------------------------------------------------------------------------------------------------------------------------------------------------------------------------------------------------------------------------------------------------------------------------------------------------------------------------------------------------------------------------------------------------------------------------------------------------------------------------------------------------------------------------------------------------------------------------------------------------------------------------------------------------------------------------------------------------------------------------------------------------------------------------------------------------------------------------------------------------------------------------------------------------------------------------------------------------------------------------------------------------------------------------------------------------------------------------------------------------------------------------------------------------------------------------------------------------------------------------------------------------------------------------------------------------------------------------------------------------------------------------------------------------------------------------------------------------------------------------------------------------------------------------------------------------------------------------------------------------------------------------------------------------------------------------------------------------------------------------------------------------------------------------------------------------------------------------------------------------------------------------------------------------------------------------------------------------------------------------------------------------------------------------------------------------------------------------------------------------------------------------------------------------------------------------------------------------------------------------------------------------------------------------------------------------------------------------------------------------------------------------------------------------------------------------------------------------------------------------------------------------------------------------------------------------------------------------------------------------------------------------------------------------------------------------------------------------------------------------------------------------------------------------------------------------------------------------------|
| <p>Fracture (ICD9: 733.1,* 733.93-733.98,* 800.x-829.x, E887; ICD9: 79.0-79.6; CPT: 21800, 21805, 21810, 21820, 21825, 22305,22310, 22318, 22319, 22520, 22521, 22523, 22524, 23500, 23505, 23515, 23570, 23575, 23585, 23600, 23605, 23615, 23616, 23620, 23625, 23630, 23665, 23670, 23675, 23680, 24500, 24505, 24515, 24516, 24530, 24535, 24538, 24545, 24546, 24560, 24565, 24566, 24575, 24576, 24577, 24579, 24582, 24620, 24635, 24650, 24655, 24665, 24666, 24670, 24675, 24685, 25500, 25505, 25515, 25520, 25525, 25526, 25530, 25535, 25545, 25560, 25565, 25574, 25575, 25600, 25605, 25606, 25607, 25608, 25609, 25622, 25624, 25628, 25630, 25635, 25645, 25650, 25651, 25652, 25680, 25685, 26600, 26605, 26607, 26608, 26615, 27193, 27194, 27200, 27202, 27215, 27216, 27217, 27218, 27220, 27222, 27226, 27227, 27228, 27230, 27232, 27235, 27236, 27238, 27240, 27244, 27245, 27246, 27248, 27254, 27267, 27268, 27269, 27500, 27501, 27502, 27503, 27506, 27507, 27508, 27509, 27510, 27511, 27513, 27514, 27520, 27524, 27530, 27532, 27535, 27536, 27538, 27540, 27750, 27752, 27756, 27758, 27759, 27760, 27762, 27766, 27767, 27768, 27769, 27780, 27781, 27784, 27786, 27788, 27792, 27808, 27810, 27814, 27816, 27818, 27822, 27823, 27824, 27825, 27826, 27827, 27828, 28400, 28405, 28406, 28415, 28420, 28430, 28435, 28436, 28445, 28450, 28455, 28456, 28465, 28470, 28475, 28476, 28485, 29850, 29851, 29855, 29856; HCPCS: S2360)</p> | <p>Kalliani L, Asgharnejad M, Palokangas T, Durgin T. Comparing the Incidence of Falls/Fractures in Parkinson's Disease Patients in the US Population. <i>PLoS one</i>. 2016;11(9):e0161689.</p> <p>Beydoun HA, Beydoun MA, Mishra NK, et al. Comorbid Parkinson's disease, falls and fractures in the 2010 National Emergency Department Sample. <i>Parkinsonism &amp; Related Disorders</i>. 2017;35:30-35.</p> <p>Lapane KL, Jesdale BM, Dubé CE, et al. Sulfonylureas and risk of falls and fractures among nursing home residents with type 2 diabetes mellitus. <i>Diabetes research and clinical practice</i>. 2015;109(2):411.</p> <p>Afroz PN, Bykowski MR, James IB, et al. The Epidemiology of Mandibular Fractures in the United States, Part 1: A Review of 13,142 Cases from the US National Trauma Data Bank. <i>Journal of oral and maxillofacial surgery</i>. 2015;73(12):2361.</p> <p>Kachroo S, Kawabata H, Colilla S, et al. Association between hypoglycemia and fall-related events in type 2 diabetes mellitus: analysis of a US commercial database. <i>Journal of managed care &amp; specialty pharmacy</i>. 2015;21(3):243-253.</p> <p>Clavijo-Alvarez JA, Deleyiannis FWB, Peitzman AB, Zenati MS. Risk factors for death in elderly patients with facial fractures secondary to falls. <i>The Journal of craniofacial surgery</i>. 2012;23(2):494-498.</p> <p>Kruschinski C, Sheehy O, Hummers-Pradier E, Leloir J. Fracture risk of patients suffering from dizziness: A retrospective cohort study. <i>European Journal of General Practice</i>. 2010;16(4):229-235.</p> <p>Wolinsky FD, Bentler SE, Liu L, et al. Recent hospitalization and the risk of hip fracture among older Americans. <i>The Journals of Gerontology Series A: Biological Sciences and Medical Sciences</i>. 2009;64(2):249-255.</p> <p>Schiff. Pregnancy outcomes following hospitalisation for a fall in Washington State from 1987 to 2004. <i>BJOG: An International Journal of Obstetrics &amp; Gynaecology</i>. 2008;115(13):1648-1654.</p> <p>Verma SK, Sorock GS, Pransky GS, Courtney TK, Smith GS. Occupational physical demands and same-level falls resulting in fracture in female workers: an analysis of workers' compensation claims. <i>Injury prevention</i>. 2007;13(1):32-36.</p> <p>Kamal-Bahl SJ, Stuart BC, Beers MH. Propoxyphene use and risk for hip fractures in older adults. <i>The American journal of geriatric pharmacotherapy</i>. 2006;4(3):219-226.</p> <p>Stevens JA, Powell KE, Smith SM, et al. Physical activity, functional limitations, and the risk of fall-related fractures in community-dwelling elderly. <i>Annals of epidemiology</i>. 1997;7(1):54-61.</p> <p>Ganz DA, Kim SB, Zingmond DS, et al. Effect of a Falls Quality Improvement Program on Serious Fall-Related Injuries. <i>Journal of the American Geriatrics Society</i>. 2015;63(1):63-70.</p> <p>Miller M, Stürmer T, Azrael D, et al. Opioid analgesics and the risk of fractures in older adults with arthritis. <i>Journal of the American Geriatrics Society</i>. 2011;59(3):430-438.</p> <p>Shah M, Chaudhari S, McLaughlin TP, et al. Cumulative burden of oral corticosteroid adverse effects and the economic implications of corticosteroid use in patients with systemic lupus erythematosus. <i>Clinical therapeutics</i>. 2013;35(4):486.</p> <p>Curtis JR, Mudano AS, Solomon DH, et al. Identification and validation of vertebral compression fractures using administrative claims data. <i>Medical care</i>. 2009;47(1):69.</p> <p>Roudsari BS, Ebel BE, Corso PS, et al. The acute medical care costs of fall-related injuries among the US older adults. <i>Injury</i>. 2005;36(11):1316-1322.</p> <p>Pan H-H, Li C-Y, Chen T-J, Su T-P, Wang K-Y. Association of polypharmacy with fall-related fractures in older Taiwanese people: age- and gender-specific analyses. <i>BMJ open</i>. 2014;4(3):e004428.</p> |
| <p><b>Comorbidities and falls/fractures risk factors</b></p> <p>Age, sex (Demographic characteristics)</p> <p>Cognitive impairment (ICD9: 331.x)</p> <p>Dementia (ICD9: 290.x, 294.1, 331.2)</p> <p>Alzheimer's disease (ICD9: 331.0)</p> <p>Hypertension, uncomplicated (ICD9: 401.x, ICD9: 402.x-405.x)</p> <p>Cerebrovascular disease and Stroke (ICD9: 430.x-438.x)</p> <p>Parkinson's disease and other neurologic impairments (ICD9: 332.x, 331.9, 333.4, 333.5, 333.92, 334.x-335.x, 336.2, 340.x, 341.x, 345.x, 348.1, 348.3, 780.3, 784.3)</p>                                                                                                                                                                                                                                                                                                                                                                                                                                                                                                                                                                                                                                                                                                                                                                                                                                                                                                                  | <p>Vaughan CP, Brown CJ, Goode PS, et al. The association of nocturia with incident falls in an elderly community-dwelling cohort. <i>Int J Clin Pract</i>. 2010;64(5):577-583.</p> <p>Tinetti ME, Speechley M, Ginter SF. Risk factors for falls among elderly persons living in the community. <i>N Engl J Med</i>. 1988;319(26):1701-1707.</p> <p>Nevitt MC, Cummings SR, Hudes ES. Risk factors for injurious falls: a prospective study. <i>J Gerontol</i>. 1991;46(5):M164-170</p> <p>Muir SW, Gopaul K, Montero Odasso MM. The role of cognitive impairment in fall risk among older adults: a systematic review and meta-analysis. <i>Age Ageing</i>. 2012;41(3):299-308.</p>                                                                                                                                                                                                                                                                                                                                                                                                                                                                                                                                                                                                                                                                                                                                                                                                                                                                                                                                                                                                                                                                                                                                                                                                                                                                                                                                                                                                                                                                                                                                                                                                                                                                                                                                                                                                                                                                                                                                                                                                                                                                                                                                                                                                                                                                                                                                                                                                                                                                                                                                                                                                                                                                                                                                                                                                                                                                                                                                                                                                                                                                                                                                                                                                                                                                   |



| Definition                                                                                                                                                                                 | References                                                                                                                                                                                                                                                                                                           |
|--------------------------------------------------------------------------------------------------------------------------------------------------------------------------------------------|----------------------------------------------------------------------------------------------------------------------------------------------------------------------------------------------------------------------------------------------------------------------------------------------------------------------|
| 1 Palmomental reflex (ICD9: 796.1)                                                                                                                                                         | Nakagawa H, Niu K, Hozawa A, et al. Impact of nocturia on bone fracture and mortality in older individuals: a Japanese longitudinal cohort study. <i>J Urol</i> . 2010;184(4):1413-1418                                                                                                                              |
| 2 Decreased vision (ICD9: 369.x)                                                                                                                                                           | Pan H-H, Li C-Y, Chen T-J, Su T-P, Wang K-Y. Association of polypharmacy with fall-related fractures in older Taiwanese people: age-and gender-specific analyses. <i>BMJ open</i> . 2014;4(3):e004428.                                                                                                               |
| 3 Alcohol abuse (ICD9: 265.2, 291.1-291.3, 291.5-291.9, 303.0, 303.9, 305.0, 357.5, 425.5, 535.3, 571.0-571.3, 980.x, V11.3)                                                               | Tinetti ME, Speechley M, Ginter SF. Risk factors for falls among elderly persons living in the community. <i>New England journal of medicine</i> . 1988;319(26):1701-1707.                                                                                                                                           |
| 4 Osteoporosis (ICD9: 733.0x)                                                                                                                                                              | Centers for Medicare & Medicaid Services. ICD-9-CM Diagnosis and Procedure Codes: Abbreviated and Full Code Titles. <a href="https://www.cms.gov/medicare/coding/ICD9providerdiagnosticcodes/codes.html">https://www.cms.gov/medicare/coding/ICD9providerdiagnosticcodes/codes.html</a> . Accessed November 07 2016. |
| 5 Chronic kidney disease (ICD9: 403.x, 585.x)                                                                                                                                              | Bynum JP, Rabins PV, Weller W, et al. The relationship between a dementia diagnosis, chronic illness, Medicare expenditures, and hospital use. <i>Journal of the American Geriatrics Society</i> . 2004;52(2):187-194.                                                                                               |
| 6 Hyperparathyroidism (ICD9: 252.0x, 588.81)                                                                                                                                               | Hamill BG, Curtis LH, Schulman KA, Whellan DJ. Relationship between cardiac rehabilitation and long-term risks of death and myocardial infarction among elderly Medicare beneficiaries. <i>Circulation</i> . 2010;121(1):63-70.                                                                                      |
| 7 Dizziness (ICD9: 780.4)                                                                                                                                                                  | Forbes WF, McLachlan DR. Further thoughts on the aluminum-Alzheimer's disease link. <i>Journal of Epidemiology and Community Health</i> . 1996;50(4):401-403.                                                                                                                                                        |
| 8 Depression, neurotic disorders, or psychosis (ICD9: 293.8, 295-299, 300-309, 311, E937.x)                                                                                                | Mustard CA, Mayer T. Case-Control Study of Exposure to Medication and the Risk of Injurious Falls Requiring Hospitalization among Nursing Home Residents. <i>American Journal of Epidemiology</i> . 1997;145(8):738-745.                                                                                             |
| 9 Arthritis (ICD9: 446.x, 701.0, 710.0-710.4, 710.8, 710.9, 711.2, 714.x, 719.3, 720.x, 725.x, 728.5, 728.89, 729.30)                                                                      | Goldstein LB. Accuracy of ICD-9-CM coding for the identification of patients with acute ischemic stroke: effect of modifier codes. <i>Stroke; a journal of cerebral circulation</i> . 1998;29(8):1602-1604.                                                                                                          |
| 10 Hypotension (ICD9: 796.3)                                                                                                                                                               | Quan H, Sundararajan V, Halfon P, et al. Coding algorithms for defining comorbidities in ICD-9-CM and ICD-10 administrative data. <i>Medical care</i> . 2005;1130-1139.                                                                                                                                              |
| 11 Diabetes mellitus and diabetic peripheral neuropathy (ICD9: 250.x, 357.2)                                                                                                               | Johnston S, Conner C, Aagren M, Ruiz K, Bouchard J. Association between hypoglycaemic events and fall-related fractures in Medicare-covered patients with type 2 diabetes. <i>Diabetes, Obesity and Metabolism</i> . 2012;14(7):634-643.                                                                             |
| 12 Leg and foot amputation (ICD9: 896.x, 897.x)                                                                                                                                            | Teng Z, Zhu Y, Wu F, et al. Opioids Contribute to Fracture Risk: A Meta-Analysis of 8 Cohort Studies: e0128232. <i>PLoS One</i> . 2015;10(6).                                                                                                                                                                        |
| 13 Musculoskeletal problems (ICD9: 306.0, 723.9, 729.89)                                                                                                                                   |                                                                                                                                                                                                                                                                                                                      |
| 14 Syncope/fainting (ICD9: 780.2)                                                                                                                                                          |                                                                                                                                                                                                                                                                                                                      |
| 15 Prior (serious) falls or fractures within the preceding year <b>Various:</b> (see outcomes listed above)                                                                                |                                                                                                                                                                                                                                                                                                                      |
| 16 Opioids ( <b>NDC:</b> codes for Opioids [full list available upon request])                                                                                                             |                                                                                                                                                                                                                                                                                                                      |
| 17 Benzodiazepines ( <b>NDC:</b> codes for Benzodiazepines [full list available upon request])                                                                                             |                                                                                                                                                                                                                                                                                                                      |
| 18 Smoking (by proxy codes, and COPD (see below) (ICD9: 649.0x, 305.1x, V15.82<br><b>CPT:</b> 1034F, 4000F, 4001F, 99406, 99407<br><b>HCPCS:</b> D1320, G8402, G8403, G8453, G8454, G8455) |                                                                                                                                                                                                                                                                                                                      |
| 19 COPD (ICD9: 490.x, 491.x, 492.x, 494.x, 496.x)                                                                                                                                          |                                                                                                                                                                                                                                                                                                                      |
| 20 Internal motility disorders (ICD9: 564.89)                                                                                                                                              |                                                                                                                                                                                                                                                                                                                      |
| 21 Chronic use of inhaled or oral corticosteroids ( <b>NDC:</b> codes for inhaled or oral corticosteroids [full list available upon request])                                              |                                                                                                                                                                                                                                                                                                                      |
| 22 Chronic was defined a days supply of ≥90 over one year                                                                                                                                  |                                                                                                                                                                                                                                                                                                                      |

NDC: National drug code; ICD-9: International Classification of Diseases (9th Edition); CPT: Common Procedural Code; HCPCS: Healthcare Common Procedure Coding System  
 \*Pathophysiologic fractures, stress fractures, and fracture due to motor vehicle accident were excluded in the base case analysis.

**Supplementary Table 2: Results from the (left) Cox model and (right) marginal structural model estimating the association between falls and fractures and anticholinergic burden, adjusted for important confounders and OAB status (N = 129,249)**

|                                                                    | Cox model results |         | MSM results    |         |
|--------------------------------------------------------------------|-------------------|---------|----------------|---------|
|                                                                    | HR (95%CI)        | p-value | HR (95%CI)     | p-value |
| <b>By anticholinergic burden level vs. no burden</b>               |                   |         |                |         |
| Low                                                                | 1.2 (1.1, 1.4)    | <0.001  | 1.2 (1.1, 1.3) | <0.001  |
| Medium                                                             | 1.3 (1.2, 1.4)    | <0.001  | 1.3 (1.2, 1.4) | <0.001  |
| High                                                               | 1.4 (1.3, 1.5)    | <0.001  | 1.5 (1.4, 1.6) | <0.001  |
| <b>By age category vs. ≤45</b>                                     |                   |         |                |         |
| 46 to 55                                                           | 1.3 (1.2, 1.4)    | <0.001  |                |         |
| 56 to 65                                                           | 1.5 (1.4, 1.6)    | <0.001  |                |         |
| 66 to 75                                                           | 2.1 (2.0, 2.3)    | <0.001  |                |         |
| 76 to 85                                                           | 3.3 (3.1, 3.5)    | <0.001  |                |         |
| 86+                                                                | 4.0 (4.1, 4.8)    | <0.001  |                |         |
| <b>Sex</b>                                                         |                   |         |                |         |
| Female vs. male                                                    | 1.5 (1.5, 1.6)    | <0.001  |                |         |
| <b>Comorbidity categories at baseline</b>                          |                   |         |                |         |
| Cardiovascular diseases*                                           | 1.1 (1.1, 1.2)    | <0.001  |                |         |
| Neurologic impairments                                             | 1.5 (1.4, 1.6)    | <0.001  |                |         |
| Endocrine, nutritional and metabolic disease                       | 1.2 (1.1, 1.3)    | <0.001  |                |         |
| Cardiovascular disease X Neurologic impairments                    | 1.1 (1.0, 1.0)    | 0.224   |                |         |
| Cardiovascular disease X Endocrine, nutritional, metabolic disease | 0.9 (0.9, 1.1)    | 0.141   |                |         |
| Neurologic impairments X Endocrine, nutritional, metabolic disease | 1.0 (0.9, 1.1)    | 0.931   |                |         |
| <b>OAB</b>                                                         |                   |         |                |         |
| No OAB vs. OAB (OAB is the reference)                              | 0.7 (0.7, 0.8)    | <0.001  | 0.8 (0.7, 0.8) | <0.001  |
| <b>Interaction between anticholinergic burden and OAB</b>          |                   |         |                |         |
| Low anticholinergic burden X no OAB                                | 1.2 (1.1, 1.3)    | 0.004   | 1.1 (1.0, 1.3) | 0.051   |
| Medium anticholinergic burden X no OAB                             | 1.1 (1.1, 1.2)    | 0.035   | 1.1 (1.0, 1.2) | 0.098   |
| High anticholinergic burden X no OAB                               | 1.2 (1.1, 1.4)    | <0.001  | 1.1 (1.0, 1.3) | 0.045   |

HR: hazard ratio; OAB: overactive bladder; MSM: marginal structural model.\*Cardiovascular disease = cerebrovascular disease + stroke

**Cumulative anticholinergic burden is associated with falls and fractures in overactive bladder: A retrospective cohort study**

Shelagh M. Szabo MSc, Katherine Gooch PhD, Carol R. Schermer MD MPH, David Walker PhD, Greta Lozano-Ortega MSc, Basia Rogula MSc, Alison Deighton BSc Edward Vonesh PhD, Noll L. Campbell PharmD MS.

STROBE Statement—Checklist of items that should be included in reports of *cohort studies*

|                              | Item No | Recommendation                                                                                                                                                                                                                            | ✓ Pg. No                               |
|------------------------------|---------|-------------------------------------------------------------------------------------------------------------------------------------------------------------------------------------------------------------------------------------------|----------------------------------------|
| <b>Title and abstract</b>    | 1       | (a) Indicate the study's design with a commonly used term in the title or the abstract                                                                                                                                                    | ✓ Pg. 1                                |
|                              |         | (b) Provide in the abstract an informative and balanced summary of what was done and what was found                                                                                                                                       | ✓ Pg. 1                                |
| <b>Introduction</b>          |         |                                                                                                                                                                                                                                           |                                        |
| Background/rationale         | 2       | Explain the scientific background and rationale for the investigation being reported                                                                                                                                                      | ✓ Pg. 4                                |
| Objectives                   | 3       | State specific objectives, including any prespecified hypotheses                                                                                                                                                                          | ✓ Pg. 5                                |
| <b>Methods</b>               |         |                                                                                                                                                                                                                                           |                                        |
| Study design                 | 4       | Present key elements of study design early in the paper                                                                                                                                                                                   | ✓ Pg. 5                                |
| Setting                      | 5       | Describe the setting, locations, and relevant dates, including periods of recruitment, exposure, follow-up, and data collection                                                                                                           | ✓ Pg. 5                                |
| Participants                 | 6       | (a) Give the eligibility criteria, and the sources and methods of selection of participants. Describe methods of follow-up                                                                                                                | ✓ Pg. 5                                |
|                              |         | (b) For matched studies, give matching criteria and number of exposed and unexposed                                                                                                                                                       | ✓ pg.6                                 |
| Variables                    | 7       | Clearly define all outcomes, exposures, predictors, potential confounders, and effect modifiers. Give diagnostic criteria, if applicable                                                                                                  | ✓ pg.7                                 |
| Data sources/<br>measurement | 8*      | For each variable of interest, give sources of data and details of methods of assessment (measurement). Describe comparability of assessment methods if there is more than one group                                                      | ✓ Pg. 5                                |
| Bias                         | 9       | Describe any efforts to address potential sources of bias<br><i>We varied multiple parameters in sensitivity analyses to assess the potential impact of bias and only reported the most important here (see also limitations section)</i> | ✓ Pg.8,9                               |
| Study size                   | 10      | Explain how the study size was arrived at                                                                                                                                                                                                 | ✓ Pg.6,7                               |
| Quantitative variables       | 11      | Explain how quantitative variables were handled in the analyses. If applicable, describe which groupings were chosen and why                                                                                                              | ✓ Pg. 8                                |
| Statistical methods          | 12      | (a) Describe all statistical methods, including those used to control for confounding                                                                                                                                                     | ✓ Pg. 8,9                              |
|                              |         | (b) Describe any methods used to examine subgroups and interactions                                                                                                                                                                       | ✓ Pg. 9                                |
|                              |         | (c) Explain how missing data were addressed                                                                                                                                                                                               | n/a (incomplete records were excluded) |
|                              |         | (d) If applicable, explain how loss to follow-up was addressed                                                                                                                                                                            | n/a                                    |
|                              |         | (e) Describe any sensitivity analyses                                                                                                                                                                                                     | ✓ Pg. 8,9                              |
| <b>Results</b>               |         |                                                                                                                                                                                                                                           |                                        |
| Participants                 | 13*     | (a) Report numbers of individuals at each stage of study—eg numbers potentially eligible, examined for eligibility, confirmed eligible, included in the study, completing follow-up, and analysed                                         | ✓ Pg. 7,9                              |
|                              |         | (b) Give reasons for non-participation at each stage                                                                                                                                                                                      | n/a                                    |

**Cumulative anticholinergic burden is associated with falls and fractures in overactive bladder: A retrospective cohort study**

Shelagh M. Szabo MSc, Katherine Gooch PhD, Carol R. Schermer MD MPH, David Walker PhD, Greta Lozano-Ortega MSc, Basia Rogula MSc, Alison Deighton BSc Edward Vonesh PhD, Noll L. Campbell PharmD MS.

|                          |     |                                                                                                                                                                                                              |                       |
|--------------------------|-----|--------------------------------------------------------------------------------------------------------------------------------------------------------------------------------------------------------------|-----------------------|
|                          |     | (c) Consider use of a flow diagram                                                                                                                                                                           | n/a                   |
| Descriptive data         | 14* | (a) Give characteristics of study participants (eg demographic, clinical, social) and information on exposures and potential confounders                                                                     | ✓ Pg. 9,10<br>Table 1 |
|                          |     | (b) Indicate number of participants with missing data for each variable of interest                                                                                                                          | n/a                   |
|                          |     | (c) Summarise follow-up time (eg, average and total amount)                                                                                                                                                  | ✓ Pg. 5               |
|                          |     | <i>Minimum 1 year, up to 8 years, impact of varying follow up times was directly incorporated into analyses</i>                                                                                              |                       |
| Outcome data             | 15  | Report numbers of outcome events or summary measures over time                                                                                                                                               | ✓ Pg. 10              |
| Main results             | 16  | (a) Give unadjusted estimates and, if applicable, confounder-adjusted estimates and their precision (eg, 95% confidence interval). Make clear which confounders were adjusted for and why they were included | ✓ Pg. 10-12           |
|                          |     | (b) Report category boundaries when continuous variables were categorized                                                                                                                                    | ✓ Pg. 7-8             |
|                          |     | (c) If relevant, consider translating estimates of relative risk into absolute risk for a meaningful time period                                                                                             | ✓ Tables 2 & 3        |
| Other analyses           | 17  | Report other analyses done—eg analyses of subgroups and interactions, and sensitivity analyses                                                                                                               | ✓ pg. 11              |
| <b>Discussion</b>        |     |                                                                                                                                                                                                              |                       |
| Key results              | 18  | Summarise key results with reference to study objectives                                                                                                                                                     | ✓ pg. 12              |
| Limitations              | 19  | Discuss limitations of the study, taking into account sources of potential bias or imprecision. Discuss both direction and magnitude of any potential bias                                                   | ✓ pg. 13              |
| Interpretation           | 20  | Give a cautious overall interpretation of results considering objectives, limitations, multiplicity of analyses, results from similar studies, and other relevant evidence                                   | ✓ pg. 14              |
| Generalisability         | 21  | Discuss the generalisability (external validity) of the study results                                                                                                                                        | ✓ pg. 14              |
| <b>Other information</b> |     |                                                                                                                                                                                                              |                       |
| Funding                  | 22  | Give the source of funding and the role of the funders for the present study and, if applicable, for the original study on which the present article is based                                                | ✓ Pg. 20              |

# BMJ Open

## The association between cumulative anticholinergic burden and falls and fractures in patients with overactive bladder: A US-based retrospective cohort study

|                                 |                                                                                                                                                                                                                                                                                                                                                                                                                                                                                                  |
|---------------------------------|--------------------------------------------------------------------------------------------------------------------------------------------------------------------------------------------------------------------------------------------------------------------------------------------------------------------------------------------------------------------------------------------------------------------------------------------------------------------------------------------------|
| Journal:                        | <i>BMJ Open</i>                                                                                                                                                                                                                                                                                                                                                                                                                                                                                  |
| Manuscript ID                   | bmjopen-2018-026391.R1                                                                                                                                                                                                                                                                                                                                                                                                                                                                           |
| Article Type:                   | Research                                                                                                                                                                                                                                                                                                                                                                                                                                                                                         |
| Date Submitted by the Author:   | 19-Dec-2018                                                                                                                                                                                                                                                                                                                                                                                                                                                                                      |
| Complete List of Authors:       | Szabo, Shelagh M; Broadstreet HEOR, Gooch, Katherine; Astellas Pharma Global Development Inc<br>Schermer, Carol; Astellas Pharma Global Development Inc<br>Walker, David; Astellas Pharma Global Development Inc<br>Lozano-Ortega, G; Broadstreet HEOR<br>Rogula, Basia; Broadstreet HEOR<br>Deighton, Alison; Broadstreet HEOR<br>Vonesh, Edward; Northwestern University Feinberg School of Medicine<br>Campbell, Noll; Purdue University College of Pharmacy, Department of Pharmacy Practice |
| <b>Primary Subject Heading</b>: | Pharmacology and therapeutics                                                                                                                                                                                                                                                                                                                                                                                                                                                                    |
| Secondary Subject Heading:      | Urology, Geriatric medicine, Epidemiology                                                                                                                                                                                                                                                                                                                                                                                                                                                        |
| Keywords:                       | Anticholinergic burden, overactive bladder, falls, fractures, observational study, marginal structural models                                                                                                                                                                                                                                                                                                                                                                                    |
|                                 |                                                                                                                                                                                                                                                                                                                                                                                                                                                                                                  |

SCHOLARONE™  
Manuscripts

1  
2  
3  
4 **The association between cumulative anticholinergic burden and falls and fractures in patients with**  
5  
6 **overactive bladder: A US-based retrospective cohort study**  
7

8 Shelagh M. Szabo MSc,<sup>1</sup> Katherine Gooch PhD,<sup>2</sup> Carol R. Schermer MD MPH,<sup>2</sup> David Walker PhD,<sup>2</sup>

9  
10 Greta Lozano-Ortega MSc,<sup>1</sup> Basia Rogula MSc,<sup>1</sup> Alison Deighton BSc,<sup>1</sup> Edward Vonesh PhD,<sup>3</sup> Noll L.

11  
12 Campbell PharmD MS.<sup>4</sup>  
13  
14

15 <sup>1</sup>Broadstreet Health Economics & Outcomes Research, 301 - 343 Railway St, Vancouver, BC, V6A 1A4,  
16 Canada

17 S M Szabo, Principal

18 G Lozano-Ortega, Director

19 B Rogula, Senior Statistician

20 A Deighton, Research Analyst  
21  
22

23 <sup>2</sup>Astellas Pharma Global Development Inc., 1 Astellas Way, Northbrook, IL, 60062, USA

24 K Gooch, Senior Director

25 C Schermer, Senior Medical Director

26 D Walker, Director  
27  
28

29 <sup>3</sup>Department of Preventive Medicine, Feinberg School of Medicine, 420 E Superior St, Chicago, IL  
30 60611, USA

31 E Vonesh, Adjunct Professor  
32  
33

34 <sup>4</sup>College of Pharmacy, Purdue University, 575 Stadium Mall Drive, West Lafayette, IN 47907, USA

35 N Campbell, Assistant Professor  
36  
37  
38

39 **Corresponding author:**  
40

41 Shelagh M. Szabo

42 Telephone: 604 800 0648

43 Email: [sszabo@broadstretheor.com](mailto:sszabo@broadstretheor.com)  
44  
45  
46

47 **Word count: 4,376**

48 **Abstract word count: 299/300**  
49

50 **Number of pages (11), references (47), figures (2) and tables (3)**  
51  
52  
53  
54  
55  
56  
57  
58  
59  
60

1  
2  
3 **Key words:** Anticholinergic burden; overactive bladder; falls; fractures; observational study; marginal  
4 structural models.  
5  
6  
7  
8  
9  
10  
11  
12  
13  
14  
15  
16  
17  
18  
19  
20  
21  
22  
23  
24  
25  
26  
27  
28  
29  
30  
31  
32  
33  
34  
35  
36  
37  
38  
39  
40  
41  
42  
43  
44  
45  
46  
47  
48  
49  
50  
51  
52  
53  
54  
55  
56  
57  
58  
59  
60

For peer review only

## ABSTRACT

**Objective:** To estimate the association between cumulative anticholinergic burden and falls and fractures in patients with overactive bladder (OAB).

**Design:** A retrospective claims-based study (2007-2015) of patients with OAB; outcomes from a subset were contrasted to a non-OAB comparison.

**Setting:** United States, commercially- and Medicare-insured population.

**Participants:** 154,432 adults with OAB and 86,966 adults without OAB; mean age of 56 years, and 67.9% female.

**Main outcome measures:** Cumulative anticholinergic burden, a unitless value representing exposure over time, was estimated over the 12-months pre-index ('at baseline'), and every 6 months post-index. Burden was categorized as no (0), low (1-89), medium (90-499), or high (500+). Unadjusted rates of falls or fractures were estimated, and the increased risk associated with anticholinergic burden (measured at the closest 6-month interval prior to a fall/fracture) was assessed using Cox proportional hazards and marginal structural models.

**Results:** Median (IQR) baseline anticholinergic burden was 30 (0.0-314.0), and higher among older ( $\geq 65$  years; 183 [3.0-713.0]) vs. younger ( $< 65$  years; 13 [0.0-200.0]) adults. The unadjusted rate (95% CI) of falls or fractures over the period was 5.0 per 100 patient-years, ranging from 3.1 (3.0-3.2) for those with no, to 7.4 (7.1-7.6) for those with high burden at baseline. The adjusted risk of falls and fractures was greater with higher anticholinergic burden in the previous 6 months, with a hazard ratio (95% CI) of 1.2 (1.2-1.3) for low vs. no, to 1.4 (1.3-1.4) for high vs. no burden. Estimates from marginal structural models adjusting for time-varying covariates were lower, but remained significantly higher with higher anticholinergic burden. Rates of falls and fractures were approximately 40% higher among those with OAB (vs. those without).

**Conclusion:** Higher levels of anticholinergic burden are associated with higher rates of falls and fractures, highlighting the importance of considering anticholinergic burden when treating patients with OAB.



1  
2  
3  
4  
5  
6  
7  
8  
9  
10  
11  
12  
13  
14  
15  
16  
17  
18  
19  
20  
21  
22  
23  
24  
25  
26  
27  
28  
29  
30  
31  
32  
33  
34  
35  
36  
37  
38  
39  
40  
41  
42  
43  
44  
45  
46  
47  
48  
49  
50  
51  
52  
53  
54  
55  
56  
57  
58  
59  
60

For peer review only

## STRENGTHS AND LIMITATIONS OF THIS STUDY

- This is the first study to demonstrate the association of higher cumulative anticholinergic burden with a higher risk of falls and fractures among those with OAB.
- This study contributes evidence to help inform the appropriate use of anticholinergic medications, both among younger and older patients with OAB who have a higher comorbidity burden.
- The use of a validated generalizable dataset with a large sample size allowed for the calculation of precise estimates of risk and an understanding of the interplay of factors contributing to falls and fractures.
- As with any retrospective study, the findings are limited by the data and duration of follow-up available.
- The findings are also restricted due to the inherent limitations from the use of claims data.

## INTRODUCTION

Falls and fractures, which are major causes of morbidity and mortality among older adults,<sup>1 2</sup> have numerous risk factors, both intrinsic and extrinsic.<sup>2-12</sup> Interactions between one or more of these factors are also important contributors to fall risk.<sup>12-14</sup> Overactive bladder (OAB) is a symptom complex including urinary urgency, as well as urinary incontinence and nocturia, symptoms which are intrinsic risk factors for falls or fractures.<sup>11-13 15-17</sup> While many patients manage their OAB symptoms with lifestyle modifications alone,<sup>18</sup> among those requiring pharmacotherapy most will initially be treated with anticholinergic medications called antimuscarinics.<sup>19</sup> Cumulative or prolonged exposure to the broader class of anticholinergic medications, which are widely used to manage patients across a variety of health conditions, is also a risk factor for falls and fractures even among populations already at higher risk.<sup>3-7</sup>

To date, studies have infrequently evaluated the impact of OAB treatment<sup>17 20</sup> and never the impact of anticholinergic burden on falls and fractures among those with OAB.<sup>21 22</sup> Few randomized trials of antimuscarinic treatments report the occurrence of falls and those that do, do not report significant differences between OAB treatments or placebo.<sup>23-25</sup> One observational study examining OAB treatments and falls and fractures reported no difference in rates among over 100,000 patients initiating two different antimuscarinics over their first 90 days of treatment; though follow-up times were short.<sup>20</sup> Another reported a slightly protective effect of OAB treatment on falls; but did not measure fractures, nor the intensity of, duration of, or adherence to OAB treatments.<sup>17</sup> However, the impact of anticholinergic burden on falls and fractures risk in OAB would not be driven by antimuscarinic use only, but rather from the total of all prescribed anticholinergic medications; to the best of our knowledge, this has not yet been examined.

Understanding the magnitude of the association between anticholinergic burden and falls and fractures among those with OAB is important for several reasons. First, OAB is highly prevalent, particularly among older adults, affecting up to 18.5% of adults over 40 years of age.<sup>26</sup> Second, the high frequency of major risk factors for falls and fractures (including older age, urinary symptoms<sup>11-13</sup> and gait problems)<sup>27</sup> among those with OAB contribute to an approximately 33% increased risk of falls compared to those without OAB,<sup>28</sup> independent of

1  
2  
3 any incremental risk possibly conveyed by anticholinergic burden. However, if antimuscarinics successfully  
4 manage the symptoms of OAB that are themselves risk factors for falls, it is conceivable that falls and fractures  
5 risk in patients with OAB treated with antimuscarinics could be attenuated.<sup>17</sup> Alternatively, anticholinergic  
6 burden could act as an effect modifier of the relationship between OAB symptoms and risk of falls or fractures,  
7 such that its impact would be more or less pronounced among different subgroups of OAB patients. Finally,  
8 unlike certain fall risk factors such as older age or sex, anticholinergic burden is potentially modifiable and at-  
9 risk patients with OAB could be managed by treatments that do not act by the anticholinergic pathway. Due to  
10 the multifactorial nature of falls and fractures risk,<sup>14</sup> the application of rigorous statistical techniques is  
11 required to appropriately control for potential confounders while estimating the association between time-  
12 varying exposures like anticholinergic burden and relevant outcomes.

13  
14  
15  
16  
17  
18  
19  
20  
21  
22  
23  
24 The objective of this study was to estimate the association between anticholinergic burden and falls and  
25 fractures among individuals with OAB. A secondary objective was to compare rates of falls and fractures  
26 among those with OAB to an age- and sex-matched sample without OAB. These data will be important to help  
27 formulate treatment recommendations for patients with OAB at higher falls and fractures risk.

## 36 **METHODS**

### 38 **Study design**

39  
40  
41 This retrospective cohort study used the Truven MarketScan claims databases from the United States (US);  
42 large, nationally-representative healthcare datasets of Commercial Claims and Encounters (Commercial) and  
43 patients insured through Medicare Supplemental and Coordination of Benefits (Medicare Supplemental).  
44 These databases contain individual linked data for over 84 million people, allowing characterization of patient  
45 populations, treatment patterns, clinical outcomes and healthcare resource use (including medication fills).<sup>29</sup>

1  
2  
3 These data have been widely validated for clinical, pharmacoepidemiologic and pharmaco-economic  
4 research.<sup>30-32</sup>  
5  
6

7  
8 The study period was January 2007 to December 2015. For the core analyses, the identification period for  
9 enrolment was from January 2008 to December 2014, to allow  $\geq 1$  year of pre-enrolment data per person for  
10 summarizing baseline characteristics, determining whether an individual is an incident or prevalent case of  
11 OAB (see below) and establishing anticholinergic exposure. The final year of the study period was used to  
12 allow all cohort members the opportunity for  $\geq 1$  year of follow-up post-index date; defined according to the  
13 date of the first identified OAB-related code during the study period. Outcomes could occur at any time  
14 between index date and censoring (e.g. at loss to follow-up, inpatient death, dis-enrolment in the insurance  
15 plan, or the end of the study period).  
16  
17

18  
19 For comparing to individuals without OAB, data from January 2008 to December 2009 were used to enrol  
20 patients in to either a non-OAB cohort or an OAB cohort ('OAB cohort 2'; representing a subset of the core  
21 OAB cohort). All patients were assigned an index date of January 1, 2010 to avoid immortal time bias in  
22 classifying subsequent outcomes to exposure groups.<sup>33</sup> Data from January 2010 to December 2015 were used  
23 to observe the outcomes of interest.  
24  
25

## 26 27 28 **Patient involvement**

29 Patients and the public were not involved in this research.  
30  
31

## 32 33 34 **Study sample**

35  
36 Study inclusion required that individuals be  $\geq 18$  years of age at index date with medical and pharmaceutical  
37 coverage in the twelve months prior to index date. Exclusion criteria were neurogenic bladder/neurogenic  
38 detrusor overactivity, pregnancy, malignant neoplasm, renal impairment, hepatic insufficiency, trauma or  
39 organ transplantation during the study period (Supplementary Table 1). Study eligibility was determined  
40  
41  
42  
43  
44  
45  
46  
47  
48  
49  
50  
51  
52  
53  
54  
55  
56  
57  
58  
59  
60

1  
2  
3 based on the availability of insurance coverage rather than actual resource use; and no exclusion criteria related  
4  
5 to the duration of post-index follow-up was imposed.  
6

7  
8 The OAB cohort included individuals with a) validated ICD-9 codes in any position on  $\geq 1$  inpatient claims, or  
9  
10  $\geq 2$  outpatient medical claims on separate dates, or b)  $\geq 2$  OAB-specific medication claims (by National Drug  
11  
12 Codes [NDCs]), during the identification period (Supplementary Table 1). The date of the first relevant code  
13  
14 during the identification period was the individual's index date. Cohort members were classified as incident if,  
15  
16 in the year prior to index, they had no OAB-specific claims. All other OAB cases were classified as prevalent.  
17  
18 For comparison to the non-OAB cohort, individuals in OAB cohort 2 were required to have one year of data  
19  
20 availability pre-index and potential for data availability through at least 2010. The non-OAB cohort was  
21  
22 randomly selected according to a 2:1 age and sex match to OAB cohort 2. Members of both cohorts were  
23  
24 assigned an index date of January 1<sup>st</sup> 2010 (i.e. the end of the identification period).  
25

26  
27 In terms of sample size, another recent MarketScan study identified over 1 million individuals with OAB over  
28  
29 five years.<sup>34</sup> Fractures, which occur more infrequently than falls, were observed among 5% of a separate OAB  
30  
31 cohort over five years;<sup>15</sup> which would correspond to 50,000 individuals from a cohort of 1 million. While little  
32  
33 is known about anticholinergic burden and falls in OAB, in an Irish study in Parkinson's disease, 24% of those  
34  
35 with high anticholinergic burden had injurious falls vs. 7% of those without anticholinergic burden.<sup>35</sup> To detect  
36  
37 a difference as great in OAB, at  $\alpha=0.05$  and  $\text{power}=0.8$ , 300 individuals per anticholinergic burden level  
38  
39 would be required. Ultimately, of the eligible cohort of over 2 million persons with OAB, a 15% sample was  
40  
41 randomly selected for computational feasibility.  
42

## 43 44 **Classifying exposure and outcomes**

45  
46  
47 The exposure of interest was cumulative anticholinergic burden estimated by applying the score derived from a  
48  
49 cross-sectional measure of anticholinergic exposure (the 2012 version of the Anticholinergic Cognitive Burden  
50  
51 (ACB) scale, a validated scale counting usage of 104 medications rated as contributing at least some  
52  
53  
54  
55  
56  
57  
58  
59  
60

1  
2  
3 anticholinergic burden)<sup>36 37</sup> over time, as outlined in Supplementary Figure 1.<sup>38</sup> Briefly, a unitless value  
4 reflecting the intensity of anticholinergic exposure (by a medication's defined daily dose),<sup>39 40</sup> strength of  
5 anticholinergic activity (by drug-specific ACB score), and period of exposure is estimated, reflecting an  
6 individual's cumulative standardized daily dose of all medications over time (Supplementary Figure 1).<sup>41</sup>  
7  
8  
9

10  
11 Cumulative anticholinergic burden was calculated at baseline (over the 12-month pre-index period) and  
12 updated at six-month intervals. At each time point, an individual's anticholinergic burden was classified as no  
13 vs. any anticholinergic burden; with burden characterized as low (1 to 89), medium (90 to 499) and high  
14 (500+), based on an initial review of histograms of score data. An example patient with low anticholinergic  
15 burden may have received two 90-day fills for 25 mg atenolol (ACB score=1) over a year (cumulative  
16 anticholinergic burden = 60.0); versus a patient with high anticholinergic burden having received one 30-day  
17 fill for 100 mg carbamazepine (ACB score = 1), two 30-day fills for solifenacin 10 mg (ACB score = 3) and  
18 two-90 day fills for tolterodine 4 mg (ACB score = 3) over a year (cumulative anticholinergic burden = 912.0;  
19 additional example calculations provided in Supplementary Figure 1).  
20  
21  
22  
23  
24  
25  
26  
27  
28

29  
30 The primary outcome was a composite of falls and fractures sufficiently severe to require inpatient or  
31 outpatient care, identified by validated ICD-9 and Healthcare Common Procedure Coding System  
32 (HCPCS)/Current Procedural Terminology (CPT) codes (Supplementary Table 1). While these outcomes were  
33 initially considered individually (i.e. as falls, vs. fractures), due to consistency in the trends in results between  
34 the composite and individual outcomes (*data not shown*), the manuscript results focus on the composite  
35 outcome.  
36  
37  
38  
39  
40  
41  
42

## 43 **Statistical analysis**

44  
45  
46 Baseline characteristics were summarized by means, standard deviations (SD), medians and interquartile  
47 ranges (IQR) for continuous variables; and by number and percent for categorical variables. These included  
48 demographics, risk factors for falls and fractures or high anticholinergic burden and other comorbidities.  
49  
50 Comorbidities were considered by overall Elixhauser score<sup>42</sup> and according to key comorbidities (see  
51  
52  
53  
54  
55  
56  
57  
58  
59  
60

1  
2  
3 Supplementary Table 1 for codes). Baseline characteristics were summarized overall and according to age  
4 (<65 vs. ≥65 years) and sex.  
5  
6

7 Cumulative anticholinergic burden was summarized by the number and percent with no burden vs. any burden  
8 at baseline and at 6-month intervals post-index, mean (95% confidence interval [CI]) scores at baseline and at  
9 6-month intervals post-index and as the five most frequent anticholinergic medications from the ACB scale  
10 prescribed at least once (at the level of the medication and class); overall and by age.  
11  
12  
13  
14

15  
16 The frequency of falls and fractures over the period was estimated according to baseline level of  
17 anticholinergic burden. The unadjusted rate (95%CI) per 100 person-years was estimated using negative  
18 binomial regression models; overall and by age, sex and timing (i.e., an incident vs. prevalent case) of OAB.  
19 Rates were compared according to baseline anticholinergic burden using rate ratios (RR) with 95%CIs.  
20  
21  
22  
23

24 Time to first fall or fracture, according to time-varying levels of cumulative anticholinergic burden (measured  
25 at the closest 6 month interval prior to the fall or fracture) and adjusted for age, sex and other key covariates,  
26 was estimated using the Andersen-Gill formulation of the Cox proportional hazards model;<sup>43</sup> and compared  
27 between cohorts at different levels of burden using hazard ratios (HRs) with 95%CIs. Potential covariates for  
28 adjustment were identified based on preliminary models and covariates remaining significant were retained in  
29 the final model (see list of potential covariates, identified by literature review, Supplementary Table 1). While  
30 the inclusion of anticholinergic burden as a continuous variable was considered, it was ultimately included as a  
31 categorical variable due to the ease of interpretation from comparing estimates for categorical levels directly.  
32  
33  
34  
35  
36  
37  
38  
39  
40  
41 To understand the impact of age, a subgroup analysis was performed among patients ≥65 years at index.  
42

43 Changes in medications or comorbidities over the period may be related to both anticholinergic use and the  
44 occurrence of falls and fractures. To control for these time-varying covariates<sup>44</sup> (as well as all other non-time-  
45 varying covariates included in the non-weighted Cox analysis), a marginal structural model with sequential  
46 propensity score calculation and adjustment was implemented within the Cox model.<sup>45</sup> For its implementation,  
47 a model estimating inverse-probability weights was first developed to predict anticholinergic burden  
48  
49  
50  
51  
52  
53  
54  
55  
56  
57  
58  
59  
60



1  
2  
3 (measured at the closest 6 month interval prior to the fall or fracture) based on age, sex, time-varying and non-  
4 time-varying covariates. Then, the Cox model incorporating the inverse-probability weights and levels of  
5 anticholinergic burden was implemented to estimate the HR (95%CI) of falls and fractures associated with  
6 levels of anticholinergic burden among those with OAB. Further details on the marginal structural model,  
7 including estimation of stabilized weights and robust variances, are described by Robins et al, 2000.<sup>46</sup>  
8  
9

10  
11 To compare falls and fractures among those with OAB to the non-OAB cohort, the increased risk according to  
12 level of baseline anticholinergic burden and OAB status was first estimated as unadjusted rates and RRs  
13 (95%CI) and then using adjusted Cox and marginal structural models, as above. OAB status was handled as a  
14 fixed covariate in the Cox model; and as either a fixed, or time-varying, covariate in the marginal structural  
15 model. To estimate the extent of the modification (by anticholinergic burden) of the association between OAB  
16 and falls and fractures, the products of the coefficients for the main effects of anticholinergic burden and  
17 coefficients for interactions between anticholinergic burden and OAB status were calculated.  
18  
19

20  
21 All analyses were conducted in R version 3.4.0.  
22  
23

## 24 **RESULTS**

### 25 **Core analyses**

26  
27 The mean age of the OAB cohort (n=154,432) was 56 years, 75.9% were <65 years, 67.9% were female (Table  
28 1) and the median duration of follow up post-index was 2.5 years. The mean (SD) Elixhauser comorbidity  
29 score was 1.0 (3.9) and 3.6% had a fall or fracture in the preceding year. At baseline (measured over the 12  
30 months pre-index), 35.4% had no, 25.0% had low, 20.5% had moderate and 19.1% had high anticholinergic  
31 burden. Those with any baseline anticholinergic burden were slightly older on average and more likely to be  
32 female. Median (IQR) baseline anticholinergic burden was 30 (0.0 to 314.0); and was substantially higher  
33 among those  $\geq 65$  (183 [3.0 to 713.0]), vs. those <65 (13 [0.0 to 200.0]) years.  
34  
35  
36  
37  
38  
39  
40  
41  
42  
43  
44  
45  
46  
47  
48  
49  
50  
51  
52  
53  
54  
55  
56  
57  
58  
59  
60

## Cumulative anticholinergic burden over time

Despite 35% having no anticholinergic burden at baseline, over 80% of those with OAB (n=124,819) had at least some anticholinergic burden recorded at any of the 6-month intervals over the period. The five most frequent anticholinergic medications prescribed from the ACB scale, two of which were antimuscarinics for OAB, were: codeine (n=27,639, 17.9%; ACB score=1), oxybutynin (n=27,554, 17.8%; ACB score=3), prednisone (n=27,131, 17.6%; ACB score=1), tolterodine (n=26,663; 17.3%; ACB score=3) and cyclobenzaprine (n=21,691; 14.0%; ACB score=2). The most frequent anticholinergic medication classes prescribed were: genitourinary smooth muscle relaxants (n=44,497; 28.8%; which included other antimuscarinics in addition to oxybutynin and tolterodine), antidepressants (n=22,638; 14.7%), beta-blockers (n=21,026; 13.6%), benzodiazepines (n=15,361; 9.9%) and adrenal medications (n=11,728; 7.6%). Mean (95%CI) levels of anticholinergic burden increased over the period and were higher among older vs. younger cohort members (Figure 1).

## Rates of falls and fractures

Among those with OAB, 15,287 (9.9%) experienced a fall (3.3%) or fracture (7.7%) over follow-up; including 3,650 (2.4%) with no baseline anticholinergic burden, 3,495 (2.3%) with low burden, 3,802 (2.5%) with moderate burden and 4,340 (2.8%) with high burden (measured over the 12 months pre-index). The unadjusted rate (95%CI) of falls or fractures was 5.0 (4.9 to 5.1) per 100 patient-years and ranged from 3.1 (3.0 to 3.2) for no baseline anticholinergic burden to 7.4 (7.1 to 7.6) for high burden (Figure 2). For those  $\geq 65$  years, rates were high overall and higher among those with higher baseline anticholinergic burden; from 8.2 (7.6 to 8.8) per 100 person-years for no burden to 11.1 (10.6 to 11.6) for high burden. For those  $<65$  years, rates were lower but also increased with increasing levels of baseline anticholinergic burden; from 2.3 (2.2 to 2.4) per 100 person-years for no burden to 4.8 (4.6 to 5.1) for high burden. When comparing rates between those  $<65$  vs.  $\geq 65$  years at the same level of baseline anticholinergic burden, RRs demonstrate a 2- to 3.5-fold increased risk of falls and fractures among older adults with OAB compared to younger adults with OAB.

1  
2  
3 A 1.9-fold (95%CI: 1.9 to 2.0) increased risk of falls and fractures was observed among those with some vs. no  
4 baseline anticholinergic burden; RRs ranged from 1.5 (1.4 to 1.6) for those with low vs. no anticholinergic  
5 burden to 2.4 (2.3 to 2.5) for those with high vs. no anticholinergic burden (Figure 2). The increased risk of  
6 falls and fractures associated with anticholinergic burden level was more pronounced among younger (<65  
7 years; RR 1.7 [1.6 to 1.8]) vs. older ( $\geq 65$  years; RR 1.4 [1.3 to 1.5]) adults with OAB.  
8  
9  
10  
11  
12

### 13 14 **Adjusted rates of falls and fractures**

15  
16  
17 A statistically significant association was observed between anticholinergic burden (measured at the closest 6  
18 month interval prior to the fall or fracture) and falls and fractures in the Cox model adjusted for age, sex and  
19 key comorbidities; and the magnitude of the association increased with increasing levels of anticholinergic  
20 burden. All key covariates included in the final model are described in Table 2. HRs (95%CI) for falls and  
21 fractures were 1.2 (1.2 to 1.3) for low vs. no anticholinergic burden; 1.3 (1.2 to 1.4) for medium vs. no burden;  
22 and 1.4 (1.3 to 1.4) for high vs. no burden. Findings from the marginal structural model were consistent  
23 although the magnitude of the association was slightly less; HRs (95%CI) were 1.1 (1.0 to 1.2) for low vs. no  
24 burden, 1.2 (1.1 to 1.2) for medium vs. no burden and 1.3 (1.2 to 1.4) for high vs. no burden. Among those  $\geq 65$   
25 years, anticholinergic burden was significantly associated with falls and fractures in the Cox model, but the  
26 association was less than for the overall OAB cohort: 1.1 (1.0 to 1.2) for low vs no burden; 1.2 (1.1 to 1.3) for  
27 medium vs. no burden; and 1.2 (1.1 to 1.3) for high vs. no burden (Table 2). See Supplementary Figure 2 for  
28 boxplots demonstrating the distribution of estimated weights by time and level of anticholinergic burden.  
29  
30  
31  
32  
33  
34  
35  
36  
37  
38  
39  
40  
41

### 42 **Comparison to the non-OAB cohort**

43  
44  
45 To understand the impact of OAB on the association between anticholinergic burden and falls and fractures,  
46 outcomes from 86,966 individuals without OAB and 43,483 individuals with OAB were analyzed. Both  
47 cohorts were 71.0% female and had a mean age of 57.4 years. Mean (SD) Elixhauser comorbidity score was  
48 slightly lower among the non-OAB cohort (0.7 [2.9]) vs. OAB cohort 2 (1.0 [3.6]), as was the percentage with  
49  
50  
51  
52  
53  
54  
55  
56  
57  
58  
59  
60

1  
2  
3 a fall or fracture in the previous year (2.5% for the non-OAB cohort vs. 3.3% for OAB cohort 2). Mean (SD)  
4 baseline anticholinergic burden (assessed over the 12 months pre-index) for OAB cohort 2 was substantially  
5 higher (347.6 [553.8]) than for the non-OAB cohort (89.2 [243.3]), which was reflected in the difference in  
6 distribution according to anticholinergic burden level at baseline. Among OAB cohort 2, 33.9% had no burden  
7 and 25.6% had high burden at baseline, compared to 59.2% with no burden and 4.7% with high burden at  
8 baseline among the non-OAB cohort.  
9  
10  
11  
12  
13  
14

15 The unadjusted rate (95%CI) of falls and fractures per 100 person-years was higher among those with OAB  
16 (4.8 [4.7 to 5.0]) vs. those without (3.5 [3.5 to 3.6]). Rates among OAB cohort 2 ranged from 3.1 (2.9 to 3.3)  
17 for those with no baseline burden to 6.9 (6.6 to 7.3) for high baseline burden; and among the non-OAB cohort,  
18 from 2.7 (2.6 to 2.8) for those with no burden to 8.1 (7.4 to 8.8) among the small sample with high burden.  
19  
20 Overall, those with OAB were at a 1.4-fold (1.3 to 1.5) increased risk of falls and fractures compared to those  
21 without OAB. RRs ranged from 1.2 (1.1 to 1.3) for those with no baseline burden, to 0.9 (0.8 to 0.9) among  
22 those at the highest level of burden (Table 3).  
23  
24  
25  
26  
27  
28  
29

30 Adjusted estimates from the Cox model confirmed the statistically significant association between OAB status  
31 and falls and fractures, which is modified by level of anticholinergic burden (measured at the closest 6 month  
32 interval prior to the fall or fracture; see Supplementary Table 2). Among those with OAB, the HR for low vs.  
33 no anticholinergic burden was 1.3, for medium vs. no anticholinergic burden was 1.3 and for high vs. no  
34 anticholinergic burden was 1.4. Among those without OAB, the HR for low vs. no anticholinergic burden was  
35 1.4, for medium vs. no burden it was 1.4 and for high vs. no burden it was 1.7; these values were estimated by  
36 multiplying the coefficients for anticholinergic burden level among those with OAB, by the coefficient for the  
37 interaction between anticholinergic burden level and OAB status. Results from the marginal structural model  
38 were similar (Supplemental Table 2), with boxplots demonstrating the distribution of estimated weights by  
39 time and level of anticholinergic burden in Supplemental Figure 3; and were largely unchanged dependent on  
40 whether OAB was handled as a fixed, or time-varying, covariate (data not shown).  
41  
42  
43  
44  
45  
46  
47  
48  
49  
50  
51  
52  
53  
54  
55  
56  
57  
58  
59  
60

## DISCUSSION

While anticholinergic exposure has been associated with higher rates of falls and fractures among those with other health conditions,<sup>3-7</sup> until now the impact of cumulative anticholinergic burden on the risk of falls and fractures among those with OAB has been unknown. This large cohort study demonstrated that among those with OAB, higher cumulative anticholinergic burden is associated with a significantly higher rate of falls and fractures. After adjustment for age, sex and key comorbidities, the increased risk of falls and fractures was 23% among those at low burden, 30% among those at medium burden and 38% among those at high burden, compared to those without anticholinergic burden. Rates of falls and fractures were approximately 40% higher among those with OAB than in a non-OAB comparison group. These data suggest that both urinary symptoms and anticholinergic burden are important risk factors for falls and fractures. The magnitude of the dose-response-like association and temporal relationship and the biologic plausibility of the association,<sup>47</sup> lend credence to possible causality<sup>33</sup> between increasing anticholinergic burden and falls and fractures in OAB.

The use of a validated generalizable dataset with a large sample size allowed for the calculation of precise estimates of risk and an understanding of the interplay of factors contributing to falls and fractures. While assessing cumulative exposure revealed a dose-response-like relationship with falls and fractures, validating that measure against cross-sectional assessments will be important. Varied statistical techniques were specified *a priori*, and results were consistent regardless of the approach selected. As expected, in the main analyses, estimates from the marginal structural models were of slightly lower magnitude, as these better control for time-varying covariates that may impact falls and fractures risk.<sup>48</sup> Finally, when comparing to the non-OAB cohort, falls and fractures were assigned according to an individual's OAB status prior to the follow-up period to avoid the potential for misclassification among those who developed OAB during that period.<sup>49</sup>

As with any retrospective study, the findings are limited by the data and duration of follow-up available. As the study used claims data, misclassification may have occurred if coding is driven by reimbursement-related factors. Given the sampling frame, findings may not be reflective of outcomes for individuals without or with

1  
2  
3 other types of insurance. As those with intermittent coverage may have been included, both exposure and  
4 outcomes may be underestimated. Additionally, anticholinergic use may be underestimated as over-the-counter  
5 medications, or those not included in the ACB scale, would not have been captured. Further, many other scales  
6 for measuring anticholinergic burden exist, and each considers different medications. While we chose the ACB  
7 scale because of its relevance to the US and the comprehensive list of medications considered,<sup>36 37</sup> the choice  
8 of anticholinergic burden scale could impact the results. Finally, it is conceivable that those with higher  
9 anticholinergic burden would have more encounters with the medical system within which to detect falls or  
10 fractures. We did not adjust for this, however, as the health conditions underlying the increased healthcare  
11 resource use would also be on the causal pathway between anticholinergic exposure and falls and fractures.  
12  
13

14  
15  
16  
17  
18  
19  
20  
21  
22 Few other robust data on the impact of cumulative anticholinergic exposure on falls and fractures among those  
23 with OAB exist. A recent US claims-based study found that antimuscarinic-treated OAB patients were at an  
24 almost 50% increased risk of falls and fractures compared to those without OAB, even without measuring  
25 overall anticholinergic burden, although those analyses did not account for other important risk factors.<sup>50</sup> A  
26 borderline significant association was reported between antimuscarinic use and fractures among Taiwanese  
27 patients with OAB, although assessment of anticholinergic burden was based on a single dispensation only.<sup>51</sup>  
28  
29  
30  
31  
32  
33  
34 That increased anticholinergic burden was associated with increased falls and fractures among those with OAB  
35 is consistent with findings from those with Parkinson's disease,<sup>5</sup> depression<sup>52</sup> and among post-menopausal  
36 women.<sup>4</sup> Exact estimates of increased risk are difficult to compare directly because most studies measured  
37 burden cross-sectionally not cumulatively. Nonetheless, the available evidence suggests a consistent message  
38 of increased falls and fractures risk with increased anticholinergic exposure and that the amount of increased  
39 risk depends on the extent of anticholinergic burden as well as the underlying disease. Future research may  
40 build off these findings by evaluating the impact of OAB-specific treatment on OAB symptoms that are risk  
41 factors for falls and fractures, while accurately accounting for background level of cumulative anticholinergic  
42 burden.  
43  
44  
45  
46  
47  
48  
49  
50  
51  
52  
53  
54  
55  
56  
57  
58  
59  
60

1  
2  
3 Older adults had a 3.3-fold increased risk of falls and fractures compared to younger adults with OAB and a 2-  
4 to 3.5-fold increased risk at each level of anticholinergic burden. While we were surprised that the increased  
5 risk of falls and fractures associated with anticholinergic burden was less marked among older adults with  
6 OAB – a finding consistent in both the unadjusted and adjusted analyses – there are a few plausible  
7 explanations. One is that the baseline risk of falls or fractures is much higher among older adults. This suggests  
8 that older adults with OAB likely have many predisposing factors other than anticholinergic burden compared  
9 to younger OAB patients for whom anticholinergic burden may be the main contributing risk factor.  
10  
11 Regardless of the mechanism, these findings highlight the importance of medication review for falls risk  
12 among younger and older patients with OAB.<sup>53 54</sup>

13  
14  
15 In an administrative database study of patients with OAB, higher levels of anticholinergic burden are  
16 associated with a higher rate of falls and fractures; with those at the highest level at an almost 40% increased  
17 risk of falls and fractures compared to those without anticholinergic burden. These data will help inform the  
18 appropriate use of anticholinergic medications among both younger and older OAB patients with multifaceted  
19 comorbidity requiring anticholinergic exposure.<sup>55</sup>

## Tables and figures

**Table 1 Demographic and clinical characteristics of the OAB cohort at baseline; Truven MarketScan databases 2007-2015**

|                                                     | Overall     |        | By age      |        |            |        | By baseline anticholinergic burden* |        |             |        | By sex     |        |             |        |
|-----------------------------------------------------|-------------|--------|-------------|--------|------------|--------|-------------------------------------|--------|-------------|--------|------------|--------|-------------|--------|
|                                                     |             |        | <65         |        | ≥65        |        | No burden                           |        | Some burden |        | Male       |        | Female      |        |
|                                                     | N = 154,432 |        | N = 117,271 |        | N = 37,161 |        | N = 54,602                          |        | N = 99,830  |        | N = 49,597 |        | N = 104,835 |        |
|                                                     | n           | %      | n           | %      | n          | %      | n                                   | %      | n           | %      | n          | %      | n           | %      |
| <b>Age (years)</b>                                  |             |        |             |        |            |        |                                     |        |             |        |            |        |             |        |
| Mean (SD)                                           | 55.7        | 15.2   | 49.4        | 11.0   | 75.7       | 7.5    | 51.4                                | 14.6   | 58.1        | 15.0   | 56.2       | 14.0   | 55.5        | 15.8   |
| Median (IQR)                                        | 56          | 46, 64 | 52          | 43, 58 | 75         | 69, 81 | 52                                  | 42, 60 | 58          | 49, 68 | 57         | 48, 64 | 55          | 46, 64 |
| ≤45                                                 | 36,039      | 23.3   | 36,039      | 30.7   | 0          | 0      | 17,300                              | 31.7   | 18,739      | 18.8   | 9,915      | 20     | 26,124      | 24.9   |
| 46-55                                               | 39,784      | 25.8   | 39,784      | 33.9   | 0          | 0      | 15,357                              | 28.1   | 24,427      | 24.5   | 12,743     | 25.7   | 27,041      | 25.8   |
| 56-65                                               | 43,414      | 28.1   | 41,448      | 35.3   | 1,966      | 5.3    | 14,610                              | 26.8   | 28,804      | 28.9   | 16,160     | 32.6   | 27,254      | 26     |
| 66-75                                               | 17,649      | 11.4   | 0           | 0      | 17,649     | 47.5   | 4,383                               | 8      | 13,266      | 13.3   | 6,115      | 12.3   | 11,534      | 11     |
| 76-85                                               | 13,099      | 8.5    | 0           | 0      | 13,099     | 35.2   | 2,341                               | 4.3    | 10,758      | 10.8   | 3,765      | 7.6    | 9,334       | 8.9    |
| 86+                                                 | 4,447       | 2.9    | 0           | 0      | 4,447      | 12     | 611                                 | 1.1    | 3,836       | 3.8    | 899        | 1.8    | 3,548       | 3.4    |
| <b>Female sex</b>                                   | 104,835     | 67.9   | 79,159      | 67.5   | 25,676     | 69.1   | 29,999                              | 54.9   | 74,836      | 75.0   | 0          | 0      | 104,835     | 100.0  |
| <b>Comorbidities**</b>                              |             |        |             |        |            |        |                                     |        |             |        |            |        |             |        |
| Hypertension, uncomplicated                         | 55,900      | 36.2   | 35,332      | 30.1   | 20,568     | 55.3   | 14,401                              | 26.4   | 41,499      | 41.6   | 19,895     | 40.1   | 36,005      | 34.3   |
| Diabetes mellitus & diabetic peripheral neuropathy  | 21,490      | 13.9   | 13,424      | 11.4   | 8,066      | 21.7   | 5,540                               | 10.1   | 15,950      | 16.0   | 8,205      | 16.5   | 13,285      | 12.7   |
| Cerebrovascular disease and stroke                  | 8,517       | 5.5    | 3,180       | 2.7    | 5,337      | 14.4   | 1,599                               | 2.9    | 6,918       | 6.9    | 2,905      | 5.9    | 5,612       | 5.4    |
| Dizziness                                           | 8,398       | 5.4    | 5,366       | 4.6    | 3,032      | 8.2    | 1,905                               | 3.5    | 6,493       | 6.5    | 2,249      | 4.5    | 6,149       | 5.9    |
| Osteoporosis                                        | 6,609       | 4.3    | 3,162       | 2.7    | 3,447      | 9.3    | 1,626                               | 3.0    | 4,983       | 5.0    | 471        | 0.9    | 6,138       | 5.9    |
| Arthritis                                           | 6,345       | 4.1    | 4,370       | 3.7    | 1,975      | 5.3    | 1,295                               | 2.4    | 5,050       | 5.1    | 1,097      | 2.2    | 5,248       | 5.0    |
| Falls or fractures within the preceding year        | 5,542       | 3.6    | 3,059       | 2.6    | 2,483      | 6.7    | 1,163                               | 2.1    | 4,379       | 4.4    | 1,210      | 2.4    | 4,332       | 4.1    |
| <b>Lifestyle factors</b>                            |             |        |             |        |            |        |                                     |        |             |        |            |        |             |        |
| Smoking                                             | 13,548      | 8.8    | 8,836       | 7.5    | 4,712      | 12.7   | 2,956                               | 5.4    | 10,592      | 10.6   | 4,426      | 8.9    | 9,122       | 8.7    |
| Alcohol abuse                                       | 768         | 0.5    | 658         | 0.6    | 110        | 0.3    | 188                                 | 0.3    | 580         | 0.6    | 374        | 0.8    | 394         | 0.4    |
| <b>Medications</b>                                  |             |        |             |        |            |        |                                     |        |             |        |            |        |             |        |
| Opioids                                             | 56,036      | 36.3   | 41,608      | 35.5   | 14,428     | 38.8   | 11,044                              | 20.2   | 44,992      | 45.1   | 14,887     | 30.0   | 41,149      | 39.3   |
| Benzodiazepine use                                  | 27,507      | 17.8   | 20,252      | 17.3   | 7,255      | 19.5   | 2,349                               | 4.3    | 25,158      | 25.2   | 5,882      | 11.9   | 21,625      | 20.6   |
| Chronic use of inhaled or oral corticosteroids      | 5,367       | 3.5    | 3,306       | 2.8    | 2,061      | 5.5    | 888                                 | 1.6    | 4,479       | 4.5    | 1,492      | 3.0    | 3,875       | 3.7    |
| <b>Risk factors for high anticholinergic burden</b> |             |        |             |        |            |        |                                     |        |             |        |            |        |             |        |



|                                                  | Overall     |            | By age      |            |            |            | By baseline anticholinergic burden* |            |             |             | By sex     |            |             |            |
|--------------------------------------------------|-------------|------------|-------------|------------|------------|------------|-------------------------------------|------------|-------------|-------------|------------|------------|-------------|------------|
|                                                  |             |            | <65         |            | ≥65        |            | No burden                           |            | Some burden |             | Male       |            | Female      |            |
|                                                  | N = 154,432 |            | N = 117,271 |            | N = 37,161 |            | N = 54,602                          |            | N = 99,830  |             | N = 49,597 |            | N = 104,835 |            |
|                                                  | n           | %          | n           | %          | n          | %          | n                                   | %          | n           | %           | n          | %          | n           | %          |
| Depression, neurotic disorders, or psychosis     | 32,674      | 21.2       | 27,037      | 23.1       | 5,637      | 15.2       | 7,838                               | 14.4       | 24,836      | 24.9        | 8,135      | 16.4       | 24,539      | 23.4       |
| COPD                                             | 10,016      | 6.5        | 5,604       | 4.8        | 4,412      | 11.9       | 1,824                               | 3.3        | 8,192       | 8.2         | 3,167      | 6.4        | 6,849       | 6.5        |
| Parkinson's disease/other neurologic impairments | 5,973       | 3.9        | 3,401       | 2.9        | 2,572      | 6.9        | 1,059                               | 1.9        | 4,914       | 4.9         | 1,847      | 3.7        | 4,126       | 3.9        |
| Dementia                                         | 1,570       | 1.0        | 138         | 0.1        | 1,432      | 3.9        | 216                                 | 0.4        | 1,354       | 1.4         | 408        | 0.8        | 1,162       | 1.1        |
| Intestinal motility disorders                    | 152         | 0.1        | 107         | 0.1        | 45         | 0.1        | 43                                  | 0.1        | 109         | 0.1         | 39         | 0.1        | 113         | 0.1        |
| <b>Elixhauser score, mean (SD)</b>               | <b>1</b>    | <b>3.9</b> | <b>1</b>    | <b>3.3</b> | <b>3</b>   | <b>5.0</b> | <b>1</b>                            | <b>3.0</b> | <b>1</b>    | <b>4.3</b>  | <b>1</b>   | <b>3.9</b> | <b>1</b>    | <b>3.9</b> |
| <b>Timing of OAB</b>                             |             |            |             |            |            |            |                                     |            |             |             |            |            |             |            |
| Incident case                                    | 106,730     | 69.1       | 84,888      | 72.4       | 21,842     | 58.8       | 43,688                              | 80.0       | 63,042      | 63.1        | 36,783     | 74.2       | 69,947      | 66.7       |
| Prevalent case                                   | 47,702      | 30.9       | 32,383      | 27.6       | 15,319     | 41.2       | 10,914                              | 20.0       | 36,788      | 36.9        | 12,814     | 25.8       | 34,888      | 33.3       |
| <b>Anticholinergic burden</b>                    |             |            |             |            |            |            |                                     |            |             |             |            |            |             |            |
| Mean (SD)                                        | 266.7       | 486.5      | 213.8       | 443.9      | 433.8      | 570.3      | 0                                   | 0          | 412.6       | 553.2       | 154.2      | 365.3      | 320.0       | 526.1      |
| Median (IQR)                                     | 30          | 0.0, 314.0 | 13          | 0.0, 200.0 | 183        | 3.0, 713.0 | 0                                   | 0.0, 0.0   | 180         | 36.0, 609.0 | 1          | 0.0, 120.0 | 60.0        | 0.0, 445.5 |
| No burden                                        | 54,602      | 35.4       | 46,746      | 39.9       | 7,856      | 21.1       | 54,602                              | 100.0      | 0           | 0           | 24,603     | 49.6       | 29,999      | 28.6       |
| Low                                              | 38,669      | 25.0       | 31,229      | 26.6       | 7,440      | 20.0       | 0                                   | 0          | 38,669      | 38.7        | 11,504     | 23.2       | 27,165      | 25.9       |
| Medium                                           | 31,719      | 20.5       | 22,006      | 18.8       | 9,713      | 26.1       | 0                                   | 0          | 31,719      | 31.8        | 8,460      | 17.1       | 23,259      | 22.2       |
| High                                             | 29,442      | 19.1       | 17,290      | 14.7       | 12,152     | 32.7       | 0                                   | 0          | 29,442      | 29.5        | 5,030      | 10.1       | 24,412      | 23.3       |

COPD: chronic obstructive pulmonary disease; IQR: interquartile range; OAB: overactive bladder; SD: standard deviation

\*Baseline anticholinergic burden assessed over the 12 month pre-index period

\*\*Only comorbidities identified among >2.5% are presented. The following were identified among <2.5% of the cohort; syncope, complicated hypertension, cognitive impairment, Alzheimer's disease, musculoskeletal problems, hyperparathyroidism, decreased vision, chronic kidney disease, leg and foot amputation, hypotension, palmonental reflex.

**Table 2 Adjusted (left) Cox model- and (right) marginal structural model-estimated hazard ratios (95% CI) for the association between falls and fractures and anticholinergic burden among the OAB cohort (N=154,432), including the subgroup aged  $\geq 65$  years (middle); Truven MarketScan databases 2007-2015**

|                                                                    | Cox model*         |         |                                 |         | Marginal structural model* |         |
|--------------------------------------------------------------------|--------------------|---------|---------------------------------|---------|----------------------------|---------|
|                                                                    | Overall population |         | Subgroup aged $\geq 65$ years** |         | Overall population         |         |
|                                                                    | HR (95%CI)         | p-value | HR (95%CI)                      | p-value | HR (95%CI)                 | p-value |
| <b>By anticholinergic burden level vs. no burden**</b>             |                    |         |                                 |         |                            |         |
| Low (1 – 89)                                                       | 1.2 (1.2, 1.3)     | <0.001  | 1.1 (1.0, 1.2)                  | 0.006   | 1.1 (1.0, 1.2)             | 0.018   |
| Medium (90 – 499)                                                  | 1.3 (1.2, 1.4)     | <0.001  | 1.2 (1.1, 1.3)                  | <0.001  | 1.2 (1.1, 1.2)             | <0.001  |
| High (500+)                                                        | 1.4 (1.3, 1.4)     | <0.001  | 1.2 (1.1, 1.3)                  | <0.001  | 1.3 (1.2, 1.4)             | <0.001  |
| <b>By age category vs. <math>\leq 45</math></b>                    |                    |         |                                 |         |                            |         |
| 46 to 55                                                           | 1.3 (1.2, 1.3)     | <0.001  | 1.7 (1.6, 1.7)***               | <0.001  |                            |         |
| 56 to 65                                                           | 1.5 (1.4, 1.6)     | <0.001  |                                 |         |                            |         |
| 66 to 75                                                           | 2.3 (2.2, 2.4)     | <0.001  |                                 |         |                            |         |
| 76 to 85                                                           | 3.4 (3.2, 3.6)     | <0.001  |                                 |         |                            |         |
| 86+                                                                | 5.0 (4.6, 5.4)     | <0.001  |                                 |         |                            |         |
| <b>Sex</b>                                                         |                    |         |                                 |         |                            |         |
| Female vs. male                                                    | 1.5 (1.5, 1.6)     | <0.001  | 1.6 (1.5, 1.7)                  | <0.001  |                            |         |
| <b>Comorbidity categories at baseline</b>                          |                    |         |                                 |         |                            |         |
| Cardiovascular diseases†                                           | 1.1 (1.1, 1.1)     | 0.018   | 1.2 (1.1, 1.2)                  | <0.001  |                            |         |
| Neurologic impairments                                             | 1.5 (1.4, 1.6)     | <0.001  | 1.7 (1.5, 1.8)                  | <0.001  |                            |         |
| Endocrine, nutritional and metabolic disease                       | 1.1 (1.1, 1.2)     | <0.001  | 1.2 (1.1, 1.4)                  | <0.001  |                            |         |
| Cardiovascular disease X Neurologic impairments                    | 1.1 (1.0, 1.2)     | 0.042   | 1.0 (0.9, 1.1)                  | 0.945   |                            |         |
| Cardiovascular disease X Endocrine, nutritional, metabolic disease | 1.0 (1.0, 1.1)     | 0.750   | 0.9 (0.8, 1.0)                  | 0.118   |                            |         |
| Neurologic impairments X Endocrine, nutritional, metabolic disease | 1.1 (1.0, 1.2)     | 0.092   | 1.0 (0.9, 1.1)                  | 0.786   |                            |         |

CI: confidence interval; HR: hazard ratio; OAB: overactive bladder.

\*The Cox models were implemented using function `coxph` from the R package `survival` version 2.41-3. The marginal structural model was implemented using function `coxph` from R package `survival` version 2.41-3, using the `weight` argument to apply time-varying weights, and setting a cluster term for enrolment id for robust variance estimation. Time-varying weights were calculated using function `ipwtm` from R package `ipw` version 1.0-11, and based on a multinomial model with categorical anticholinergic burden as the outcome, where all greyed-out variables were included as predictor variables.

\*\*Level of anticholinergic burden assessed using the closest 6 month measure prior to the fall or fracture

\*\*\*For the subgroup analysis among those aged  $\geq 65$  years, age categories for comparison were 65 to <74 years, vs.  $\geq 75$  vs <75 years

†Cardiovascular disease = cerebrovascular disease + stroke.

For peer review only

1  
2  
3  
4  
5  
6  
7  
8  
9  
10  
11  
12  
13  
14  
15  
16  
17  
18  
19  
20  
21  
22  
23  
24  
25  
26  
27  
28  
29  
30  
31  
32  
33  
34  
35  
36  
37  
38  
39  
40  
41  
42  
43  
44  
45  
46  
47

**Table 3** Rates and rate ratios for falls and fractures estimated over the study period among OAB cohort 2 and non-OAB cohort, according to baseline anticholinergic burden; Truven MarketScan databases 2007-2015

|                                                             | OAB cohort 2<br>N = 43,483 | Non-OAB cohort<br>N = 86,966 | OAB vs. non-OAB rate ratios<br>N = 130,449 |
|-------------------------------------------------------------|----------------------------|------------------------------|--------------------------------------------|
| <b>Fall and fracture rates (95%CI) per 100 person-years</b> |                            |                              |                                            |
| Overall, crude rate                                         | 4.8 (4.7, 5.0)             | 3.5 (3.5, 3.6)               | 1.4 (1.3, 1.5)                             |
| By baseline anticholinergic burden level*                   |                            |                              |                                            |
| No burden (0)                                               | 3.1 (2.9, 3.3)             | 2.7 (2.6, 2.8)               | 1.2 (1.1, 1.3)                             |
| Low (1-89)                                                  | 4.3 (4.0, 4.6)             | 3.8 (3.6, 4.0)               | 1.1 (1.0, 1.2)                             |
| Medium (90-499)                                             | 5.5 (5.2, 5.8)             | 5.1 (4.9, 5.4)               | 1.1 (1.0, 1.2)                             |
| High (500+)                                                 | 6.9 (6.6, 7.3)             | 8.1 (7.4, 8.8)               | 0.9 (0.8, 0.9)                             |
| <b>Rate ratios, by anticholinergic burden level</b>         |                            |                              |                                            |
| Any vs. no burden                                           | 1.8 (1.7, 1.9)             | 1.8 (1.7, 1.9)               |                                            |
| Low vs. no burden                                           | 1.4 (1.3, 1.5)             | 1.4 (1.3, 1.5)               |                                            |
| Medium vs. no burden                                        | 1.7 (1.6, 1.9)             | 1.9 (1.8, 2.0)               |                                            |
| High vs. no burden                                          | 2.2 (2.0, 2.4)             | 3.0 (2.7, 3.3)               |                                            |

CI: confidence interval; OAB: overactive bladder

\*Baseline anticholinergic burden assessed over the 12 month pre-index period

## REQUIRED STATEMENTS

**Contributorship statement:** SM Szabo and K Gooch were responsible for the conception and design of the work. SM Szabo, G Lozano-Ortega, B Rogula and A Deighton were responsible for data collection. S M Szabo, G Lozano-Ortega, B Rogula , K Gooch C Schermer, D Walker, E Vonesh, N Campbell, and A Deighton were responsible for data analysis and interpretation. SM Szabo was responsible for drafting the article. S M Szabo, K Gooch, C Schermer, D Walker, G Lozano-Ortega, B Rogula, A Deighton, E Vonesh, N Campbell were responsible for critical revision of the article. S M Szabo, K Gooch, C Schermer, D Walker, G Lozano-Ortega, B Rogula, A Deighton, E Vonesh, and N Campbell were responsible for final approval of the version to be published.

**Copyright:** The Corresponding Author has the right to grant on behalf of all authors and does grant on behalf of all authors, a worldwide licence to the Publishers and its licensees in perpetuity, in all forms, formats and media (whether known now or created in the future), to i) publish, reproduce, distribute, display and store the Contribution, ii) translate the Contribution into other languages, create adaptations, reprints, include within collections and create summaries, extracts and/or, abstracts of the Contribution, iii) create any other derivative work(s) based on the Contribution, iv) to exploit all subsidiary rights in the Contribution, v) the inclusion of electronic links from the Contribution to third party material where-ever it may be located; and, vi) licence any third party to do any or all of the above.

**Competing interest statement:** All authors have completed the ICMJE form for Disclosure of Potential Conflicts of Interest (available on request from the corresponding author). Shelagh Szabo, Greta Lozano-Ortega, Alison Deighton and Basia Rogula declare a relevant conflict of interest for the work under consideration for publication as Broadstreet received funding from Astellas for the design and analysis of the data for this study; they declare no conflicts relative to financial activities outside of the submitted work, intellectual property or other relationships not covered. Katherine Gooch, Carol Schermer and David Walker declare a relevant conflict of interest to the work under consideration for publication and for relevant financial activities outside of the submitted work as they are or were employees of Astellas Pharma, the funder of the study, at the time of study completion; they declare no conflicts relative to intellectual property or other relationships not covered. Edward Vonesh declares a relevant conflict of interest for the work under consideration for publication and for relevant financial activities outside of the submitted work as he received personal fees for consultancy for Astellas Pharma, the study funder; he declares no conflicts relative to intellectual property or other relationships not covered. Noll Campbell declares a relevant conflict of interest for relevant financial activities outside of the submitted work as he received personal fees for consultancy for Astellas Pharma, the study funder; he declares no conflicts relative to the work under consideration for publication, intellectual property or other relationships not covered.

**Transparency:** Shelagh M Szabo affirms that this manuscript is an honest, accurate, and transparent account of the study being reported; that no important aspects of the study have been omitted; and that any discrepancies from the study as planned (and, if relevant, registered) have been explained.

1  
2  
3  
4  
5 **Ethics:** Because the Truven MarketScan data are de-identified and are fully HIPAA compliant, and  
6 because this study did not involve the collection, use, or transmittal of individually identifiable data,  
7 Institutional Review Board review or approval was not required.  
8  
9

10 **Disclosures:**

11 Katherine Gooch, Carol Schermer and David Walker = Are/were employees, Astellas Pharma Global  
12 Development, Inc. at the time of study completion  
13

14 Shelagh Szabo, Greta Lozano-Ortega, Basia Rogula, and Alison Deighton = Employees of Broadstreet  
15 HEOR, which received payment from Astellas to conduct the study  
16

17 Edward Vonesh and Noll Campbell = Received payment from Astellas for consultation  
18  
19  
20

21 **Funding and role of study sponsor:** The present study was initiated by Astellas Pharma Global  
22 Development, Inc., and funding for the conduct of this study was provided by Astellas Pharma Global  
23 Development, Inc. Publication of the study results was not contingent on permission from the sponsor.  
24

25 **Data sharing:** The authors confirm that all data required to replicate our findings is available for  
26 purchase by any researcher from Truven MarketScan via this link  
27 <https://marketscan.truvenhealth.com/marketscanportal/>  
28

29 **Acknowledgement:** We would like to thank Elizabeth Badillo for drafting, reviewing and editing this  
30 manuscript. Elizabeth Badillo is an employee of Broadstreet HEOR, which received payment from  
31 Astellas.  
32

33 The corresponding author attests that all listed authors meet authorship criteria and that no others meeting  
34 the criteria have been omitted.  
35  
36  
37  
38  
39  
40  
41  
42  
43  
44  
45  
46  
47  
48  
49  
50  
51  
52  
53  
54  
55  
56  
57  
58  
59  
60

## REFERENCES

1. Tinetti ME, Speechley M, Ginter SF. Risk factors for falls among elderly persons living in the community. *N Engl J Med* 1988;319(26):1701-7. doi: 10.1056/nejm198812293192604 [published Online First: 1988/12/29]
2. Nevitt MC, Cummings SR, Hudes ES. Risk factors for injurious falls: a prospective study. *J Gerontol* 1991;46(5):M164-70.
3. Zia A, Kamaruzzaman S, Myint PK, et al. Anticholinergic burden is associated with recurrent and injurious falls in older individuals. *Maturitas* 2016;84:32-37.
4. Marcum ZA, Wirtz HS, Pettinger M, et al. Anticholinergic medication use and falls in postmenopausal women: findings from the women's health initiative cohort study. *BMC Geriatr* 2016;16:76. doi: 10.1186/s12877-016-0251-0
5. Crispo JA, Willis AW, Thibault DP, et al. Associations between Anticholinergic Burden and Adverse Health Outcomes in Parkinson Disease. *PloS one* 2016;11(3):e0150621.
6. Aizenberg D, Sigler M, Weizman A, et al. Anticholinergic burden and the risk of falls among elderly psychiatric inpatients: a 4-year case-control study. *International psychogeriatrics* 2002;14(3):307-10. [published Online First: 2002/12/12]
7. Marcum ZA, Perera S, Thorpe JM, et al. Anticholinergic Use and Recurrent Falls in Community-Dwelling Older Adults: Findings From the Health ABC Study. *Ann Pharmacother* 2015;49(11):1214-21. doi: 10.1177/1060028015596998
8. Pariente A, Dartigues JF, Benichou J, et al. Benzodiazepines and injurious falls in community dwelling elders. *Drugs Aging* 2008;25(1):61-70.
9. O'Loughlin JL, Robitaille Y, Boivin JF, et al. Incidence of and risk factors for falls and injurious falls among the community-dwelling elderly. *Am J Epidemiol* 1993;137(3):342-54.
10. Muir SW, Gopaul K, Montero Odasso MM. The role of cognitive impairment in fall risk among older adults: a systematic review and meta-analysis. *Age Ageing* 2012;41(3):299-308. doi: 10.1093/ageing/afs012
11. Takazawa K, Arisawa K. Relationship between the type of urinary incontinence and falls among frail elderly women in Japan. *J Med Invest* 2005;52(3-4):165-71.

12. Nakagawa H, Niu K, Hozawa A, et al. Impact of nocturia on bone fracture and mortality in older individuals: a Japanese longitudinal cohort study. *J Urol* 2010;184(4):1413-8. doi: 10.1016/j.juro.2010.05.093 [published Online First: 2010/08/24]
13. Vaughan CP, Brown CJ, Goode PS, et al. The association of nocturia with incident falls in an elderly community-dwelling cohort. *Int J Clin Pract* 2010;64(5):577-83. doi: 10.1111/j.1742-1241.2009.02326.x
14. Dionyssiotis Y. Analyzing the problem of falls among older people. *International Journal of General Medicine* 2012;5:805-13. doi: 10.2147/IJGM.S32651
15. Wagner TH, Hu TW, Bentkover J, et al. Health-related consequences of overactive bladder. *Am J Manag Care* 2002;8(19 Suppl):S598-607.
16. Coyne KS, Wein A, Nicholson S, et al. Comorbidities and personal burden of urgency urinary incontinence: a systematic review. *Int J Clin Pract* 2013;67(10):1015-33. doi: 10.1111/ijcp.12164
17. Jayadevappa R, Chhatre S, Newman DK, et al. Association between overactive bladder treatment and falls among older adults. *Neurourol Urodyn* 2018;37(8):2688-94. doi: 10.1002/nau.23719
18. Dumoulin C, Hay-Smith J. Pelvic floor muscle training versus no treatment for urinary incontinence in women. A Cochrane systematic review. *Eur J Phys Rehabil Med* 2008;44(1):47-63.
19. Gormley EA, Lightner DJ, Faraday M, et al. Diagnosis and treatment of overactive bladder (non-neurogenic) in adults: AUA/SUFU guideline amendment. *The Journal of urology* 2015;193(5):1572-80.
20. Gomes T, Juurlink DN, Ho JMW, et al. Risk of serious falls associated with oxybutynin and tolterodine: A population based study. *Journal of Urology* 2011;186(4):1340-44. doi: <http://dx.doi.org/10.1016/j.juro.2011.05.077>
21. Szabo SM, Gooch KL, Walker DR, et al. The Association Between Overactive Bladder and Falls and Fractures: A Systematic Review. *Adv Ther* 2018;35(11):1831-41. doi: 10.1007/s12325-018-0796-8



- 1  
2  
3  
4 22. The risk of falls and fractures among those with overactive bladder (OAB): A systematic  
5 review. ISPOR European Meeting 2016; Vienna, Austria.  
6
- 7 23. Zinner NR, Mattiasson A, Stanton SL. Efficacy, safety, and tolerability of extended-release  
8 once-daily tolterodine treatment for overactive bladder in older versus younger patients.  
9 *J Am Geriatr Soc* 2002;50(5):799-807.  
10
- 11 24. Dubeau CE, Kraus SR, Griebing TL, et al. Effect of fesoterodine in vulnerable elderly  
12 subjects with urgency incontinence: a double-blind, placebo controlled trial. *J Urol*  
13 2014;191(2):395-404. doi: 10.1016/j.juro.2013.08.027  
14
- 15 25. Batista JE, Kolbl H, Herschorn S, et al. The efficacy and safety of mirabegron compared  
16 with solifenacin in overactive bladder patients dissatisfied with previous antimuscarinic  
17 treatment due to lack of efficacy: results of a noninferiority, randomized, phase IIIb trial.  
18 *Ther Adv Urol* 2015;7(4):167-79. doi: 10.1177/1756287215589250  
19
- 20 26. Onukwugha E, Zuckerman IH, McNally D, et al. The total economic burden of overactive  
21 bladder in the United States: a disease-specific approach. *Am J Manag Care* 2009;15(4  
22 Suppl):S90-7.  
23
- 24 27. Hausdorff JM. Gait variability: methods, modeling and meaning. *J Neuroeng Rehabil*  
25 2005;2:19. doi: 10.1186/1743-0003-2-19  
26
- 27 28. Darkow T, Fontes CL, Williamson TE. Costs associated with the management of overactive  
28 bladder and related comorbidities. *Pharmacotherapy* 2005;25(4):511-9.  
29
- 30 29. IBM Watson Health. MarketScan Databases 2018 [Available from:  
31 <http://truvenhealth.com/markets/life-sciences/products/data-tools/marketscan-databases>.  
32
- 33 30. Wu JM, Matthews CA, Conover MM, et al. Lifetime Risk of Stress Incontinence or Pelvic  
34 Organ Prolapse Surgery. *Obstetrics and gynecology* 2014;123(6):1201-06. doi:  
35 10.1097/AOG.0000000000000286  
36
- 37 31. Marsico M, Mehta V, Chastek B, et al. Estimating the incidence and prevalence of juvenile-  
38 onset recurrent respiratory papillomatosis in publicly and privately insured claims  
39 databases in the United States. *Sexually transmitted diseases* 2014;41(5):300-05.  
40
- 41  
42  
43  
44  
45  
46  
47  
48  
49  
50  
51  
52  
53  
54  
55  
56  
57  
58  
59  
60

- 1  
2  
3  
4 32. Gauthier G, Guérin A, Zhdanova M, et al. Treatment patterns, healthcare resource  
5 utilization, and costs following first-line antidepressant treatment in major depressive  
6 disorder: a retrospective US claims database analysis. *BMC Psychiatry* 2017;17:222.  
7 doi: 10.1186/s12888-017-1385-0  
8  
9
- 10 33. Rothman KJ, Greenland S, Lash TL. Modern epidemiology. 3rd ed. Philadelphia: Wolters  
11 Kluwer Health/Lippincott Williams & Wilkins 2008.  
12  
13
- 14 34. Durden E, Walker D, Gray S, et al. The Direct and Indirect Costs Associated With  
15 Overactive Bladder Within a Commercially-Insured Population in the United States. *J*  
16 *Occup Environ Med* 2018 doi: 10.1097/JOM.0000000000001367  
17  
18
- 19 35. Richardson K, Bennett K, Maidment ID, et al. Use of Medications with Anticholinergic  
20 Activity and Self-Reported Injurious Falls in Older Community-Dwelling Adults. *J Am*  
21 *Geriatr Soc* 2015;63(8):1561-9. doi: 10.1111/jgs.13543  
22  
23
- 24 36. Boustani M, Campbell N, Munger S, et al. Impact of anticholinergics on the aging brain: a  
25 review and practical application. 2008  
26  
27
- 28 37. Salahudeen MS, Duffull SB, Nishtala PS. Anticholinergic burden quantified by  
29 anticholinergic risk scales and adverse outcomes in older people: a systematic review.  
30 *BMC Geriatr* 2015;15:31. doi: 10.1186/s12877-015-0029-9  
31  
32
- 33 38. Assessment of anticholinergic burden scales and measures for estimating anticholinergic  
34 exposure in retrospective US database analyses. ISPOR 22nd Annual International  
35 Meeting; 2018; Baltimore, MD.  
36  
37
- 38 39. WHO Collaborating Centre for Drug Statistics Methodology. ATC/DDD Index 2017  
39 [Available from: [http://www.whocc.no/atc\\_ddd\\_index/](http://www.whocc.no/atc_ddd_index/).  
40  
41
- 42 40. WHO Collaborating Centre for Drug Statistics Methodology. Definition and general  
43 considerations [Available from:  
44 [https://www.whocc.no/ddd/definition\\_and\\_general\\_considera/](https://www.whocc.no/ddd/definition_and_general_considera/).  
45  
46
- 47 41. Gray SL, Anderson ML, Dublin S, et al. Cumulative use of strong anticholinergics and  
48 incident dementia: A prospective cohort study. *JAMA Internal Medicine* 2015;175(3):401-  
49 07. doi: 10.1001/jamainternmed.2014.7663  
50  
51  
52  
53  
54  
55  
56  
57  
58  
59  
60

- 1  
2  
3  
4 42. Elixhauser A, Steiner C, Harris DR, et al. Comorbidity measures for use with administrative  
5 data. *Medical care* 1998;36(1):8-27.  
6
- 7 43. Vonesh E. Generalized Linear and Nonlinear Models for Correlated Data: Theory and  
8 Applications Using SAS. Cary, NC: SAS Institute Inc. 2012.  
9
- 10 44. Lusivika-Nzinga C, Selinger-Leneman H, Grabar S, et al. Performance of the marginal  
11 structural cox model for estimating individual and joined effects of treatments given in  
12 combination. *BMC Med Res Methodol* 2017;17(1):160. doi: 10.1186/s12874-017-0434-1  
13  
14  
15
- 16 45. Hernan MA, Brumback B, Robins JM. Marginal structural models to estimate the causal  
17 effect of zidovudine on the survival of HIV-positive men. *Epidemiology* 2000;11(5):561-  
18 70.  
19  
20
- 21 46. Robins JM, Hernan MA, Brumback B. Marginal structural models and causal inference in  
22 epidemiology. *Epidemiology* 2000;11(5):550-60.  
23  
24
- 25 47. Collamati A, Martone AM, Poscia A, et al. Anticholinergic drugs and negative outcomes in  
26 the older population: from biological plausibility to clinical evidence. *Aging clinical and*  
27 *experimental research* 2016;28(1):25-35. doi: 10.1007/s40520-015-0359-7 [published  
28 Online First: 2015/05/02]  
29  
30  
31
- 32 48. Imai K, Ratkovic M. Robust Estimation of Inverse Probability Weights for Marginal Structural  
33 Models. *Journal of the American Statistical Association* 2015;110(511):1013-23. doi:  
34 10.1080/01621459.2014.956872  
35  
36
- 37 49. Rothman KG. *Modern Epidemiology* 2012.  
38
- 39 50. Yehoshua A, Chancellor M, Vasavada S, et al. Health Resource Utilization and Cost for  
40 Patients with Incontinent Overactive Bladder Treated with Anticholinergics. *J Manag*  
41 *Care Spec Pharm* 2016;22(4):406-13. doi: 10.18553/jmcp.2016.22.4.406  
42  
43  
44
- 45 51. Kao LT, Huang CY, Lin HC, et al. No Increased Risk of Fracture in Patients Receiving  
46 Antimuscarinics for Overactive Bladder Syndrome: A Retrospective Cohort Study. *J Clin*  
47 *Pharmacol* 2018 doi: 10.1002/jcph.1067  
48  
49
- 50 52. Chatterjee S, Bali V, Carnahan RM, et al. Anticholinergic medication use and risk of fracture  
51 in elderly adults with depression. *JAGS* 2016;64:1492-7.  
52  
53  
54  
55  
56  
57  
58  
59  
60

- 1  
2  
3  
4 53. MacDiarmid SA. Maximizing the Treatment of Overactive Bladder in the Elderly. *Reviews in*  
5 *Urology* 2008;10(1):6-13.  
6  
7 54. Talasz H, Lechleitner M. Polypharmacy and incontinence. *Zeitschrift für Gerontologie und*  
8 *Geriatric* 2012;45(6):464-67.  
9  
10 55. Maman K, Aballea S, Nazir J, et al. Comparative efficacy and safety of medical treatments  
11 for the management of overactive bladder: a systematic literature review and mixed  
12 treatment comparison. *Eur Urol* 2014;65(4):755-65. doi: 10.1016/j.eururo.2013.11.010  
13  
14  
15  
16  
17  
18  
19  
20  
21  
22  
23  
24  
25  
26  
27  
28  
29  
30  
31  
32  
33  
34  
35  
36  
37  
38  
39  
40  
41  
42  
43  
44  
45  
46  
47  
48  
49  
50  
51  
52  
53  
54  
55  
56  
57  
58  
59  
60

For peer review only

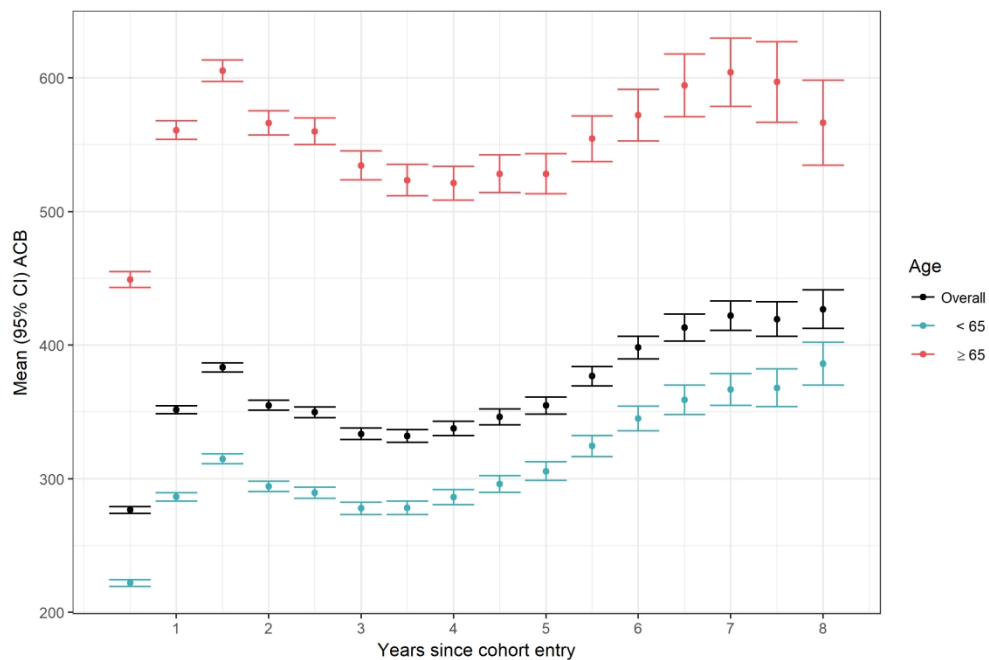

Figure 1: Mean (95% CI) level of anticholinergic burden post-index, according to time since cohort entry, and age

Footnote: CI: confidence interval; ACB: anticholinergic burden

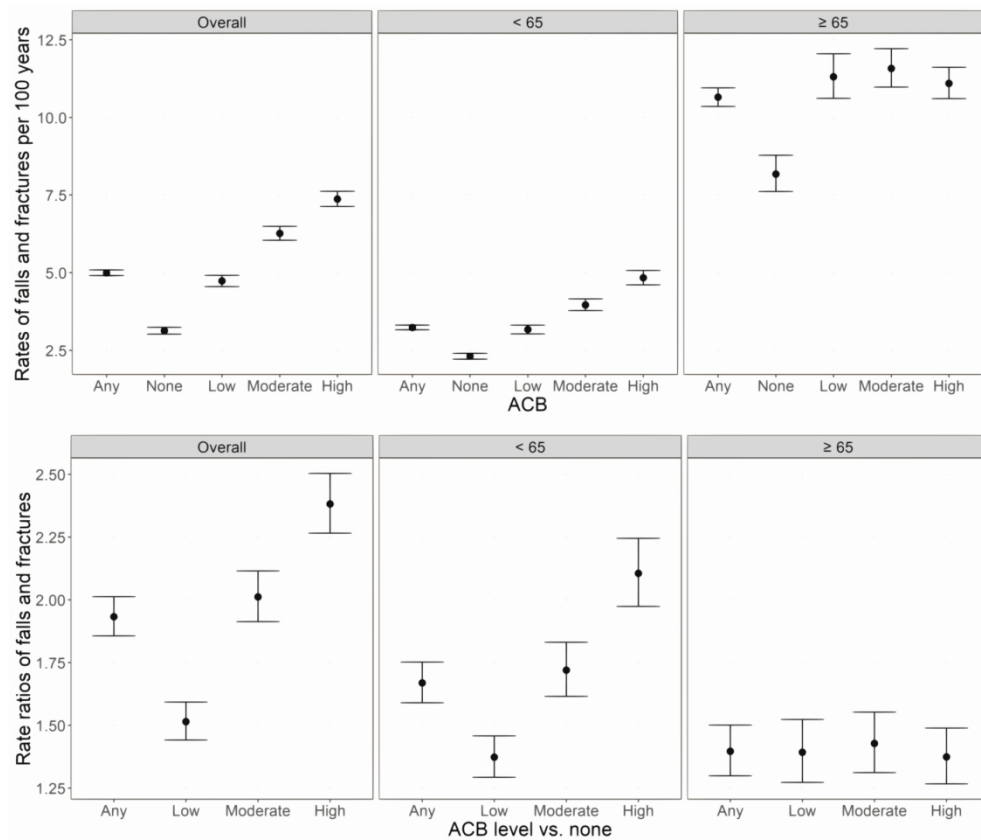

Figure 2: Rates (top), and rate ratios (bottom), for falls and fractures\* estimated over the study period among the OAB cohort, according to baseline anticholinergic burden,\*\* overall and according to age (<65 years vs. >65 years); Truven MarketScan databases 2007-2015

Footnote: ACB: anticholinergic burden

\*Point estimates (dots) and 95% confidence intervals (lines) plotted

\*\*Baseline anticholinergic burden assessed over the 12 month pre-index period

169x143mm (300 x 300 DPI)

## Supplementary tables and figures

## Supplementary Figure 1: Example trajectory and calculation of cumulative anticholinergic burden over time

Steps to estimate cumulative anticholinergic exposure are:

- 1) determine the defined daily dose (DDD) of all medications considered by the ACB scale;
- 2) calculate the standardized daily dose (SDD) of the medication for each anticholinergic dispensing, as follows:
 
$$\text{SDD} = [\text{Number of daily doses} \times \text{Unit dose}] / \text{DDD};$$
- 3) multiply the SDD by the ACB scale score of the medication dispensed to yield a drug and patient-specific measure of standardized daily anticholinergic exposure (SDACE);
- 4) add drug-specific SDACE at the patient level to account for coverage with multiple medications on a given day, to give a summated standardized daily anticholinergic exposure (SumSDACE);
- 5) calculate cumulative burden by summing SumSDACE for all days during the exposure period.

**Drug 1:**

ACB score 2, prescribed at 1.5 x defined daily dose  
→ Adjusted score = 2 x 1.5 = 3

**Drug 2:**

ACB score 1, prescribed at defined daily dose  
→ Adjusted score = 1 x 1 = 1

## Example trajectory and calculation:

|                              | Day 1: initiate drug 1 |   |   |    | Day 5: initiate drug 2, continue drug 1 |           |           |           | Day 9: Discontinue drugs |
|------------------------------|------------------------|---|---|----|-----------------------------------------|-----------|-----------|-----------|--------------------------|
| Day                          | 1                      | 2 | 3 | 4  | 5                                       | 6         | 7         | 8         | 9                        |
| Drug 1 (Adjusted score = 3)  | X                      | X | X | X  | X                                       | X         | X         | X         |                          |
| Drug 2 (Adjusted score = 1)  |                        |   |   |    | X                                       | X         | X         | X         |                          |
| SumSDACE                     | 3                      | 3 | 3 | 3  | 3 + 1 = 4                               | 3 + 1 = 4 | 3 + 1 = 4 | 3 + 1 = 4 | 0                        |
| CumSDACE (Summed daily dose) | 3                      | 6 | 9 | 12 | 16                                      | 20        | 24        | 28        | 28                       |

DDD=defined daily dose, ACB=anticholinergic burden, SDD=standardized daily dose, SDACE=standardized daily anticholinergic exposure, SumSDACE=summated standardized daily anticholinergic exposure

## Supplementary Table 1: CPT, NDC, ICD-9 and HCPCS codes to identify OAB, comorbidities and risk factors, and study outcomes

| Definition                                                                                                                                                                                                                                                                                                                                                                                                                                                                                                                                                                                                                                                                                                                                                                                                                                                                                                                                                                                                                                                                                                                                                                                                                                                                                                                                                                            | References                                                                                                                                                                                                                                                                                                                                                                                                                                                                                                                                                                                                                                                                                                                     |
|---------------------------------------------------------------------------------------------------------------------------------------------------------------------------------------------------------------------------------------------------------------------------------------------------------------------------------------------------------------------------------------------------------------------------------------------------------------------------------------------------------------------------------------------------------------------------------------------------------------------------------------------------------------------------------------------------------------------------------------------------------------------------------------------------------------------------------------------------------------------------------------------------------------------------------------------------------------------------------------------------------------------------------------------------------------------------------------------------------------------------------------------------------------------------------------------------------------------------------------------------------------------------------------------------------------------------------------------------------------------------------------|--------------------------------------------------------------------------------------------------------------------------------------------------------------------------------------------------------------------------------------------------------------------------------------------------------------------------------------------------------------------------------------------------------------------------------------------------------------------------------------------------------------------------------------------------------------------------------------------------------------------------------------------------------------------------------------------------------------------------------|
| <b>Identify OAB</b>                                                                                                                                                                                                                                                                                                                                                                                                                                                                                                                                                                                                                                                                                                                                                                                                                                                                                                                                                                                                                                                                                                                                                                                                                                                                                                                                                                   |                                                                                                                                                                                                                                                                                                                                                                                                                                                                                                                                                                                                                                                                                                                                |
| <b>By diagnosis code</b>                                                                                                                                                                                                                                                                                                                                                                                                                                                                                                                                                                                                                                                                                                                                                                                                                                                                                                                                                                                                                                                                                                                                                                                                                                                                                                                                                              |                                                                                                                                                                                                                                                                                                                                                                                                                                                                                                                                                                                                                                                                                                                                |
| Other functional disorders of bladder (ICD9: 596.5),<br>Hypertonicity of the bladder (ICD9: 596.51)<br>Urinary incontinence unspecified (ICD9: 788.3)<br>Urge incontinence (ICD9: 788.31)<br>Mixed incontinence (ICD9: 788.33)<br>Urinary frequency (ICD9: 788.41)<br>Nocturia (ICD9: 788.43)<br>Urgency of urination (ICD9: 788.63)<br>Functional urinary incontinence (ICD9: 788.91)                                                                                                                                                                                                                                                                                                                                                                                                                                                                                                                                                                                                                                                                                                                                                                                                                                                                                                                                                                                                | Chancellor MB, Migliaccio-Walle K, Bramley TJ, et al. Long-term patterns of use and treatment failure with anticholinergic agents for overactive bladder. Clin Ther. 2013;35(11):1744-1751.<br>Pelletier EM, Vats V, Clemens JQ. Pharmacotherapy adherence and costs versus nonpharmacologic management in overactive bladder. Am J Manag Care. 2009;15(4 Suppl):S108-114.<br>Scheife R, Takeda M. Central nervous system safety of anticholinergic drugs for the treatment of overactive bladder in the elderly. Clinical Therapeutics. 2005;27(2):144-153.<br>Yeaw J, Benner JS, Walt JG, Sian S, Smith DB. Comparing adherence and persistence across 6 chronic medication classes. J Manag Care Pharm. 2009;15(9):728-740. |
| <b>By drug code</b>                                                                                                                                                                                                                                                                                                                                                                                                                                                                                                                                                                                                                                                                                                                                                                                                                                                                                                                                                                                                                                                                                                                                                                                                                                                                                                                                                                   |                                                                                                                                                                                                                                                                                                                                                                                                                                                                                                                                                                                                                                                                                                                                |
| Darifenacin (NDC: 0430-0170, 0430-0171, 0591-4375, 0591-4380, 10370-170, 10370-171, 13668-202, 13668-203, 35356-272, 42291-206, 42291-207, 54868-5363, 54868-5704, 59746-516, 59746-517, 65862-861, 65862-862, 69097-431, 69097-432)                                                                                                                                                                                                                                                                                                                                                                                                                                                                                                                                                                                                                                                                                                                                                                                                                                                                                                                                                                                                                                                                                                                                                  | FDA-US Food and Drug administration. National Drug Code Directory. <a href="https://www.fda.gov/Drugs/InformationOnDrugs/ucm142438.htm">https://www.fda.gov/Drugs/InformationOnDrugs/ucm142438.htm</a>                                                                                                                                                                                                                                                                                                                                                                                                                                                                                                                         |
| Fesoterodine (NDC: 0069-0242, 0069-0244, 54868-6156, 54868-6175, 55154-2737, 55154-2738, 63539-183, 63539-242, 69189-0242, 69189-0244)                                                                                                                                                                                                                                                                                                                                                                                                                                                                                                                                                                                                                                                                                                                                                                                                                                                                                                                                                                                                                                                                                                                                                                                                                                                |                                                                                                                                                                                                                                                                                                                                                                                                                                                                                                                                                                                                                                                                                                                                |
| Flavoxate (NDC: 0574-0115, 24658-720, 42806-058, 50268-324, 51224-154, 54868-6326, 60429-290, 68151-3826)                                                                                                                                                                                                                                                                                                                                                                                                                                                                                                                                                                                                                                                                                                                                                                                                                                                                                                                                                                                                                                                                                                                                                                                                                                                                             |                                                                                                                                                                                                                                                                                                                                                                                                                                                                                                                                                                                                                                                                                                                                |
| Oxybutynin (NDC: 0023-5812, 0023-5861, 0093-5206, 0093-5207, 0093-5208, 0121-0671, 0179-0187, 0378-6015, 0378-6605, 0378-6610, 0378-6615, 0603-1491, 0603-4975, 0615-3512, 0615-7519, 0615-7520, 0615-7521, 0832-0038, 0904-2821, 0904-6570, 10135-609, 10135-610, 10135-611, 10147-0761, 10147-0771, 10147-0781, 10544-518, 10544-559, 11523-4311, 11523-4322, 16729-317, 16729-318, 16729-319, 17856-1491, 21695-406, 33261-342, 35356-909, 35356-958, 35356-991, 42291-633, 42291-634, 42291-635, 43063-145, 43353-367, 43353-769, 43353-978, 50090-0317, 50090-0318, 50090-2049, 50111-456, 50268-627, 50268-628, 50268-629, 50436-4777, 50458-805, 50458-810, 50458-815, 51079-722, 51079-723, 52544-041, 52544-084, 52544-166, 52544-920, 53808-0618, 53808-0747, 53808-0873, 54569-1990, 54838-510, 54868-2157, 54868-4502, 54868-4835, 54868-5728, 54868-5742, 54868-5743, 54868-6171, 55154-0657, 55154-5537, 55154-6298, 55154-6647, 55154-7225, 60432-092, 60760-980, 61786-605, 62175-270, 62175-271, 62175-272, 63187-749, 63629-1354, 63629-5484, 63629-6355, 63629-6434, 63739-548, 64980-209, 64980-210, 64980-211, 65162-371, 65162-372, 65162-373, 66336-604, 67296-1175, 68071-1875, 68071-2013, 68084-400, 68084-480, 68084-610, 68151-3646, 68788-6402, 69189-0581, 69189-5206, 69189-6605, 69189-6610, 70518-0158, 70518-0202, 76237-216, 76237-217, 76237-218) |                                                                                                                                                                                                                                                                                                                                                                                                                                                                                                                                                                                                                                                                                                                                |
| Solifenacin (NDC: 50090-0972, 51248-150, 51248-151, 54569-5790, 54868-4705, 54868-5398, 55154-3875, 55154-3876, 55154-3877, 55154-3878)                                                                                                                                                                                                                                                                                                                                                                                                                                                                                                                                                                                                                                                                                                                                                                                                                                                                                                                                                                                                                                                                                                                                                                                                                                               |                                                                                                                                                                                                                                                                                                                                                                                                                                                                                                                                                                                                                                                                                                                                |
| Tolterodine (NDC: 0009-4541, 0009-4544, 0009-5190, 0009-5191, 0093-0010, 0093-0018, 0093-2049, 0093-2050, 0093-2055, 0093-2056, 0093-7163, 0093-7164, 0378-3402, 0378-3404, 0378-5445, 0378-5446, 0904-6592, 0904-6593, 13668-189, 13668-190, 16590-959, 33342-097, 33342-098, 35356-417, 51079-197, 51079-198, 51079-235, 54868-4514, 54868-5126, 55154-3933, 55154-3935, 55289-132, 59762-0047, 59762-0048, 59762-0170, 59762-0800, 60429-825, 60429-826, 60505-3527, 60505-3528, 63629-5625, 68151-2049, 68151-4281, 69189-3404, 69189-5190)                                                                                                                                                                                                                                                                                                                                                                                                                                                                                                                                                                                                                                                                                                                                                                                                                                       |                                                                                                                                                                                                                                                                                                                                                                                                                                                                                                                                                                                                                                                                                                                                |
| Trospium (NDC: 0574-0118, 0574-0145, 0591-3636, 23155-530, 42291-846, 60429-098, 60429-103, 60505-3454, 68001-228, 68462-461, 69097-912)                                                                                                                                                                                                                                                                                                                                                                                                                                                                                                                                                                                                                                                                                                                                                                                                                                                                                                                                                                                                                                                                                                                                                                                                                                              |                                                                                                                                                                                                                                                                                                                                                                                                                                                                                                                                                                                                                                                                                                                                |
| Mirabegron/Myrbetriq (NDC: 00469-2601, 00469-2602)                                                                                                                                                                                                                                                                                                                                                                                                                                                                                                                                                                                                                                                                                                                                                                                                                                                                                                                                                                                                                                                                                                                                                                                                                                                                                                                                    |                                                                                                                                                                                                                                                                                                                                                                                                                                                                                                                                                                                                                                                                                                                                |
| OnabotulinumtoxinA/Botox (CPT: 52287)                                                                                                                                                                                                                                                                                                                                                                                                                                                                                                                                                                                                                                                                                                                                                                                                                                                                                                                                                                                                                                                                                                                                                                                                                                                                                                                                                 |                                                                                                                                                                                                                                                                                                                                                                                                                                                                                                                                                                                                                                                                                                                                |
| <b>Outcomes</b>                                                                                                                                                                                                                                                                                                                                                                                                                                                                                                                                                                                                                                                                                                                                                                                                                                                                                                                                                                                                                                                                                                                                                                                                                                                                                                                                                                       |                                                                                                                                                                                                                                                                                                                                                                                                                                                                                                                                                                                                                                                                                                                                |
| Fall (ICD9: E880-E886, E888, E998.0, E888.1, E888.8, E888.9)<br>Fracture (ICD9: 733.1,* 733.93-733.98,* 800.x-829.x, E887; ICD9: 79.0-79.6; CPT: 21800, 21805, 21810, 21820, 21825, 22305, 22310, 22318, 22319, 22520, 22521, 22523, 22524, 23500, 23505, 23515, 23570, 23575, 23585, 23600, 23605, 23615, 23616, 23620, 23625, 23630, 23665, 23670, 23675, 23680, 24500, 24505, 24515, 24516, 24530, 24535, 24538, 24545, 24546, 24560, 24565,                                                                                                                                                                                                                                                                                                                                                                                                                                                                                                                                                                                                                                                                                                                                                                                                                                                                                                                                       | Afroz PN, Bykowski MR, James IB, et al. The Epidemiology of Mandibular Fractures in the United States, Part 1: A Review of 13,142 Cases from the US National Trauma Data Bank. Journal of oral and maxillofacial surgery. 2015;73(12):2361.<br>Beydoun HA, Beydoun MA, Mishra NK, et al. Comorbid Parkinson's disease, falls and fractures in the 2010 National Emergency Department Sample. Parkinsonism & Related Disorders. 2017;35:30-35.                                                                                                                                                                                                                                                                                  |



24566, 24575, 24576, 24577, 24579, 24582, 24620, 24635, 24650, 24655, 24665, 24666, 24670, 24675, 24685, 25500, 25505, 25515, 25520, 25525, 25526, 25530, 25535, 25545, 25560, 25565, 25574, 25575, 25600, 25605, 25606, 25607, 25608, 25609, 25622, 25624, 25628, 25630, 25635, 25645, 25650, 25651, 25652, 25680, 25685, 26600, 26605, 26607, 26608, 26615, 27193, 27194, 27200, 27202, 27215, 27216, 27217, 27218, 27220, 27222, 27226, 27227, 27228, 27230, 27232, 27235, 27236, 27238, 27240, 27244, 27245, 27246, 27248, 27254, 27267, 27268, 27269, 27500, 27501, 27502, 27503, 27506, 27507, 27508, 27509, 27510, 27511, 27513, 27514, 27520, 27524, 27530, 27532, 27535, 27536, 27538, 27540, 27750, 27752, 27756, 27758, 27759, 27760, 27762, 27766, 27767, 27768, 27769, 27780, 27781, 27784, 27786, 27788, 27792, 27808, 27810, 27814, 27816, 27818, 27822, 27823, 27824, 27825, 27826, 27827, 27828, 28400, 28405, 28406, 28415, 28420, 28430, 28435, 28436, 28445, 28450, 28455, 28456, 28465, 28470, 28475, 28476, 28485, 29850, 29851, 29855, 29856; HCPCS: S2360)

Clavijo-Alvarez JA, Deleyiannis FWB, Peitzman AB, Zenati MS. Risk factors for death in elderly patients with facial fractures secondary to falls. *The Journal of craniofacial surgery*. 2012;23(2):494-498.

Crispo JA, Willis AV, Thibault DP, et al. Associations between Anticholinergic Burden and Adverse Health Outcomes in Parkinson Disease. *PLoS one*. 2016;11(3):e0150621.

Curtis JR, Mudano AS, Solomon DH, et al. Identification and validation of vertebral compression fractures using administrative claims data. *Medical care*. 2009;47(1):69.

Darkow T, Fontes CL, Williamson TE. Costs associated with the management of overactive bladder and related comorbidities. *Pharmacotherapy*. 2005;25(4):511-519.

Ganz DA, Kim SB, Zingmond DS, et al. Effect of a Falls Quality Improvement Program on Serious Fall-Related Injuries. *Journal of the American Geriatrics Society*. 2015;63(1):63-70.

Kachroo S, Kawabata H, Colilla S, et al. Association between hypoglycemia and fall-related events in type 2 diabetes mellitus: analysis of a US commercial database. *Journal of managed care & specialty pharmacy*. 2015;21(3):243-253.

Kalilani L, Asgharnejad M, Palokangas T, Durgin T. Comparing the Incidence of Falls/Fractures in Parkinson's Disease Patients in the US Population. *PLoS one*. 2016;11(9):e0161689.

Kamal-Bahl SJ, Stuart BC, Beers MH. Propoxyphene use and risk for hip fractures in older adults. *The American journal of geriatric pharmacotherapy*. 2006;4(3):219-226.

Kruschinski C, Sheehy O, Hummers-Pradier E, Leloir J. Fracture risk of patients suffering from dizziness: A retrospective cohort study. *European Journal of General Practice*. 2010;16(4):229-235.

Lapane KL, Jesdale BM, Dubé CE, et al. Sulfonylureas and risk of falls and fractures among nursing home residents with type 2 diabetes mellitus. *Diabetes research and clinical practice*. 2015;109(2):411.

Miller M, Stürmer T, Azrael D, et al. Opioid analgesics and the risk of fractures in older adults with arthritis. *Journal of the American Geriatrics Society*. 2011;59(3):430-438.

Pan H-H, Li C-Y, Chen T-J, Su T-P, Wang K-Y. Association of polypharmacy with fall-related fractures in older Taiwanese people: age-and gender-specific analyses. *BMJ open*. 2014;4(3):e004428.

Roudsari BS, Ebel BE, Corso PS, et al. The acute medical care costs of fall-related injuries among the US older adults. *Injury*. 2005;36(11):1316-1322.

Schiff. Pregnancy outcomes following hospitalisation for a fall in Washington State from 1987 to 2004. *BJOG: An International Journal of Obstetrics & Gynaecology*. 2008;115(13):1648-1654.

Shah M, Chaudhari S, McLaughlin TP, et al. Cumulative burden of oral corticosteroid adverse effects and the economic implications of corticosteroid use in patients with systemic lupus erythematosus. *Clinical therapeutics*. 2013;35(4):486.

Stevens JA, Powell KE, Smith SM, et al. Physical activity, functional limitations, and the risk of fall-related fractures in community-dwelling elderly. *Annals of epidemiology*. 1997;7(1):54-61.

Verma SK, Sorock GS, Pransky GS, Courtney TK, Smith GS. Occupational physical demands and same-level falls resulting in fracture in female workers: an analysis of workers' compensation claims. *Injury prevention*. 2007;13(1):32-36.

Wolinsky FD, Bentler SE, Liu L, et al. Recent hospitalization and the risk of hip fracture among older Americans. *The Journals of Gerontology Series A: Biological Sciences and Medical Sciences*. 2009;64(2):249-255.

## Comorbidities and falls/fractures risk factors

### CV diseases

Hypertension, uncomplicated (ICD9: 401.x)

Cerebrovascular disease and Stroke (ICD9: 430.x-438.x)

Hypertension, complicated (ICD9: 402.x-405)

Hypotension (ICD9: 796.3)

### Musculoskeletal problems

Arthritis (ICD9: 446.x, 701.0, 710.0-710.4, 710.8, 710.9, 711.2, 714.x, 719.3, 720.x, 725.x, 728.5, 728.89, 729.30)

Musculoskeletal problems (ICD9: 306.0, 723.9, 729.89)

Bynum JP, Rabins PV, Weller W, et al. The relationship between a dementia diagnosis, chronic illness, Medicare expenditures, and hospital use. *Journal of the American Geriatrics Society*. 2004;52(2):187-194.

Centers for Medicare & Medicaid Services. ICD-9-CM Diagnosis and Procedure Codes: Abbreviated and Full Code Titles. <https://www.cms.gov/medicare/coding/ICD9providerdiagnosticcodes/codes.html>. Accessed November 07 2016.

Forbes WF, McLachlan DR. Further thoughts on the aluminum-Alzheimer's disease link. *Journal of Epidemiology and Community Health*. 1996;50(4):401-403.

Goldstein LB. Accuracy of ICD-9-CM coding for the identification of patients with acute ischemic stroke: effect of modifier codes. *Stroke; a journal of cerebral circulation*. 1998;29(8):1602-1604.

Osteoporosis (ICD9: 733.0x)

### Neurologic impairments

Palmomental reflex (ICD9: 796.1)

Parkinson's disease and other neurologic impairments (ICD9: 332.x, 331.9, 333.4, 333.5, 333.92, 334.x-335.x, 336.2, 340.x, 341.x, 345.x, 348.1, 348.3, 780.3, 784.3)

Dementia (ICD9: 290.x, 294.1, 331.2)

Depression, neurotic disorders, or psychosis (ICD9: 293.8, 295-299, 300-309, 311, E937.x)

Alzheimer's disease (ICD9: 331.0)

Cognitive impairment (ICD9: 331.x)

Dizziness (ICD9: 780.4)

Syncope/fainting (ICD9: 780.2)

### Endocrine, nutritional and metabolic diseases

Diabetes mellitus and diabetic peripheral neuropathy (ICD9: 250.x, 357.2)

Hyperparathyroidism (ICD9: 252.0x, 588.81)

### Other

COPD (ICD9: 490.x, 491.x, 492.x, 494.x, 496.x)

Chronic kidney disease (ICD9: 403.x, 585.x)

Internal motility disorders (ICD9: 564.89)

Decreased vision (ICD9: 369.x)

Prior (serious) falls or fractures within the preceding year **Various:** (see outcomes listed above)

Leg and foot amputation (ICD9: 896.x, 897.x)

### Lifestyle choices

Smoking (by proxy codes, and COPD (see below) (ICD9: 649.0x, 305.1x, V15.82)

Alcohol abuse (ICD9: 265.2, 291.1-291.3, 291.5-291.9, 303.0, 303.9, 305.0, 357.5, 425.5, 535.3, 571.0-571.3, 980.x, V11.3)

### Medications

Opioids (**NDC:** codes for Opioids [full list available upon request])

Benzodiazepines (**NDC:** codes for Benzodiazepines [full list available upon request])

**CPT:** 1034F, 4000F, 4001F, 99406, 99407

**HCPCS:** D1320, G8402, G8403, G8453, G8454, G8455)

Chronic use of inhaled or oral corticosteroids (**NDC:** codes for inhaled or oral corticosteroids [full list available upon request]) (Chronic was defined a days supply of  $\geq 90$  over one year)

Hammill BG, Curtis LH, Schulman KA, Whellan DJ. Relationship between cardiac rehabilitation and long-term risks of death and myocardial infarction among elderly Medicare beneficiaries. *Circulation*. 2010;121(1):63-70

Johnston S, Conner C, Aagren M, Ruiz K, Bouchard J. Association between hypoglycaemic events and fall-related fractures in Medicare-covered patients with type 2 diabetes. *Diabetes, Obesity and Metabolism*. 2012;14(7):634-643.

Muir SW, Gopaul K, Montero Odasso MM. The role of cognitive impairment in fall risk among older adults: a systematic review and meta-analysis. *Age Ageing*. 2012;41(3):299-308.

Mustard CA, Mayer T. Case-Control Study of Exposure to Medication and the Risk of Injurious Falls Requiring Hospitalization among Nursing Home Residents. *American Journal of Epidemiology*. 1997;145(8):738-745

Nakagawa H, Niu K, Hozawa A, et al. Impact of nocturia on bone fracture and mortality in older individuals: a Japanese longitudinal cohort study. *J Urol*. 2010;184(4):1413-1418\*

Nevitt MC, Cummings SR, Hudes ES. Risk factors for injurious falls: a prospective study. *J Gerontol*. 1991;46(5):M164-170

Pan H-H, Li C-Y, Chen T-J, Su T-P, Wang K-Y. Association of polypharmacy with fall-related fractures in older Taiwanese people: age-and gender-specific analyses. *BMJ open*. 2014;4(3):e004428.

Quan H, Sundararajan V, Halfon P, et al. Coding algorithms for defining comorbidities in ICD-9-CM and ICD-10 administrative data. *Medical care*. 2005;1130-1139.

Teng Z, Zhu Y, Wu F, et al. Opioids Contribute to Fracture Risk: A Meta-Analysis of 8 Cohort Studies: e0128232. *PLoS One*. 2015;10(6)

Tinetti ME, Speechley M, Ginter SF. Risk factors for falls among elderly persons living in the community. *New England journal of medicine*. 1988;319(26):1701-1707

Vaughan CP, Brown CJ, Goode PS, et al. The association of nocturia with incident falls in an elderly community-dwelling cohort. *Int J Clin Pract*. 2010;64(5):577-583.

NDC: National drug code; ICD-9: International Classification of Diseases (9th Edition); CPT: Common Procedural Code; HCPCS: Healthcare Common Procedure Coding System

\*Pathophysiologic fractures, stress fractures, and fracture due to motor vehicle accident were excluded in the base case analysis.

**Supplementary Table 2: Results from the (left) Cox model and (right) marginal structural model estimating the association between falls and fractures and anticholinergic burden, adjusted for important confounders and OAB status (N = 130,449)**

|                                                                    | Cox model results* |         | MSM results*   |         |
|--------------------------------------------------------------------|--------------------|---------|----------------|---------|
|                                                                    | HR (95%CI)         | p-value | HR (95%CI)     | p-value |
| <b>By anticholinergic burden level vs. no burden**</b>             |                    |         |                |         |
| Low (1 – 89)                                                       | 1.3 (1.2, 1.4)     | <0.001  | 1.2 (1.1, 1.3) | <0.001  |
| Medium (90 – 499)                                                  | 1.3 (1.2, 1.4)     | <0.001  | 1.3 (1.2, 1.5) | <0.001  |
| High (500+)                                                        | 1.4 (1.3, 1.5)     | <0.001  | 1.5 (1.4, 1.6) | <0.001  |
| <b>By age category vs. ≤45</b>                                     |                    |         |                |         |
| 46 to 55                                                           | 1.3 (1.2, 1.4)     | <0.001  |                |         |
| 56 to 65                                                           | 1.5 (1.4, 1.6)     | <0.001  |                |         |
| 66 to 75                                                           | 2.1 (2.0, 2.2)     | <0.001  |                |         |
| 76 to 85                                                           | 3.3 (3.1, 3.5)     | <0.001  |                |         |
| 86+                                                                | 4.6 (4.2, 5.0)     | <0.001  |                |         |
| <b>Sex</b>                                                         |                    |         |                |         |
| Female vs. male                                                    | 1.5 (1.5, 1.6)     | <0.001  |                |         |
| <b>Comorbidity categories at baseline</b>                          |                    |         |                |         |
| Cardiovascular diseases***                                         | 1.1 (1.1, 1.2)     | <0.001  |                |         |
| Neurologic impairments                                             | 1.5 (1.4, 1.5)     | <0.001  |                |         |
| Endocrine, nutritional and metabolic disease                       | 1.2 (1.1, 1.3)     | <0.001  |                |         |
| Cardiovascular disease X Neurologic impairments                    | 1.0 (1.0, 1.1)     | 0.240   |                |         |
| Cardiovascular disease X Endocrine, nutritional, metabolic disease | 0.9 (0.8, 1.0)     | 0.102   |                |         |
| Neurologic impairments X Endocrine, nutritional, metabolic disease | 1.0 (0.9, 1.2)     | 0.432   |                |         |
| <b>OAB</b>                                                         |                    |         |                |         |
| No OAB vs. OAB (OAB is the reference)                              | 0.8 (0.8, 0.9)     | <0.001  | 0.9 (0.8, 0.9) | <0.001  |
| <b>Interaction between anticholinergic burden and OAB</b>          |                    |         |                |         |
| Low anticholinergic burden X no OAB                                | 1.1 (1.0, 1.2)     | 0.234   | 1.1 (0.9, 1.2) | 0.307   |
| Medium anticholinergic burden X no OAB                             | 1.0 (0.9, 1.1)     | 0.431   | 1.1 (1.0, 1.2) | 0.297   |
| High anticholinergic burden X no OAB                               | 1.2 (1.1, 1.3)     | <0.001  | 1.1 (1.0, 1.3) | 0.055   |

CI: confidence interval; HR: hazard ratio; OAB: overactive bladder; MSM: marginal structural model.

\*The Cox models were implemented using function `coxph` from the R package `survival` version 2.41-3. The marginal structural model was implemented using function `coxph` from R package `survival` version 2.41-3, using the `weight` argument to apply time-varying weights, and setting a cluster term for enrolment id for robust variance estimation. Time-varying weights were calculated using function `ipwrm` from R package `ipw` version 1.0-11, and based on a multinomial model with categorical anticholinergic burden as the outcome, where all greyed-out variables were included as predictor variables.

\*\* Level of anticholinergic burden assessed using the closest 6 month measure prior to the fall or fracture

\*\*\*Cardiovascular disease = cerebrovascular disease + stroke.

**Supplementary Figure 2: Weights used in a marginal structural model for the association between falls and fractures and anticholinergic burden among the OAB cohort (N=154,432), Truven MarketScan databases 2007-2015**

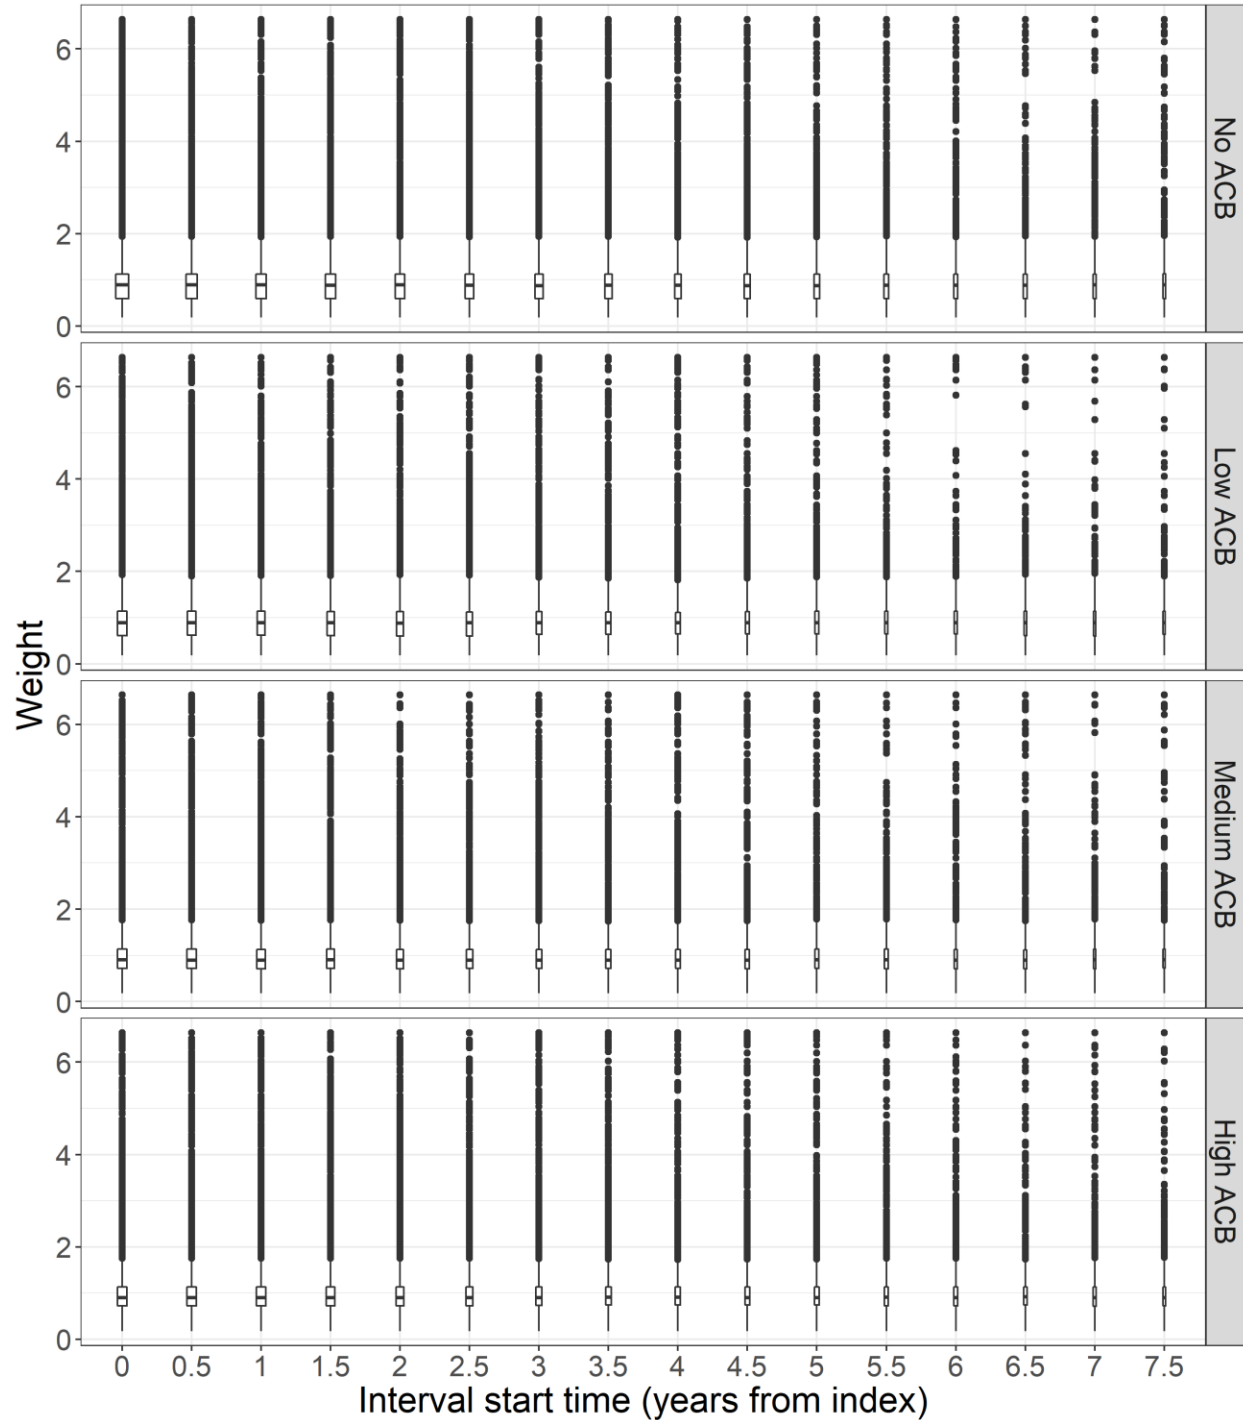

ACB: anticholinergic burden.

Supplementary Figure 3: Weights used in a marginal structural model for the association between falls and fractures and anticholinergic burden, adjusted for important confounders and OAB status (N = 130,449), Truven MarketScan databases 2007-2015

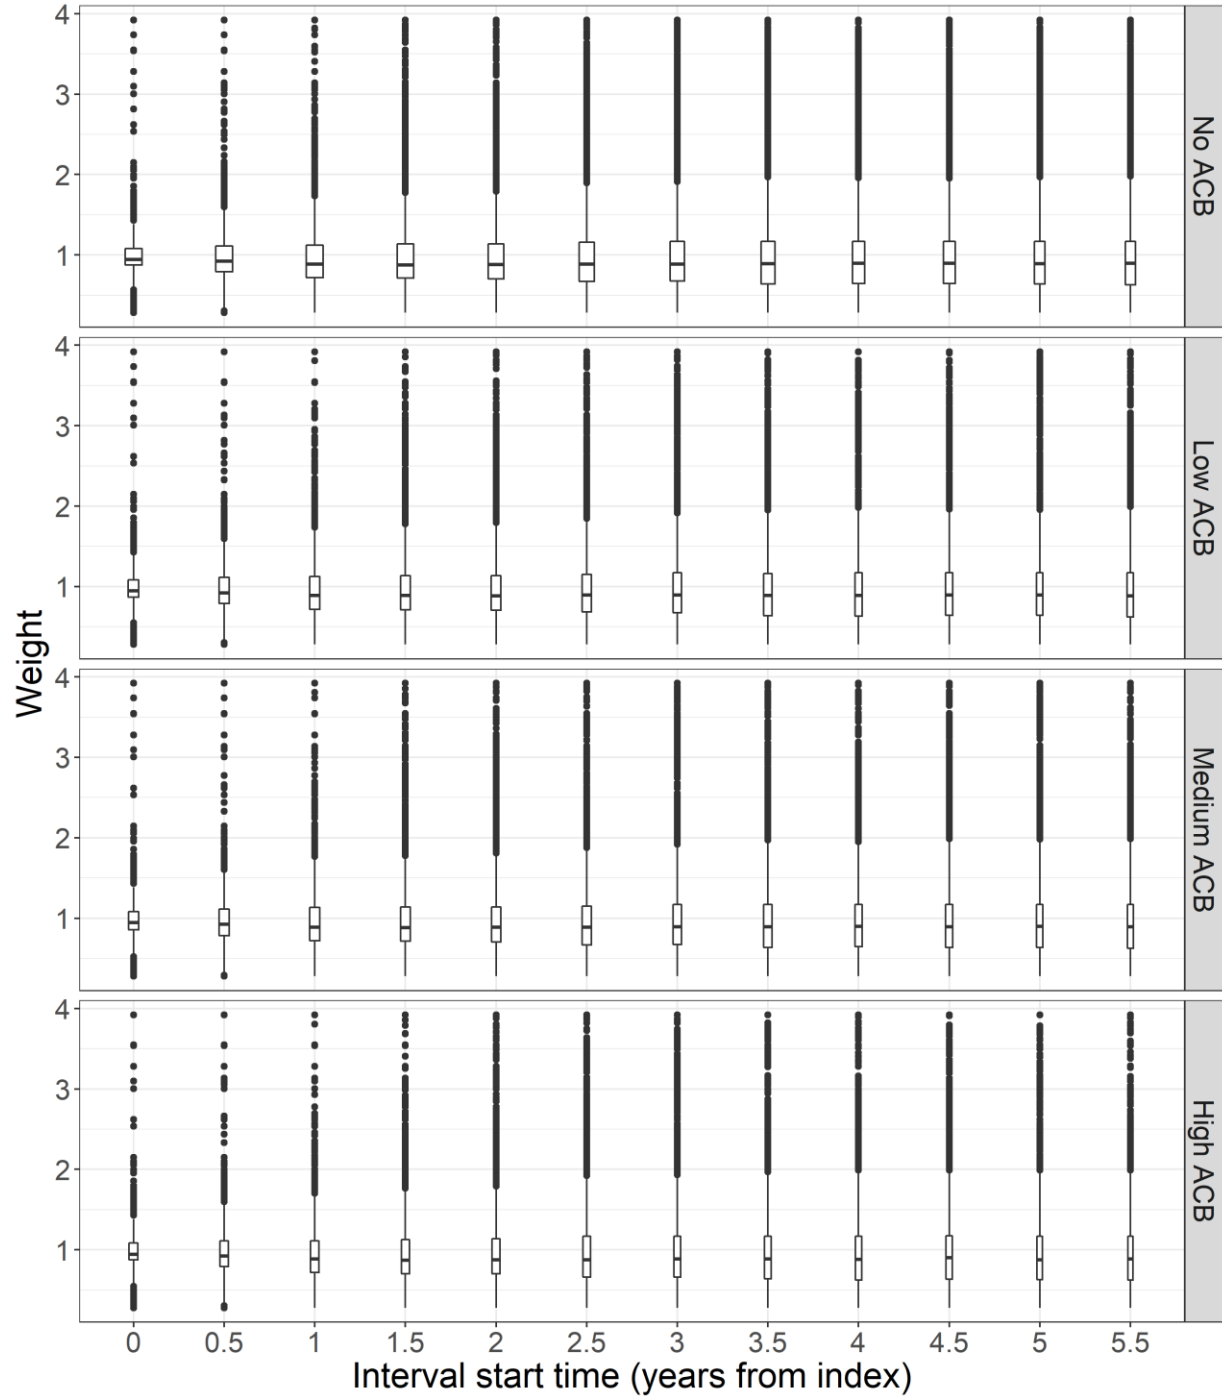

ACB: anticholinergic burden.

**Cumulative anticholinergic burden is associated with falls and fractures in overactive bladder: A retrospective cohort study**

Shelagh M. Szabo MSc, Katherine Gooch PhD, Carol R. Schermer MD MPH, David Walker PhD, Greta Lozano-Ortega MSc, Basia Rogula MSc, Alison Deighton BSc Edward Vonesh PhD, Noll L. Campbell PharmD MS.

STROBE Statement—Checklist of items that should be included in reports of *cohort studies*

|                              | Item No | Recommendation                                                                                                                                                                                                                            | ✓ Pg. No                               |
|------------------------------|---------|-------------------------------------------------------------------------------------------------------------------------------------------------------------------------------------------------------------------------------------------|----------------------------------------|
| <b>Title and abstract</b>    | 1       | (a) Indicate the study's design with a commonly used term in the title or the abstract                                                                                                                                                    | ✓ Pg. 1                                |
|                              |         | (b) Provide in the abstract an informative and balanced summary of what was done and what was found                                                                                                                                       | ✓ Pg. 1                                |
| <b>Introduction</b>          |         |                                                                                                                                                                                                                                           |                                        |
| Background/rationale         | 2       | Explain the scientific background and rationale for the investigation being reported                                                                                                                                                      | ✓ Pg. 4                                |
| Objectives                   | 3       | State specific objectives, including any prespecified hypotheses                                                                                                                                                                          | ✓ Pg. 5                                |
| <b>Methods</b>               |         |                                                                                                                                                                                                                                           |                                        |
| Study design                 | 4       | Present key elements of study design early in the paper                                                                                                                                                                                   | ✓ Pg. 5                                |
| Setting                      | 5       | Describe the setting, locations, and relevant dates, including periods of recruitment, exposure, follow-up, and data collection                                                                                                           | ✓ Pg. 5                                |
| Participants                 | 6       | (a) Give the eligibility criteria, and the sources and methods of selection of participants. Describe methods of follow-up                                                                                                                | ✓ Pg. 5                                |
|                              |         | (b) For matched studies, give matching criteria and number of exposed and unexposed                                                                                                                                                       | ✓ pg.6                                 |
| Variables                    | 7       | Clearly define all outcomes, exposures, predictors, potential confounders, and effect modifiers. Give diagnostic criteria, if applicable                                                                                                  | ✓ pg.7                                 |
| Data sources/<br>measurement | 8*      | For each variable of interest, give sources of data and details of methods of assessment (measurement). Describe comparability of assessment methods if there is more than one group                                                      | ✓ Pg. 5                                |
| Bias                         | 9       | Describe any efforts to address potential sources of bias<br><i>We varied multiple parameters in sensitivity analyses to assess the potential impact of bias and only reported the most important here (see also limitations section)</i> | ✓ Pg.8,9                               |
| Study size                   | 10      | Explain how the study size was arrived at                                                                                                                                                                                                 | ✓ Pg.6,7                               |
| Quantitative variables       | 11      | Explain how quantitative variables were handled in the analyses. If applicable, describe which groupings were chosen and why                                                                                                              | ✓ Pg. 8                                |
| Statistical methods          | 12      | (a) Describe all statistical methods, including those used to control for confounding                                                                                                                                                     | ✓ Pg. 8,9                              |
|                              |         | (b) Describe any methods used to examine subgroups and interactions                                                                                                                                                                       | ✓ Pg. 9                                |
|                              |         | (c) Explain how missing data were addressed                                                                                                                                                                                               | n/a (incomplete records were excluded) |
|                              |         | (d) If applicable, explain how loss to follow-up was addressed                                                                                                                                                                            | n/a                                    |
|                              |         | (e) Describe any sensitivity analyses                                                                                                                                                                                                     | ✓ Pg. 8,9                              |
| <b>Results</b>               |         |                                                                                                                                                                                                                                           |                                        |
| Participants                 | 13*     | (a) Report numbers of individuals at each stage of study—eg numbers potentially eligible, examined for eligibility, confirmed eligible, included in the study, completing follow-up, and analysed                                         | ✓ Pg. 7,9                              |
|                              |         | (b) Give reasons for non-participation at each stage                                                                                                                                                                                      | n/a                                    |

**Cumulative anticholinergic burden is associated with falls and fractures in overactive bladder: A retrospective cohort study**

Shelagh M. Szabo MSc, Katherine Gooch PhD, Carol R. Schermer MD MPH, David Walker PhD, Greta Lozano-Ortega MSc, Basia Rogula MSc, Alison Deighton BSc Edward Vonesh PhD, Noll L. Campbell PharmD MS.

|    |                          |                                                                                                                                                                                                                 |                       |
|----|--------------------------|-----------------------------------------------------------------------------------------------------------------------------------------------------------------------------------------------------------------|-----------------------|
| 1  |                          |                                                                                                                                                                                                                 |                       |
| 2  |                          |                                                                                                                                                                                                                 |                       |
| 3  |                          |                                                                                                                                                                                                                 |                       |
| 4  |                          | (c) Consider use of a flow diagram                                                                                                                                                                              | n/a                   |
| 5  | Descriptive data         | 14* (a) Give characteristics of study participants (eg demographic, clinical, social) and information on exposures and potential confounders                                                                    | ✓ Pg. 9,10<br>Table 1 |
| 6  |                          |                                                                                                                                                                                                                 |                       |
| 7  |                          | (b) Indicate number of participants with missing data for each variable of interest                                                                                                                             | n/a                   |
| 8  |                          |                                                                                                                                                                                                                 |                       |
| 9  |                          | (c) Summarise follow-up time (eg, average and total amount)                                                                                                                                                     | ✓ Pg. 5               |
| 10 |                          |                                                                                                                                                                                                                 |                       |
| 11 |                          | <i>Minimum 1 year, up to 8 years, impact of varying follow up times was directly incorporated into analyses</i>                                                                                                 |                       |
| 12 |                          |                                                                                                                                                                                                                 |                       |
| 13 |                          |                                                                                                                                                                                                                 |                       |
| 14 |                          |                                                                                                                                                                                                                 |                       |
| 15 | Outcome data             | 15 Report numbers of outcome events or summary measures over time                                                                                                                                               | ✓ Pg. 10              |
| 16 |                          |                                                                                                                                                                                                                 |                       |
| 17 | Main results             | 16 (a) Give unadjusted estimates and, if applicable, confounder-adjusted estimates and their precision (eg, 95% confidence interval). Make clear which confounders were adjusted for and why they were included | ✓ Pg. 10-12           |
| 18 |                          |                                                                                                                                                                                                                 |                       |
| 19 |                          | (b) Report category boundaries when continuous variables were categorized                                                                                                                                       | ✓ Pg. 7-8             |
| 20 |                          | (c) If relevant, consider translating estimates of relative risk into absolute risk for a meaningful time period                                                                                                | ✓ Tables 2 & 3        |
| 21 |                          |                                                                                                                                                                                                                 |                       |
| 22 |                          |                                                                                                                                                                                                                 |                       |
| 23 |                          |                                                                                                                                                                                                                 |                       |
| 24 |                          |                                                                                                                                                                                                                 |                       |
| 25 |                          |                                                                                                                                                                                                                 |                       |
| 26 |                          |                                                                                                                                                                                                                 |                       |
| 27 | Other analyses           | 17 Report other analyses done—eg analyses of subgroups and interactions, and sensitivity analyses                                                                                                               | ✓ pg. 11              |
| 28 |                          |                                                                                                                                                                                                                 |                       |
| 29 |                          |                                                                                                                                                                                                                 |                       |
| 30 | <b>Discussion</b>        |                                                                                                                                                                                                                 |                       |
| 31 | Key results              | 18 Summarise key results with reference to study objectives                                                                                                                                                     | ✓ pg. 12              |
| 32 | Limitations              | 19 Discuss limitations of the study, taking into account sources of potential bias or imprecision. Discuss both direction and magnitude of any potential bias                                                   | ✓ pg. 13              |
| 33 |                          |                                                                                                                                                                                                                 |                       |
| 34 |                          |                                                                                                                                                                                                                 |                       |
| 35 |                          |                                                                                                                                                                                                                 |                       |
| 36 | Interpretation           | 20 Give a cautious overall interpretation of results considering objectives, limitations, multiplicity of analyses, results from similar studies, and other relevant evidence                                   | ✓ pg. 14              |
| 37 |                          |                                                                                                                                                                                                                 |                       |
| 38 |                          |                                                                                                                                                                                                                 |                       |
| 39 |                          |                                                                                                                                                                                                                 |                       |
| 40 | Generalisability         | 21 Discuss the generalisability (external validity) of the study results                                                                                                                                        | ✓ pg. 14              |
| 41 |                          |                                                                                                                                                                                                                 |                       |
| 42 | <b>Other information</b> |                                                                                                                                                                                                                 |                       |
| 43 | Funding                  | 22 Give the source of funding and the role of the funders for the present study and, if applicable, for the original study on which the present article is based                                                | ✓ Pg. 20              |
| 44 |                          |                                                                                                                                                                                                                 |                       |
| 45 |                          |                                                                                                                                                                                                                 |                       |
| 46 |                          |                                                                                                                                                                                                                 |                       |
| 47 |                          |                                                                                                                                                                                                                 |                       |
| 48 |                          |                                                                                                                                                                                                                 |                       |
| 49 |                          |                                                                                                                                                                                                                 |                       |
| 50 |                          |                                                                                                                                                                                                                 |                       |
| 51 |                          |                                                                                                                                                                                                                 |                       |
| 52 |                          |                                                                                                                                                                                                                 |                       |
| 53 |                          |                                                                                                                                                                                                                 |                       |
| 54 |                          |                                                                                                                                                                                                                 |                       |
| 55 |                          |                                                                                                                                                                                                                 |                       |
| 56 |                          |                                                                                                                                                                                                                 |                       |
| 57 |                          |                                                                                                                                                                                                                 |                       |
| 58 |                          |                                                                                                                                                                                                                 |                       |
| 59 |                          |                                                                                                                                                                                                                 |                       |
| 60 |                          |                                                                                                                                                                                                                 |                       |



# BMJ Open

## The association between cumulative anticholinergic burden and falls and fractures in patients with overactive bladder: A US-based retrospective cohort study

|                                 |                                                                                                                                                                                                                                                                                                                                                                                                                                                                                                  |
|---------------------------------|--------------------------------------------------------------------------------------------------------------------------------------------------------------------------------------------------------------------------------------------------------------------------------------------------------------------------------------------------------------------------------------------------------------------------------------------------------------------------------------------------|
| Journal:                        | <i>BMJ Open</i>                                                                                                                                                                                                                                                                                                                                                                                                                                                                                  |
| Manuscript ID                   | bmjopen-2018-026391.R2                                                                                                                                                                                                                                                                                                                                                                                                                                                                           |
| Article Type:                   | Research                                                                                                                                                                                                                                                                                                                                                                                                                                                                                         |
| Date Submitted by the Author:   | 08-Mar-2019                                                                                                                                                                                                                                                                                                                                                                                                                                                                                      |
| Complete List of Authors:       | Szabo, Shelagh M; Broadstreet HEOR, Gooch, Katherine; Astellas Pharma Global Development Inc<br>Schermer, Carol; Astellas Pharma Global Development Inc<br>Walker, David; Astellas Pharma Global Development Inc<br>Lozano-Ortega, G; Broadstreet HEOR<br>Rogula, Basia; Broadstreet HEOR<br>Deighton, Alison; Broadstreet HEOR<br>Vonesh, Edward; Northwestern University Feinberg School of Medicine<br>Campbell, Noll; Purdue University College of Pharmacy, Department of Pharmacy Practice |
| <b>Primary Subject Heading</b>: | Pharmacology and therapeutics                                                                                                                                                                                                                                                                                                                                                                                                                                                                    |
| Secondary Subject Heading:      | Urology, Geriatric medicine, Epidemiology                                                                                                                                                                                                                                                                                                                                                                                                                                                        |
| Keywords:                       | Anticholinergic burden, overactive bladder, falls, fractures, observational study, marginal structural models                                                                                                                                                                                                                                                                                                                                                                                    |
|                                 |                                                                                                                                                                                                                                                                                                                                                                                                                                                                                                  |

SCHOLARONE™  
Manuscripts



1  
2  
3  
4 **The association between cumulative anticholinergic burden and falls and fractures in patients with**  
5  
6 **overactive bladder: A US-based retrospective cohort study**  
7

8 Shelagh M. Szabo MSc,<sup>1</sup> Katherine Gooch PhD,<sup>2</sup> Carol R. Schermer MD MPH,<sup>2</sup> David Walker PhD,<sup>2</sup>

9  
10 Greta Lozano-Ortega MSc,<sup>1</sup> Basia Rogula MSc,<sup>1</sup> Alison Deighton BSc,<sup>1</sup> Edward Vonesh PhD,<sup>3</sup> Noll L.

11  
12 Campbell PharmD MS.<sup>4</sup>  
13  
14

15 <sup>1</sup>Broadstreet Health Economics & Outcomes Research, 301 - 343 Railway St, Vancouver, BC, V6A 1A4,  
16 Canada

17 S M Szabo, Principal

18 G Lozano-Ortega, Director

19 B Rogula, Senior Statistician

20 A Deighton, Research Analyst  
21  
22

23 <sup>2</sup>Astellas Pharma Global Development Inc., 1 Astellas Way, Northbrook, IL, 60062, USA

24 K Gooch, Senior Director

25 C Schermer, Senior Medical Director

26 D Walker, Director  
27  
28

29 <sup>3</sup>Department of Preventive Medicine, Feinberg School of Medicine, 420 E Superior St, Chicago, IL  
30 60611, USA

31 E Vonesh, Adjunct Professor  
32  
33

34 <sup>4</sup>College of Pharmacy, Purdue University, 575 Stadium Mall Drive, West Lafayette, IN 47907, USA

35 N Campbell, Assistant Professor  
36  
37  
38

39 **Corresponding author:**  
40

41 Shelagh M. Szabo

42 Telephone: 604 800 0648

43 Email: [sszabo@broadstretheor.com](mailto:sszabo@broadstretheor.com)  
44  
45  
46

47 **Word count: 4,376**

48 **Abstract word count: 299/300**  
49

50 **Number of pages (11), references (47), figures (2) and tables (3)**  
51  
52  
53  
54  
55  
56  
57  
58  
59  
60

1  
2  
3 **Key words:** Anticholinergic burden; overactive bladder; falls; fractures; observational study; marginal  
4 structural models.  
5  
6  
7  
8  
9  
10  
11  
12  
13  
14  
15  
16  
17  
18  
19  
20  
21  
22  
23  
24  
25  
26  
27  
28  
29  
30  
31  
32  
33  
34  
35  
36  
37  
38  
39  
40  
41  
42  
43  
44  
45  
46  
47  
48  
49  
50  
51  
52  
53  
54  
55  
56  
57  
58  
59  
60

For peer review only

## ABSTRACT

**Objective:** To estimate the association between cumulative anticholinergic burden and falls and fractures in patients with overactive bladder (OAB).

**Design:** A retrospective claims-based study (2007-2015) of patients with OAB; outcomes from a subset were contrasted to a non-OAB comparison.

**Setting:** United States, commercially- and Medicare-insured population.

**Participants:** 154,432 adults with OAB and 86,966 adults without OAB; mean age of 56 years, and 67.9% female.

**Main outcome measures:** Cumulative anticholinergic burden, a unitless value representing exposure over time, was estimated over the 12-months pre-index ('at baseline'), and every 6 months post-index. Burden was categorized as no (0), low (1-89), medium (90-499), or high (500+). Unadjusted rates of falls or fractures were estimated, and the increased risk associated with anticholinergic burden (measured at the closest 6-month interval prior to a fall/fracture) was assessed using Cox proportional hazards and marginal structural models.

**Results:** Median (IQR) baseline anticholinergic burden was 30 (0.0-314.0), and higher among older ( $\geq 65$  years; 183 [3.0-713.0]) vs. younger ( $< 65$  years; 13 [0.0-200.0]) adults. The unadjusted rate (95% CI) of falls or fractures over the period was 5.0 per 100 patient-years, ranging from 3.1 (3.0-3.2) for those with no, to 7.4 (7.1-7.6) for those with high burden at baseline. The adjusted risk of falls and fractures was greater with higher anticholinergic burden in the previous 6 months, with a hazard ratio (95% CI) of 1.2 (1.2-1.3) for low vs. no, to 1.4 (1.3-1.4) for high vs. no burden. Estimates from marginal structural models adjusting for time-varying covariates were lower, but remained significantly higher with higher anticholinergic burden. Rates of falls and fractures were approximately 40% higher among those with OAB (vs. those without).

**Conclusion:** Higher levels of anticholinergic burden are associated with higher rates of falls and fractures, highlighting the importance of considering anticholinergic burden when treating patients with OAB.

1  
2  
3  
4  
5  
6  
7  
8  
9  
10  
11  
12  
13  
14  
15  
16  
17  
18  
19  
20  
21  
22  
23  
24  
25  
26  
27  
28  
29  
30  
31  
32  
33  
34  
35  
36  
37  
38  
39  
40  
41  
42  
43  
44  
45  
46  
47  
48  
49  
50  
51  
52  
53  
54  
55  
56  
57  
58  
59  
60

For peer review only

## STRENGTHS AND LIMITATIONS OF THIS STUDY

- This is the first study to demonstrate the association of higher cumulative anticholinergic burden with a higher risk of falls and fractures among those with OAB.
- This study contributes evidence to help inform the appropriate use of anticholinergic medications, both among younger and older patients with OAB who have a higher comorbidity burden.
- The use of a validated generalizable dataset with a large sample size allowed for the calculation of precise estimates of risk and an understanding of the interplay of factors contributing to falls and fractures.
- As with any retrospective study, the findings are limited by the data and duration of follow-up available.
- The findings are also restricted due to the inherent limitations from the use of claims data.

## INTRODUCTION

Falls and fractures, which are major causes of morbidity and mortality among older adults,<sup>1,2</sup> have numerous risk factors, both intrinsic and extrinsic.<sup>2-12</sup> Interactions between one or more of these factors are also important contributors to fall risk.<sup>12-14</sup> Overactive bladder (OAB) is a symptom complex including urinary urgency, with or without urinary incontinence and nocturia, symptoms which are intrinsic risk factors for falls or fractures.<sup>11-13, 15-17</sup> While many patients manage their OAB symptoms with lifestyle modifications alone,<sup>18</sup> among those requiring pharmacotherapy most will initially be treated with anticholinergic medications called antimuscarinics.<sup>19</sup> Cumulative or prolonged exposure to the broader class of anticholinergic medications, which are widely used to manage patients across a variety of health conditions, is also a risk factor for falls and fractures even among populations already at higher risk.<sup>3-7</sup>

To date, studies have infrequently evaluated the impact of OAB treatment<sup>17,20</sup> and never the impact of anticholinergic burden on falls and fractures among those with OAB.<sup>21,22</sup> Few randomized trials of antimuscarinic treatments report the occurrence of falls and those that do, do not report significant differences between OAB treatments or placebo.<sup>23-25</sup> One observational study examining OAB treatments and falls and fractures reported no difference in rates among over 100,000 patients initiating two different antimuscarinics over their first 90 days of treatment; though follow-up times were short.<sup>20</sup> Another reported a slightly protective effect of OAB treatment on falls; but did not measure fractures, nor the intensity of, duration of, or adherence to OAB treatments.<sup>17</sup> However, the impact of anticholinergic burden on falls and fractures risk in OAB would not be driven by antimuscarinic use only, but rather from the total of all prescribed anticholinergic medications; to the best of our knowledge, this has not yet been examined.

Understanding the magnitude of the association between anticholinergic burden and falls and fractures among those with OAB is important for several reasons. First, OAB is highly prevalent, particularly among older adults, affecting up to 18.5% of adults over 40 years of age.<sup>26</sup> Second, the high frequency of major risk factors for falls and fractures (including older age, urinary symptoms<sup>11-13</sup> and gait problems)<sup>27</sup> among those with OAB contribute to an approximately 33% increased risk of falls compared to those without OAB,<sup>28</sup> independent of

1  
2  
3 any incremental risk possibly conveyed by anticholinergic burden. However, if antimuscarinics successfully  
4 manage the symptoms of OAB that are themselves risk factors for falls, it is conceivable that the impact of  
5 treating OAB with antimuscarinics could be a reduction in falls and fractures.<sup>17</sup> Alternatively, anticholinergic  
6 burden could act as an effect modifier of the relationship between OAB symptoms and risk of falls or fractures,  
7 such that its impact would be more or less pronounced among different subgroups of OAB patients. Finally,  
8 unlike certain fall risk factors such as older age or sex, anticholinergic burden is potentially modifiable and at-  
9 risk patients with OAB could be managed by treatments that do not act by the anticholinergic pathway. Due to  
10 the multifactorial nature of falls and fractures risk,<sup>14</sup> the application of rigorous statistical techniques is  
11 required to appropriately control for potential confounders while estimating the association between time-  
12 varying exposures like anticholinergic burden and relevant outcomes.  
13  
14

15  
16  
17  
18  
19  
20  
21  
22  
23  
24 The objective of this study was to estimate the association between anticholinergic burden and falls and  
25 fractures among individuals with OAB. A secondary objective was to compare rates of falls and fractures  
26 among those with OAB to an age- and sex-matched sample without OAB. These data will be important to help  
27 formulate treatment recommendations for patients with OAB at higher falls and fractures risk.  
28  
29  
30  
31  
32  
33  
34  
35

## 36 **METHODS**

### 37 **Study design**

38  
39  
40  
41 This retrospective cohort study used the Truven MarketScan claims databases from the United States (US);  
42 large, nationally-representative healthcare datasets of Commercial Claims and Encounters (Commercial) and  
43 patients insured through Medicare Supplemental and Coordination of Benefits (Medicare Supplemental).  
44  
45 These databases contain individual linked data for over 84 million people, allowing characterization of patient  
46 populations, treatment patterns, clinical outcomes and healthcare resource use (including medication fills).<sup>29</sup>  
47  
48  
49  
50  
51  
52  
53  
54  
55  
56  
57  
58  
59  
60

1  
2  
3 These data have been widely validated for clinical, pharmacoepidemiologic and pharmaco-economic  
4 research.<sup>30-32</sup>  
5  
6

7  
8 The study period was January 2007 to December 2015. For the core analyses, the identification period for  
9 enrolment was from January 2008 to December 2014, to allow  $\geq 1$  year of pre-enrolment data per person for  
10 summarizing baseline characteristics, determining whether an individual is an incident or prevalent case of  
11 OAB (see below) and establishing anticholinergic exposure. The final year of the study period was used to  
12 allow all cohort members the opportunity for  $\geq 1$  year of follow-up post-index date; defined according to the  
13 date of the first identified OAB-related code during the study period. Outcomes could occur at any time  
14 between index date and censoring (e.g. inpatient death, dis-enrolment in the insurance plan, or the end of the  
15 study period).  
16  
17

18  
19 For comparing to individuals without OAB, data from January 2008 to December 2009 were used to enroll  
20 patients in to either a non-OAB cohort or an OAB cohort ('OAB cohort 2'; representing a subset of the core  
21 OAB cohort). All patients were assigned an index date of January 1, 2010 to avoid immortal time bias in  
22 classifying subsequent outcomes to exposure groups.<sup>33</sup> Data from January 2010 to December 2015 were used  
23 to observe the outcomes of interest.  
24  
25

## 26 27 28 **Patient involvement**

29 Patients and the public were not involved in this research.  
30  
31

## 32 33 34 **Study sample**

35  
36 Study inclusion required that individuals be  $\geq 18$  years of age at index date with medical and pharmaceutical  
37 coverage in the twelve months prior to index date. Exclusion criteria were neurogenic bladder/neurogenic  
38 detrusor overactivity, pregnancy, malignant neoplasm, renal impairment, hepatic insufficiency, trauma or  
39 organ transplantation during the study period (Supplementary Table 1). Study eligibility was determined  
40  
41  
42  
43  
44  
45  
46  
47  
48  
49  
50  
51  
52  
53  
54  
55  
56  
57  
58  
59  
60



1  
2  
3 based on the availability of insurance coverage rather than actual resource use; and no exclusion criteria related  
4  
5 to the duration of post-index follow-up was imposed.  
6

7  
8 The OAB cohort included individuals with a) validated ICD-9 codes in any position on  $\geq 1$  inpatient claims, or  
9  
10  $\geq 2$  outpatient medical claims on separate dates, or b)  $\geq 2$  OAB-specific medication claims (by National Drug  
11  
12 Codes [NDCs]), during the identification period (Supplementary Table 1). The date of the first relevant code  
13  
14 during the identification period was the individual's index date. Cohort members were classified as incident if,  
15  
16 in the year prior to index, they had no OAB-specific claims. All other OAB cases were classified as prevalent.  
17  
18 For comparison to the non-OAB cohort, individuals in OAB cohort 2 were required to have one year of data  
19  
20 availability pre-index and potential for data availability through at least 2010. The non-OAB cohort was  
21  
22 randomly selected according to a 2:1 age and sex match to OAB cohort 2. Members of both cohorts were  
23  
24 assigned an index date of January 1<sup>st</sup> 2010 (i.e. the end of the identification period).  
25

26  
27 In terms of sample size, another recent MarketScan study identified over 1 million individuals with OAB over  
28  
29 five years.<sup>34</sup> Fractures, which occur more infrequently than falls, were observed among 5% of a separate OAB  
30  
31 cohort over five years;<sup>15</sup> which would correspond to 50,000 individuals from a cohort of 1 million. While little  
32  
33 is known about anticholinergic burden and falls in OAB, in an Irish study in Parkinson's disease, 24% of those  
34  
35 with high anticholinergic burden had injurious falls vs. 7% of those without anticholinergic burden.<sup>35</sup> To detect  
36  
37 a difference as great in OAB, at  $\alpha=0.05$  and  $\text{power}=0.8$ , 300 individuals per anticholinergic burden level  
38  
39 would be required. Ultimately, of the eligible cohort of over 2 million persons with OAB, a 15% sample was  
40  
41 randomly selected for computational feasibility.  
42

## 43 44 **Classifying exposure and outcomes**

45  
46  
47 The exposure of interest was cumulative anticholinergic burden estimated by applying the score derived from a  
48  
49 cross-sectional measure of anticholinergic exposure (the 2012 version of the Anticholinergic Cognitive Burden  
50  
51 (ACB) scale, a validated scale counting usage of 104 medications rated as contributing at least some  
52  
53  
54  
55  
56  
57  
58  
59  
60

1  
2  
3 anticholinergic burden)<sup>36 37</sup> over time, as outlined in Supplementary Figure 1.<sup>38</sup> Briefly, a unitless value  
4 reflecting the intensity of anticholinergic exposure (by a medication's defined daily dose),<sup>39 40</sup> strength of  
5 anticholinergic activity (by drug-specific ACB score), and period of exposure is estimated, reflecting an  
6 individual's cumulative standardized daily dose of all medications over time (Supplementary Figure 1).<sup>41</sup>  
7  
8  
9

10  
11 Cumulative anticholinergic burden was calculated at baseline (over the 12-month pre-index period) and  
12 updated at six-month intervals. At each time point, an individual's anticholinergic burden was classified as no  
13 vs. any anticholinergic burden; with burden characterized as low (1 to 89), medium (90 to 499) and high  
14 (500+), based on an initial review of histograms of score data. An example patient with low anticholinergic  
15 burden may have received two 90-day fills for 25 mg atenolol (ACB score=1) over a year (cumulative  
16 anticholinergic burden = 60.0); versus a patient with high anticholinergic burden having received one 30-day  
17 fill for 100 mg carbamazepine (ACB score = 1), two 30-day fills for solifenacin 10 mg (ACB score = 3) and  
18 two-90 day fills for tolterodine 4 mg (ACB score = 3) over a year (cumulative anticholinergic burden = 912.0;  
19 additional example calculations provided in Supplementary Figure 1).  
20  
21  
22  
23  
24  
25  
26  
27  
28

29  
30 The primary outcome was a composite of falls and fractures sufficiently severe to require inpatient or  
31 outpatient care, identified by validated ICD-9 and Healthcare Common Procedure Coding System  
32 (HCPCS)/Current Procedural Terminology (CPT) codes (Supplementary Table 1). While these outcomes were  
33 initially considered individually (i.e. as falls, vs. fractures), due to consistency in the trends in results between  
34 the composite and individual outcomes (*data not shown*), the manuscript results focus on the composite  
35 outcome.  
36  
37  
38  
39  
40  
41  
42

### 43 **Statistical analysis**

44  
45  
46 Baseline characteristics were summarized by means, standard deviations (SD), medians and interquartile  
47 ranges (IQR) for continuous variables; and by number and percent for categorical variables. These included  
48 demographics, risk factors for falls and fractures or high anticholinergic burden and other comorbidities.  
49  
50 Comorbidities were considered by overall Elixhauser score<sup>42</sup> and according to key comorbidities (see  
51  
52  
53  
54  
55  
56  
57  
58  
59  
60

1  
2  
3 Supplementary Table 1 for codes). Baseline characteristics were summarized overall and according to age  
4 (<65 vs.  $\geq 65$  years) and sex.  
5  
6

7 Cumulative anticholinergic burden was summarized by the number and percent with no burden vs. any burden  
8 at baseline and at 6-month intervals post-index, mean (95% confidence interval [CI]) scores at baseline and at  
9 6-month intervals post-index and as the five most frequent anticholinergic medications from the ACB scale  
10 prescribed at least once (at the level of the medication and class); overall and by age.  
11  
12  
13  
14

15  
16 The frequency of falls and fractures over the period was estimated according to baseline level of  
17 anticholinergic burden. The unadjusted rate (95%CI) per 100 person-years was estimated using negative  
18 binomial regression models; overall and by age, sex and timing (i.e., an incident vs. prevalent case) of OAB.  
19 Rates were compared according to baseline anticholinergic burden using rate ratios (RR) with 95%CIs.  
20  
21  
22  
23

24 Time to first fall or fracture, according to time-varying levels of cumulative anticholinergic burden (measured  
25 at the closest 6 month interval prior to the fall or fracture) and adjusted for age, sex and other key covariates at  
26 baseline, was estimated using the Andersen-Gill formulation of the Cox proportional hazards model;<sup>43</sup> and  
27 compared between cohorts at different levels of burden using hazard ratios (HRs) with 95%CIs. Potential  
28 covariates for adjustment were identified based on preliminary models and covariates remaining significant  
29 were retained in the final model (see list of potential covariates, identified by literature review, Supplementary  
30 Table 1). While the inclusion of anticholinergic burden as a continuous variable was considered, it was  
31 ultimately included as a categorical variable due to the ease of interpretation from comparing estimates for  
32 categorical levels directly. To understand the impact of age, a subgroup analysis was performed among  
33 patients  $\geq 65$  years at index.  
34  
35  
36  
37  
38  
39  
40  
41  
42  
43  
44

45 Changes in medications or comorbidities over the period may be related to both anticholinergic use and the  
46 occurrence of falls and fractures. To control for these time-varying covariates, as well as all other non-time-  
47 varying covariates included in the non-weighted Cox analysis, a marginal structural model was run.<sup>44</sup> For its  
48 implementation, a multinomial logistic model estimating inverse-probability weights was first developed to  
49  
50  
51  
52  
53  
54  
55  
56  
57  
58  
59  
60

1  
2  
3 predict anticholinergic burden (measured at the closest 6 month interval prior to the fall or fracture) based on  
4 age, sex, and all covariates identified for inclusion. Any comorbidities included as covariates were set to time-  
5 varying, with their indicator set to 'absent' unless a code for the comorbidity was found, after which all  
6 subsequent intervals for that individual had the indicator set to 'present'. Then, the marginal structural model  
7 incorporating the inverse-probability weights was implemented to estimate the HR (95%CI) of falls and  
8 fractures associated with levels of anticholinergic burden among those with OAB, adjusting for age, sex and  
9 other key covariates at baseline. Further details on the marginal structural model, including estimation of  
10 stabilized weights and robust variances, are described by Robins et al, 2000.<sup>45</sup>

11  
12  
13 To compare falls and fractures among those with OAB to the non-OAB cohort, the increased risk according to  
14 level of baseline anticholinergic burden and OAB status was first estimated as unadjusted rates and RRs  
15 (95%CI) and then using adjusted Cox and marginal structural models, as above. OAB status was handled as a  
16 fixed covariate in both the Cox and marginal structural models. To estimate the extent of the modification (by  
17 anticholinergic burden) of the association between OAB and falls and fractures, interaction terms were  
18 included in the model and the effect of OAB for each level of anticholinergic burden was estimated.

19  
20  
21 All analyses were conducted in R version 3.4.0.

## 22 23 24 **RESULTS**

### 25 26 27 **Core analyses**

28  
29  
30 The mean age of the OAB cohort (n=154,432) was 56 years, 75.9% were <65 years, 67.9% were female (Table  
31 1) and the median duration of follow up post-index was 2.5 years. The mean (SD) Elixhauser comorbidity  
32 score was 1.0 (3.9) and 3.6% had a fall or fracture in the preceding year. At baseline (measured over the 12  
33 months pre-index), 35.4% had no, 25.0% had low, 20.5% had moderate and 19.1% had high anticholinergic  
34 burden. Those with any baseline anticholinergic burden were slightly older on average and more likely to be  
35 female. Median (IQR) baseline anticholinergic burden was 30 (0.0 to 314.0); and was substantially higher  
36 among those  $\geq 65$  (183 [3.0 to 713.0]), vs. those <65 (13 [0.0 to 200.0]) years.

## Cumulative anticholinergic burden over time

Despite 35% having no anticholinergic burden at baseline, over 80% of those with OAB (n=124,819) had at least some anticholinergic burden recorded during any of the 6-month intervals over the period. The five most frequent anticholinergic medications prescribed from the ACB scale, two of which were antimuscarinics for OAB, were: codeine (n=27,639, 17.9%; ACB score=1), oxybutynin (n=27,554, 17.8%; ACB score=3), prednisone (n=27,131, 17.6%; ACB score=1), tolterodine (n=26,663; 17.3%; ACB score=3) and cyclobenzaprine (n=21,691; 14.0%; ACB score=2). The most frequent anticholinergic medication classes prescribed were: genitourinary smooth muscle relaxants (n=44,497; 28.8%; which included other antimuscarinics in addition to oxybutynin and tolterodine), antidepressants (n=22,638; 14.7%), beta-blockers (n=21,026; 13.6%), benzodiazepines (n=15,361; 9.9%) and adrenal medications (n=11,728; 7.6%). Mean (95%CI) levels of anticholinergic burden increased over the period and were higher among older vs. younger cohort members (Figure 1).

## Rates of falls and fractures

Among those with OAB, 15,287 (9.9%) experienced a fall (3.3%) or fracture (7.7%) over follow-up; including 3,650 (2.4%) with no baseline anticholinergic burden, 3,495 (2.3%) with low burden, 3,802 (2.5%) with moderate burden and 4,340 (2.8%) with high burden (measured over the 12 months pre-index). The unadjusted rate (95%CI) of falls or fractures was 5.0 (4.9 to 5.1) per 100 patient-years and ranged from 3.1 (3.0 to 3.2) for no baseline anticholinergic burden to 7.4 (7.1 to 7.6) for high burden (Figure 2). For those  $\geq 65$  years, rates were high overall and higher among those with higher baseline anticholinergic burden; from 8.2 (7.6 to 8.8) per 100 person-years for no burden to 11.1 (10.6 to 11.6) for high burden. For those  $<65$  years, rates were lower but also increased with increasing levels of baseline anticholinergic burden; from 2.3 (2.2 to 2.4) per 100 person-years for no burden to 4.8 (4.6 to 5.1) for high burden. When comparing rates between those  $<65$  vs.  $\geq 65$  years at the same level of baseline anticholinergic burden, RRs demonstrate a 2- to 3.5-fold increased risk of falls and fractures among older adults with OAB compared to younger adults with OAB.

1  
2  
3 A 1.9-fold (95%CI: 1.9 to 2.0) increased risk of falls and fractures was observed among those with some vs. no  
4 baseline anticholinergic burden; RRs ranged from 1.5 (1.4 to 1.6) for those with low vs. no anticholinergic  
5 burden to 2.4 (2.3 to 2.5) for those with high vs. no anticholinergic burden (Figure 2). The increased risk of  
6 falls and fractures associated with anticholinergic burden level was more pronounced among younger (<65  
7 years; RR 1.7 [1.6 to 1.8]) vs. older ( $\geq 65$  years; RR 1.4 [1.3 to 1.5]) adults with OAB.  
8  
9  
10  
11  
12

### 13 14 **Adjusted rates of falls and fractures**

15  
16  
17 A statistically significant association was observed between anticholinergic burden (measured at the closest 6  
18 month interval prior to the fall or fracture) and falls and fractures in the Cox model adjusted for age, sex and  
19 key comorbidities; and the magnitude of the association increased with increasing levels of anticholinergic  
20 burden. All key covariates included in the final model are described in Table 2. HRs (95%CI) for falls and  
21 fractures were 1.2 (1.2 to 1.3) for low vs. no anticholinergic burden; 1.3 (1.2 to 1.4) for medium vs. no burden;  
22 and 1.4 (1.3 to 1.4) for high vs. no burden. Findings from the marginal structural model were consistent  
23 although the magnitude of the association was slightly less; HRs (95%CI) were 1.2 (1.1 to 1.2) for low vs. no  
24 burden, 1.2 (1.1 to 1.3) for medium vs. no burden and 1.3 (1.3 to 1.4) for high vs. no burden. Among those  $\geq 65$   
25 years, anticholinergic burden was significantly associated with falls and fractures in the Cox model, but the  
26 association was less than for the overall OAB cohort: 1.1 (1.0 to 1.2) for low vs no burden; 1.2 (1.1 to 1.3) for  
27 medium vs. no burden; and 1.2 (1.1 to 1.3) for high vs. no burden (Table 2). See Supplementary Figure 2 for  
28 boxplots demonstrating the distribution of estimated weights by time and level of anticholinergic burden.  
29  
30  
31  
32  
33  
34  
35  
36  
37  
38  
39  
40  
41

### 42 **Comparison to the non-OAB cohort**

43  
44  
45 To understand the impact of OAB on the association between anticholinergic burden and falls and fractures,  
46 outcomes from 86,966 individuals without OAB and 43,483 individuals with OAB were analyzed. Both  
47 cohorts were 71.0% female and had a mean age of 57.4 years. Mean (SD) Elixhauser comorbidity score was  
48 slightly lower among the non-OAB cohort (0.7 [2.9]) vs. OAB cohort 2 (1.0 [3.6]), as was the percentage with  
49  
50  
51  
52  
53  
54  
55  
56  
57  
58  
59  
60

1  
2  
3 a fall or fracture in the previous year (2.5% for the non-OAB cohort vs. 3.3% for OAB cohort 2). Mean (SD)  
4 baseline anticholinergic burden (assessed over the 12 months pre-index) for OAB cohort 2 was substantially  
5 higher (347.6 [553.8]) than for the non-OAB cohort (89.2 [243.3]), which was reflected in the difference in  
6 distribution according to anticholinergic burden level at baseline. Among OAB cohort 2, 33.9% had no burden  
7 and 25.6% had high burden at baseline, compared to 59.2% with no burden and 4.7% with high burden at  
8 baseline among the non-OAB cohort.  
9  
10  
11  
12  
13  
14

15 The unadjusted rate (95%CI) of falls and fractures per 100 person-years was higher among those with OAB  
16 (4.8 [4.7 to 5.0]) vs. those without (3.5 [3.5 to 3.6]). Rates among OAB cohort 2 ranged from 3.1 (2.9 to 3.3)  
17 for those with no baseline burden to 6.9 (6.6 to 7.3) for high baseline burden; and among the non-OAB cohort,  
18 from 2.7 (2.6 to 2.8) for those with no burden to 8.1 (7.4 to 8.8) among the small sample with high burden.  
19  
20 Overall, those with OAB were at a 1.4-fold (1.3 to 1.5) increased risk of falls and fractures compared to those  
21 without OAB. RRs ranged from 1.2 (1.1 to 1.3) for those with no baseline burden, to 0.9 (0.8 to 0.9) among  
22 those at the highest level of burden (Table 3).  
23  
24  
25  
26  
27  
28  
29

30 Adjusted estimates from the Cox model confirmed the statistically significant association between OAB status  
31 and falls and fractures, which is modified by level of anticholinergic burden (measured at the closest 6 month  
32 interval prior to the fall or fracture; see Supplementary Table 2). Among those with OAB, the HR for low vs.  
33 no anticholinergic burden was 1.3, for medium vs. no anticholinergic burden was 1.3 and for high vs. no  
34 anticholinergic burden was 1.4. Among those without OAB, the HR for low vs. no anticholinergic burden was  
35 1.4, for medium vs. no burden it was 1.4 and for high vs. no burden it was 1.7. Results from the marginal  
36 structural model were similar (Supplemental Table 2), with boxplots demonstrating the distribution of  
37 estimated weights by time and level of anticholinergic burden in Supplemental Figure 3.  
38  
39  
40  
41  
42  
43  
44  
45  
46  
47  
48

## 49 **DISCUSSION**

50  
51  
52  
53  
54  
55  
56  
57  
58  
59  
60



1  
2  
3 While anticholinergic exposure has been associated with higher rates of falls and fractures among those with  
4 other health conditions,<sup>3-7</sup> until now the impact of cumulative anticholinergic burden on the risk of falls and  
5 fractures among those with OAB has been unknown. This large cohort study demonstrated that among those  
6 with OAB, higher cumulative anticholinergic burden is associated with a significantly higher rate of falls and  
7 fractures. After adjustment for age, sex and key comorbidities, the increased risk of falls and fractures was  
8 23% among those at low burden, 30% among those at medium burden and 38% among those at high burden,  
9 compared to those without anticholinergic burden. Rates of falls and fractures were approximately 40% higher  
10 among those with OAB than in a non-OAB comparison group. These data suggest that both urinary symptoms  
11 and anticholinergic burden are important risk factors for falls and fractures. The magnitude of the dose-  
12 response-like association and temporal relationship and the biologic plausibility of the association,<sup>46</sup> lend  
13 credence to possible causality<sup>33</sup> between increasing anticholinergic burden and falls and fractures in OAB.  
14

15 The use of a validated generalizable dataset with a large sample size allowed for the calculation of precise  
16 estimates of risk and an understanding of the interplay of factors contributing to falls and fractures. While  
17 assessing cumulative exposure revealed a dose-response-like relationship with falls and fractures, validating  
18 that measure against cross-sectional assessments will be important. Varied statistical techniques were specified  
19 *a priori*, and results were consistent regardless of the approach selected. Finally, when comparing to the non-  
20 OAB cohort, falls and fractures were assigned according to an individual's OAB status prior to the follow-up  
21 period to avoid the potential for misclassification among those who developed OAB during that period.<sup>47</sup>  
22

23 As with any retrospective study, the findings are limited by the data and duration of follow-up available. As  
24 the study used claims data, misclassification may have occurred if coding is driven by reimbursement-related  
25 factors. Additionally, adherence to anticholinergic medications could not be assessed using these data, only  
26 that a prescription claim was recorded. Given the sampling frame, findings may not be reflective of outcomes  
27 for individuals without or with other types of insurance. As those with intermittent coverage may have been  
28 included, both exposure and outcomes may be underestimated. Additionally, anticholinergic use may be  
29 underestimated as over-the-counter medications, or those not included in the ACB scale, would not have been  
30



1  
2  
3 captured. Further, many other scales for measuring anticholinergic burden exist, and each considers different  
4 medications. While we chose the ACB scale because of its relevance to the US and the comprehensive list of  
5 medications considered,<sup>36 37</sup> the choice of anticholinergic burden scale could impact the results. Limitations to  
6 the ACB scale include that the scores assigned to various medications have not been validated against serum  
7 anticholinergic activity, and that it omits some medications with anticholinergic activity (for example,  
8 gabapentin) in its derivation, which is based upon expert consensus and literature review. Finally, it is  
9 conceivable that those with higher anticholinergic burden would have more encounters with the medical  
10 system within which to detect falls or fractures. We did not adjust for this, however, as the health conditions  
11 underlying the increased healthcare resource use would also be on the causal pathway between anticholinergic  
12 exposure and falls and fractures.

13  
14  
15  
16  
17  
18  
19  
20  
21  
22  
23  
24 Few other robust data on the impact of cumulative anticholinergic exposure on falls and fractures among those  
25 with OAB exist. A recent US claims-based study found that antimuscarinic-treated OAB patients were at an  
26 almost 50% increased risk of falls and fractures compared to those without OAB, even without measuring  
27 overall anticholinergic burden, although those analyses did not account for other important risk factors.<sup>48</sup> A  
28 borderline significant association was reported between antimuscarinic use and fractures among Taiwanese  
29 patients with OAB, although assessment of anticholinergic burden was based on a single dispensation only.<sup>49</sup>  
30 That increased anticholinergic burden was associated with increased falls and fractures among those with OAB  
31 is consistent with findings from those with Parkinson's disease,<sup>5</sup> depression<sup>50</sup> and among post-menopausal  
32 women.<sup>4</sup> Exact estimates of increased risk are difficult to compare directly because most studies measured  
33 burden cross-sectionally not cumulatively. Nonetheless, the available evidence suggests a consistent message  
34 of increased falls and fractures risk with increased anticholinergic exposure and that the amount of increased  
35 risk depends on the extent of anticholinergic burden as well as the underlying disease. Future research may  
36 build off these findings by evaluating the impact of OAB-specific treatment on OAB symptoms that are risk  
37 factors for falls and fractures, while accurately accounting for background level of cumulative anticholinergic  
38  
39  
40  
41  
42  
43  
44  
45  
46  
47  
48  
49  
50  
51  
52  
53  
54  
55  
56  
57  
58  
59  
60

1  
2  
3 burden. This is important as successful management of OAB symptoms with antimuscarinics may, in itself,  
4 decrease the risk of falls and fractures.  
5

6  
7 Older adults had a 3.3-fold increased risk of falls and fractures compared to younger adults with OAB and a 2-  
8 to 3.5-fold increased risk at each level of anticholinergic burden. While we were surprised that the increased  
9 risk of falls and fractures associated with anticholinergic burden was less marked among older adults with  
10 OAB – a finding consistent in both the unadjusted and adjusted analyses – there are a few plausible  
11 explanations. One is that the baseline risk of falls or fractures is much higher among older adults. This suggests  
12 that older adults with OAB likely have many predisposing factors other than anticholinergic burden compared  
13 to younger OAB patients for whom anticholinergic burden may be the main contributing risk factor.  
14  
15 Regardless of the mechanism, these findings highlight the importance of medication review for falls risk  
16 among younger and older patients with OAB.<sup>51 52</sup>  
17  
18

19  
20 In an administrative database study of patients with OAB, higher levels of anticholinergic burden are  
21 associated with a higher rate of falls and fractures; with those at the highest level at an almost 40% increased  
22 risk of falls and fractures compared to those without anticholinergic burden. These data will help inform the  
23 appropriate use of anticholinergic medications among both younger and older OAB patients with multifaceted  
24 comorbidity requiring anticholinergic exposure.<sup>53</sup>  
25  
26  
27  
28  
29  
30  
31  
32  
33  
34  
35  
36  
37  
38  
39  
40  
41  
42  
43  
44  
45  
46  
47  
48  
49  
50  
51  
52  
53  
54  
55  
56  
57  
58  
59  
60

## Tables and figures

**Table 1 Demographic and clinical characteristics of the OAB cohort at baseline; Truven MarketScan databases 2007-2015**

|                                                     | Overall     |        | By age      |        |            |        | By baseline anticholinergic burden* |        |             |        | By sex     |        |             |        |
|-----------------------------------------------------|-------------|--------|-------------|--------|------------|--------|-------------------------------------|--------|-------------|--------|------------|--------|-------------|--------|
|                                                     |             |        | <65         |        | ≥65        |        | No burden                           |        | Some burden |        | Male       |        | Female      |        |
|                                                     | N = 154,432 |        | N = 117,271 |        | N = 37,161 |        | N = 54,602                          |        | N = 99,830  |        | N = 49,597 |        | N = 104,835 |        |
|                                                     | n           | %      | n           | %      | n          | %      | n                                   | %      | n           | %      | n          | %      | n           | %      |
| <b>Age (years)</b>                                  |             |        |             |        |            |        |                                     |        |             |        |            |        |             |        |
| Mean (SD)                                           | 55.7        | 15.2   | 49.4        | 11.0   | 75.7       | 7.5    | 51.4                                | 14.6   | 58.1        | 15.0   | 56.2       | 14.0   | 55.5        | 15.8   |
| Median (IQR)                                        | 56          | 46, 64 | 52          | 43, 58 | 75         | 69, 81 | 52                                  | 42, 60 | 58          | 49, 68 | 57         | 48, 64 | 55          | 46, 64 |
| ≤45                                                 | 36,039      | 23.3   | 36,039      | 30.7   | 0          | 0      | 17,300                              | 31.7   | 18,739      | 18.8   | 9,915      | 20     | 26,124      | 24.9   |
| 46-55                                               | 39,784      | 25.8   | 39,784      | 33.9   | 0          | 0      | 15,357                              | 28.1   | 24,427      | 24.5   | 12,743     | 25.7   | 27,041      | 25.8   |
| 56-65                                               | 43,414      | 28.1   | 41,448      | 35.3   | 1,966      | 5.3    | 14,610                              | 26.8   | 28,804      | 28.9   | 16,160     | 32.6   | 27,254      | 26     |
| 66-75                                               | 17,649      | 11.4   | 0           | 0      | 17,649     | 47.5   | 4,383                               | 8      | 13,266      | 13.3   | 6,115      | 12.3   | 11,534      | 11     |
| 76-85                                               | 13,099      | 8.5    | 0           | 0      | 13,099     | 35.2   | 2,341                               | 4.3    | 10,758      | 10.8   | 3,765      | 7.6    | 9,334       | 8.9    |
| 86+                                                 | 4,447       | 2.9    | 0           | 0      | 4,447      | 12     | 611                                 | 1.1    | 3,836       | 3.8    | 899        | 1.8    | 3,548       | 3.4    |
| <b>Female sex</b>                                   | 104,835     | 67.9   | 79,159      | 67.5   | 25,676     | 69.1   | 29,999                              | 54.9   | 74,836      | 75.0   | 0          | 0      | 104,835     | 100.0  |
| <b>Comorbidities†</b>                               |             |        |             |        |            |        |                                     |        |             |        |            |        |             |        |
| Hypertension, uncomplicated                         | 55,900      | 36.2   | 35,332      | 30.1   | 20,568     | 55.3   | 14,401                              | 26.4   | 41,499      | 41.6   | 19,895     | 40.1   | 36,005      | 34.3   |
| Diabetes mellitus & diabetic peripheral neuropathy  | 21,490      | 13.9   | 13,424      | 11.4   | 8,066      | 21.7   | 5,540                               | 10.1   | 15,950      | 16.0   | 8,205      | 16.5   | 13,285      | 12.7   |
| Cerebrovascular disease and stroke                  | 8,517       | 5.5    | 3,180       | 2.7    | 5,337      | 14.4   | 1,599                               | 2.9    | 6,918       | 6.9    | 2,905      | 5.9    | 5,612       | 5.4    |
| Dizziness                                           | 8,398       | 5.4    | 5,366       | 4.6    | 3,032      | 8.2    | 1,905                               | 3.5    | 6,493       | 6.5    | 2,249      | 4.5    | 6,149       | 5.9    |
| Osteoporosis                                        | 6,609       | 4.3    | 3,162       | 2.7    | 3,447      | 9.3    | 1,626                               | 3.0    | 4,983       | 5.0    | 471        | 0.9    | 6,138       | 5.9    |
| Arthritis                                           | 6,345       | 4.1    | 4,370       | 3.7    | 1,975      | 5.3    | 1,295                               | 2.4    | 5,050       | 5.1    | 1,097      | 2.2    | 5,248       | 5.0    |
| Falls or fractures within the preceding year        | 5,542       | 3.6    | 3,059       | 2.6    | 2,483      | 6.7    | 1,163                               | 2.1    | 4,379       | 4.4    | 1,210      | 2.4    | 4,332       | 4.1    |
| <b>Lifestyle factors</b>                            |             |        |             |        |            |        |                                     |        |             |        |            |        |             |        |
| Smoking                                             | 13,548      | 8.8    | 8,836       | 7.5    | 4,712      | 12.7   | 2,956                               | 5.4    | 10,592      | 10.6   | 4,426      | 8.9    | 9,122       | 8.7    |
| Alcohol abuse                                       | 768         | 0.5    | 658         | 0.6    | 110        | 0.3    | 188                                 | 0.3    | 580         | 0.6    | 374        | 0.8    | 394         | 0.4    |
| <b>Medications</b>                                  |             |        |             |        |            |        |                                     |        |             |        |            |        |             |        |
| Opioids                                             | 56,036      | 36.3   | 41,608      | 35.5   | 14,428     | 38.8   | 11,044                              | 20.2   | 44,992      | 45.1   | 14,887     | 30.0   | 41,149      | 39.3   |
| Benzodiazepine use                                  | 27,507      | 17.8   | 20,252      | 17.3   | 7,255      | 19.5   | 2,349                               | 4.3    | 25,158      | 25.2   | 5,882      | 11.9   | 21,625      | 20.6   |
| Chronic use of inhaled or oral corticosteroids      | 5,367       | 3.5    | 3,306       | 2.8    | 2,061      | 5.5    | 888                                 | 1.6    | 4,479       | 4.5    | 1,492      | 3.0    | 3,875       | 3.7    |
| <b>Risk factors for high anticholinergic burden</b> |             |        |             |        |            |        |                                     |        |             |        |            |        |             |        |

|                                                  | Overall     |            | By age      |            |            |            | By baseline anticholinergic burden* |            |             |             | By sex     |            |             |            |
|--------------------------------------------------|-------------|------------|-------------|------------|------------|------------|-------------------------------------|------------|-------------|-------------|------------|------------|-------------|------------|
|                                                  |             |            | <65         |            | ≥65        |            | No burden                           |            | Some burden |             | Male       |            | Female      |            |
|                                                  | N = 154,432 |            | N = 117,271 |            | N = 37,161 |            | N = 54,602                          |            | N = 99,830  |             | N = 49,597 |            | N = 104,835 |            |
|                                                  | n           | %          | n           | %          | n          | %          | n                                   | %          | n           | %           | n          | %          | n           | %          |
| Depression, neurotic disorders, or psychosis     | 32,674      | 21.2       | 27,037      | 23.1       | 5,637      | 15.2       | 7,838                               | 14.4       | 24,836      | 24.9        | 8,135      | 16.4       | 24,539      | 23.4       |
| COPD                                             | 10,016      | 6.5        | 5,604       | 4.8        | 4,412      | 11.9       | 1,824                               | 3.3        | 8,192       | 8.2         | 3,167      | 6.4        | 6,849       | 6.5        |
| Parkinson's disease/other neurologic impairments | 5,973       | 3.9        | 3,401       | 2.9        | 2,572      | 6.9        | 1,059                               | 1.9        | 4,914       | 4.9         | 1,847      | 3.7        | 4,126       | 3.9        |
| Dementia                                         | 1,570       | 1.0        | 138         | 0.1        | 1,432      | 3.9        | 216                                 | 0.4        | 1,354       | 1.4         | 408        | 0.8        | 1,162       | 1.1        |
| Intestinal motility disorders                    | 152         | 0.1        | 107         | 0.1        | 45         | 0.1        | 43                                  | 0.1        | 109         | 0.1         | 39         | 0.1        | 113         | 0.1        |
| <b>Elixhauser score, mean (SD)</b>               | <b>1</b>    | <b>3.9</b> | <b>1</b>    | <b>3.3</b> | <b>3</b>   | <b>5.0</b> | <b>1</b>                            | <b>3.0</b> | <b>1</b>    | <b>4.3</b>  | <b>1</b>   | <b>3.9</b> | <b>1</b>    | <b>3.9</b> |
| <b>Timing of OAB</b>                             |             |            |             |            |            |            |                                     |            |             |             |            |            |             |            |
| Incident case                                    | 106,730     | 69.1       | 84,888      | 72.4       | 21,842     | 58.8       | 43,688                              | 80.0       | 63,042      | 63.1        | 36,783     | 74.2       | 69,947      | 66.7       |
| Prevalent case                                   | 47,702      | 30.9       | 32,383      | 27.6       | 15,319     | 41.2       | 10,914                              | 20.0       | 36,788      | 36.9        | 12,814     | 25.8       | 34,888      | 33.3       |
| <b>Anticholinergic burden</b>                    |             |            |             |            |            |            |                                     |            |             |             |            |            |             |            |
| Mean (SD)                                        | 266.7       | 486.5      | 213.8       | 443.9      | 433.8      | 570.3      | 0                                   | 0          | 412.6       | 553.2       | 154.2      | 365.3      | 320.0       | 526.1      |
| Median (IQR)                                     | 30          | 0.0, 314.0 | 13          | 0.0, 200.0 | 183        | 3.0, 713.0 | 0                                   | 0.0, 0.0   | 180         | 36.0, 609.0 | 1          | 0.0, 120.0 | 60.0        | 0.0, 445.5 |
| No burden                                        | 54,602      | 35.4       | 46,746      | 39.9       | 7,856      | 21.1       | 54,602                              | 100.0      | 0           | 0           | 24,603     | 49.6       | 29,999      | 28.6       |
| Low                                              | 38,669      | 25.0       | 31,229      | 26.6       | 7,440      | 20.0       | 0                                   | 0          | 38,669      | 38.7        | 11,504     | 23.2       | 27,165      | 25.9       |
| Medium                                           | 31,719      | 20.5       | 22,006      | 18.8       | 9,713      | 26.1       | 0                                   | 0          | 31,719      | 31.8        | 8,460      | 17.1       | 23,259      | 22.2       |
| High                                             | 29,442      | 19.1       | 17,290      | 14.7       | 12,152     | 32.7       | 0                                   | 0          | 29,442      | 29.5        | 5,030      | 10.1       | 24,412      | 23.3       |

COPD: chronic obstructive pulmonary disease; IQR: interquartile range; OAB: overactive bladder; SD: standard deviation

\*Baseline anticholinergic burden assessed over the 12 month pre-index period

†Only comorbidities identified among >2.5% are presented. The following were identified among <2.5% of the cohort; syncope, complicated hypertension, cognitive impairment, Alzheimer's disease, musculoskeletal problems, hyperparathyroidism, decreased vision, chronic kidney disease, leg and foot amputation, hypotension, palmonental reflex.

**Table 2 Adjusted (left) Cox model- and (right) marginal structural model-estimated hazard ratios (95% CI) for the association between falls and fractures and anticholinergic burden among the OAB cohort (N=154,432), including the subgroup aged  $\geq 65$  years (middle); Truven MarketScan databases 2007-2015**

|                                                                    | Cox model*         |         |                               |         | Marginal structural model* |         |
|--------------------------------------------------------------------|--------------------|---------|-------------------------------|---------|----------------------------|---------|
|                                                                    | Overall population |         | Subgroup aged $\geq 65$ years |         | Overall population         |         |
|                                                                    | HR (95%CI)         | p-value | HR (95%CI)                    | p-value | HR (95%CI)                 | p-value |
| <b>By anticholinergic burden level vs. no burden†</b>              |                    |         |                               |         |                            |         |
| Low (1 – 89)                                                       | 1.2 (1.2, 1.3)     | <0.001  | 1.1 (1.0, 1.2)                | 0.006   | 1.2 (1.1, 1.2)             | <0.001  |
| Medium (90 – 499)                                                  | 1.3 (1.2, 1.4)     | <0.001  | 1.2 (1.1, 1.3)                | <0.001  | 1.2 (1.1, 1.3)             | <0.001  |
| High (500+)                                                        | 1.4 (1.3, 1.4)     | <0.001  | 1.2 (1.1, 1.3)                | <0.001  | 1.3 (1.3, 1.4)             | <0.001  |
| <b>By age category vs. <math>\leq 45</math></b>                    |                    |         |                               |         |                            |         |
| 46 to 55                                                           | 1.3 (1.2, 1.3)     | <0.001  | 1.7 (1.6, 1.7)‡               | <0.001  | 1.2 (1.2, 1.3)             | <0.001  |
| 56 to 65                                                           | 1.5 (1.4, 1.6)     | <0.001  |                               |         | 1.5 (1.4, 1.6)             | <0.001  |
| 66 to 75                                                           | 2.3 (2.2, 2.4)     | <0.001  |                               |         | 2.3 (2.1, 2.5)             | <0.001  |
| 76 to 85                                                           | 3.4 (3.2, 3.6)     | <0.001  |                               |         | 3.5 (3.3, 3.9)             | <0.001  |
| 86+                                                                | 5.0 (4.6, 5.4)     | <0.001  |                               |         | 5.6 (5.0, 6.3)             | <0.001  |
| <b>Sex</b>                                                         |                    |         |                               |         |                            |         |
| Female vs. male                                                    | 1.5 (1.5, 1.6)     | <0.001  | 1.6 (1.5, 1.7)                | <0.001  | 1.5 (1.5, 1.6)             | <0.001  |
| <b>Comorbidity categories at baseline</b>                          |                    |         |                               |         |                            |         |
| Cardiovascular diseases§                                           | 1.1 (1.1, 1.1)     | 0.018   | 1.2 (1.1, 1.2)                | <0.001  | 1.1 (1.0, 1.1)             | 0.043   |
| Neurologic impairments                                             | 1.5 (1.4, 1.6)     | <0.001  | 1.7 (1.5, 1.8)                | <0.001  | 1.5 (1.4, 1.6)             | <0.001  |
| Endocrine, nutritional and metabolic disease                       | 1.1 (1.1, 1.2)     | <0.001  | 1.2 (1.1, 1.4)                | <0.001  | 1.2 (1.1, 1.3)             | <0.001  |
| Cardiovascular disease X Neurologic impairments                    | 1.1 (1.0, 1.2)     | 0.042   | 1.0 (0.9, 1.1)                | 0.945   | 1.1 (1.0, 1.2)             | 0.048   |
| Cardiovascular disease X Endocrine, nutritional, metabolic disease | 1.0 (1.0, 1.1)     | 0.750   | 0.9 (0.8, 1.0)                | 0.118   | 0.9 (0.8, 1.0)             | 0.219   |
| Neurologic impairments X Endocrine, nutritional, metabolic disease | 1.1 (1.0, 1.2)     | 0.092   | 1.0 (0.9, 1.1)                | 0.786   | 1.0 (0.9, 1.2)             | 0.558   |

CI: confidence interval; HR: hazard ratio; OAB: overactive bladder.

\*The Cox models were implemented using function `coxph` from the R package `survival` version 2.41-3. The marginal structural model was implemented using function `coxph` from R package `survival` version 2.41-3, using the `weight` argument to apply time-varying weights, and setting a cluster term for enrolment id for robust variance estimation. Time-varying weights were calculated using function `ipwrm` from R package `ipw` version 1.0-11, and based on a multinomial logistic regression model (using a generalized logit link) with categorical time-varying anticholinergic burden as the outcome, where age, sex, and time-varying comorbidity categories as well as all two-way interactions between them were included as predictor variables.

†Level of anticholinergic burden assessed using the closest 6 month measure prior to the fall or fracture

‡For the subgroup analysis among those aged  $\geq 65$  years, age categories for comparison were 65 to <74 years, vs.  $\geq 75$  vs <75 years

§Cardiovascular disease = cerebrovascular disease + stroke.

For peer review only

1  
2  
3  
4  
5  
6  
7  
8  
9  
10  
11  
12  
13  
14  
15  
16  
17  
18  
19  
20  
21  
22  
23  
24  
25  
26  
27  
28  
29  
30  
31  
32  
33  
34  
35  
36  
37  
38  
39  
40  
41  
42  
43  
44  
45  
46  
47

**Table 3** Rates and rate ratios for falls and fractures estimated over the study period among OAB cohort 2 and non-OAB cohort, according to baseline anticholinergic burden; Truven MarketScan databases 2007-2015

|                                                             | OAB cohort 2<br>N = 43,483 | Non-OAB cohort<br>N = 86,966 | OAB vs. non-OAB rate ratios<br>N = 130,449 |
|-------------------------------------------------------------|----------------------------|------------------------------|--------------------------------------------|
| <b>Fall and fracture rates (95%CI) per 100 person-years</b> |                            |                              |                                            |
| Overall, crude rate                                         | 4.8 (4.7, 5.0)             | 3.5 (3.5, 3.6)               | 1.4 (1.3, 1.5)                             |
| By baseline anticholinergic burden level*                   |                            |                              |                                            |
| No burden (0)                                               | 3.1 (2.9, 3.3)             | 2.7 (2.6, 2.8)               | 1.2 (1.1, 1.3)                             |
| Low (1-89)                                                  | 4.3 (4.0, 4.6)             | 3.8 (3.6, 4.0)               | 1.1 (1.0, 1.2)                             |
| Medium (90-499)                                             | 5.5 (5.2, 5.8)             | 5.1 (4.9, 5.4)               | 1.1 (1.0, 1.2)                             |
| High (500+)                                                 | 6.9 (6.6, 7.3)             | 8.1 (7.4, 8.8)               | 0.9 (0.8, 0.9)                             |
| <b>Rate ratios, by anticholinergic burden level</b>         |                            |                              |                                            |
| Any vs. no burden                                           | 1.8 (1.7, 1.9)             | 1.8 (1.7, 1.9)               |                                            |
| Low vs. no burden                                           | 1.4 (1.3, 1.5)             | 1.4 (1.3, 1.5)               |                                            |
| Medium vs. no burden                                        | 1.7 (1.6, 1.9)             | 1.9 (1.8, 2.0)               |                                            |
| High vs. no burden                                          | 2.2 (2.0, 2.4)             | 3.0 (2.7, 3.3)               |                                            |

CI: confidence interval; OAB: overactive bladder

\*Baseline anticholinergic burden assessed over the 12 month pre-index period

## REQUIRED STATEMENTS

**Contributorship statement:** SM Szabo and K Gooch were responsible for the conception and design of the work. SM Szabo, G Lozano-Ortega, B Rogula and A Deighton were responsible for data collection. S M Szabo, G Lozano-Ortega, B Rogula , K Gooch C Schermer, D Walker, E Vonesh, N Campbell, and A Deighton were responsible for data analysis and interpretation. SM Szabo was responsible for drafting the article. S M Szabo, K Gooch, C Schermer, D Walker, G Lozano-Ortega, B Rogula, A Deighton, E Vonesh, N Campbell were responsible for critical revision of the article. S M Szabo, K Gooch, C Schermer, D Walker, G Lozano-Ortega, B Rogula, A Deighton, E Vonesh, and N Campbell were responsible for final approval of the version to be published.

**Copyright:** The Corresponding Author has the right to grant on behalf of all authors and does grant on behalf of all authors, a worldwide licence to the Publishers and its licensees in perpetuity, in all forms, formats and media (whether known now or created in the future), to i) publish, reproduce, distribute, display and store the Contribution, ii) translate the Contribution into other languages, create adaptations, reprints, include within collections and create summaries, extracts and/or, abstracts of the Contribution, iii) create any other derivative work(s) based on the Contribution, iv) to exploit all subsidiary rights in the Contribution, v) the inclusion of electronic links from the Contribution to third party material where-ever it may be located; and, vi) licence any third party to do any or all of the above.

**Competing interest statement:** All authors have completed the ICMJE form for Disclosure of Potential Conflicts of Interest (available on request from the corresponding author). Shelagh Szabo, Greta Lozano-Ortega, Alison Deighton and Basia Rogula declare a relevant conflict of interest for the work under consideration for publication as Broadstreet received funding from Astellas for the design and analysis of the data for this study; they declare no conflicts relative to financial activities outside of the submitted work, intellectual property or other relationships not covered. Katherine Gooch, Carol Schermer and David Walker declare a relevant conflict of interest to the work under consideration for publication and for relevant financial activities outside of the submitted work as they are or were employees of Astellas Pharma, the funder of the study, at the time of study completion; they declare no conflicts relative to intellectual property or other relationships not covered. Edward Vonesh declares a relevant conflict of interest for the work under consideration for publication and for relevant financial activities outside of the submitted work as he received personal fees for consultancy for Astellas Pharma, the study funder; he declares no conflicts relative to intellectual property or other relationships not covered. Noll Campbell declares a relevant conflict of interest for relevant financial activities outside of the submitted work as he received personal fees for consultancy for Astellas Pharma, the study funder; he declares no conflicts relative to the work under consideration for publication, intellectual property or other relationships not covered.

**Transparency:** Shelagh M Szabo affirms that this manuscript is an honest, accurate, and transparent account of the study being reported; that no important aspects of the study have been omitted; and that any discrepancies from the study as planned (and, if relevant, registered) have been explained.



1  
2  
3  
4  
5 **Ethics:** Because the Truven MarketScan data are de-identified and are fully HIPAA compliant, and  
6 because this study did not involve the collection, use, or transmittal of individually identifiable data,  
7 Institutional Review Board review or approval was not required.  
8  
9

10 **Disclosures:**

11 Katherine Gooch, Carol Schermer and David Walker = Are/were employees, Astellas Pharma Global  
12 Development, Inc. at the time of study completion  
13

14 Shelagh Szabo, Greta Lozano-Ortega, Basia Rogula, and Alison Deighton = Employees of Broadstreet  
15 HEOR, which received payment from Astellas to conduct the study  
16

17 Edward Vonesh and Noll Campbell = Received payment from Astellas for consultation  
18  
19  
20

21 **Funding and role of study sponsor:** The present study was initiated by Astellas Pharma Global  
22 Development, Inc., and funding for the conduct of this study was provided by Astellas Pharma Global  
23 Development, Inc. Publication of the study results was not contingent on permission from the sponsor.  
24

25 **Data sharing:** The authors confirm that all data required to replicate our findings is available for  
26 purchase by any researcher from Truven MarketScan via this link  
27 <https://marketscan.truvenhealth.com/marketscanportal/>  
28

29 **Acknowledgement:** We would like to thank Elizabeth Badillo for drafting, reviewing and editing this  
30 manuscript. Elizabeth Badillo is an employee of Broadstreet HEOR, which received payment from  
31 Astellas.  
32

33 The corresponding author attests that all listed authors meet authorship criteria and that no others meeting  
34 the criteria have been omitted.  
35  
36  
37  
38  
39  
40  
41  
42  
43  
44  
45  
46  
47  
48  
49  
50  
51  
52  
53  
54  
55  
56  
57  
58  
59  
60

## REFERENCES

1. Tinetti ME, Speechley M, Ginter SF. Risk factors for falls among elderly persons living in the community. *N Engl J Med* 1988;319(26):1701-7. doi: 10.1056/nejm198812293192604 [published Online First: 1988/12/29]
2. Nevitt MC, Cummings SR, Hudes ES. Risk factors for injurious falls: a prospective study. *J Gerontol* 1991;46(5):M164-70.
3. Zia A, Kamaruzzaman S, Myint PK, et al. Anticholinergic burden is associated with recurrent and injurious falls in older individuals. *Maturitas* 2016;84:32-37.
4. Marcum ZA, Wirtz HS, Pettinger M, et al. Anticholinergic medication use and falls in postmenopausal women: findings from the women's health initiative cohort study. *BMC Geriatr* 2016;16:76. doi: 10.1186/s12877-016-0251-0
5. Crispo JA, Willis AW, Thibault DP, et al. Associations between Anticholinergic Burden and Adverse Health Outcomes in Parkinson Disease. *PloS one* 2016;11(3):e0150621.
6. Aizenberg D, Sigler M, Weizman A, et al. Anticholinergic burden and the risk of falls among elderly psychiatric inpatients: a 4-year case-control study. *Int Psychogeriatr* 2002;14(3):307-10.
7. Marcum ZA, Perera S, Thorpe JM, et al. Anticholinergic Use and Recurrent Falls in Community-Dwelling Older Adults: Findings From the Health ABC Study. *Ann Pharmacother* 2015;49(11):1214-21. doi: 10.1177/1060028015596998
8. Pariente A, Dartigues JF, Benichou J, et al. Benzodiazepines and injurious falls in community dwelling elders. *Drugs Aging* 2008;25(1):61-70.
9. O'Loughlin JL, Robitaille Y, Boivin JF, et al. Incidence of and risk factors for falls and injurious falls among the community-dwelling elderly. *Am J Epidemiol* 1993;137(3):342-54.
10. Muir SW, Gopaul K, Montero Odasso MM. The role of cognitive impairment in fall risk among older adults: a systematic review and meta-analysis. *Age Ageing* 2012;41(3):299-308. doi: 10.1093/ageing/afs012
11. Takazawa K, Arisawa K. Relationship between the type of urinary incontinence and falls among frail elderly women in Japan. *J Med Invest* 2005;52(3-4):165-71.

12. Nakagawa H, Niu K, Hozawa A, et al. Impact of nocturia on bone fracture and mortality in older individuals: a Japanese longitudinal cohort study. *J Urol* 2010;184(4):1413-8. doi: 10.1016/j.juro.2010.05.093 [published Online First: 2010/08/24]
13. Vaughan CP, Brown CJ, Goode PS, et al. The association of nocturia with incident falls in an elderly community-dwelling cohort. *Int J Clin Pract* 2010;64(5):577-83. doi: 10.1111/j.1742-1241.2009.02326.x
14. Dionyssiotis Y. Analyzing the problem of falls among older people. *International Journal of General Medicine* 2012;5:805-13. doi: 10.2147/IJGM.S32651
15. Wagner TH, Hu TW, Bentkover J, et al. Health-related consequences of overactive bladder. *Am J Manag Care* 2002;8(19 Suppl):S598-607.
16. Coyne KS, Wein A, Nicholson S, et al. Comorbidities and personal burden of urgency urinary incontinence: a systematic review. *Int J Clin Pract* 2013;67(10):1015-33. doi: 10.1111/ijcp.12164
17. Jayadevappa R, Chhatre S, Newman DK, et al. Association between overactive bladder treatment and falls among older adults. *Neurourol Urodyn* 2018;37(8):2688-94. doi: 10.1002/nau.23719
18. Dumoulin C, Hay-Smith J. Pelvic floor muscle training versus no treatment for urinary incontinence in women. A Cochrane systematic review. *Eur J Phys Rehabil Med* 2008;44(1):47-63.
19. Gormley EA, Lightner DJ, Faraday M, et al. Diagnosis and treatment of overactive bladder (non-neurogenic) in adults: AUA/SUFU guideline amendment. *The Journal of urology* 2015;193(5):1572-80.
20. Gomes T, Juurlink DN, Ho JMW, et al. Risk of serious falls associated with oxybutynin and tolterodine: A population based study. *Journal of Urology* 2011;186(4):1340-44. doi: <http://dx.doi.org/10.1016/j.juro.2011.05.077>
21. Szabo SM, Gooch KL, Walker DR, et al. The Association Between Overactive Bladder and Falls and Fractures: A Systematic Review. *Adv Ther* 2018;35(11):1831-41. doi: 10.1007/s12325-018-0796-8

- 1  
2  
3  
4 22. The risk of falls and fractures among those with overactive bladder (OAB): A systematic  
5 review. ISPOR European Meeting 2016; Vienna, Austria.  
6
- 7 23. Zinner NR, Mattiasson A, Stanton SL. Efficacy, safety, and tolerability of extended-release  
8 once-daily tolterodine treatment for overactive bladder in older versus younger patients.  
9 *J Am Geriatr Soc* 2002;50(5):799-807.  
10
- 11 24. Dubeau CE, Kraus SR, Griebing TL, et al. Effect of fesoterodine in vulnerable elderly  
12 subjects with urgency incontinence: a double-blind, placebo controlled trial. *J Urol*  
13 2014;191(2):395-404. doi: 10.1016/j.juro.2013.08.027  
14
- 15 25. Batista JE, Kolbl H, Herschorn S, et al. The efficacy and safety of mirabegron compared  
16 with solifenacin in overactive bladder patients dissatisfied with previous antimuscarinic  
17 treatment due to lack of efficacy: results of a noninferiority, randomized, phase IIIb trial.  
18 *Ther Adv Urol* 2015;7(4):167-79. doi: 10.1177/1756287215589250  
19
- 20 26. Onukwugha E, Zuckerman IH, McNally D, et al. The total economic burden of overactive  
21 bladder in the United States: a disease-specific approach. *Am J Manag Care* 2009;15(4  
22 Suppl):S90-7.  
23
- 24 27. Hausdorff JM. Gait variability: methods, modeling and meaning. *J Neuroeng Rehabil*  
25 2005;2:19. doi: 10.1186/1743-0003-2-19  
26
- 27 28. Darkow T, Fontes CL, Williamson TE. Costs associated with the management of overactive  
28 bladder and related comorbidities. *Pharmacotherapy* 2005;25(4):511-9.  
29
- 30 29. IBM Watson Health. MarketScan Databases 2018 [Available from:  
31 <http://truvenhealth.com/markets/life-sciences/products/data-tools/marketscan-databases>.  
32
- 33 30. Wu JM, Matthews CA, Conover MM, et al. Lifetime Risk of Stress Incontinence or Pelvic  
34 Organ Prolapse Surgery. *Obstetrics and gynecology* 2014;123(6):1201-06. doi:  
35 10.1097/AOG.0000000000000286  
36
- 37 31. Marsico M, Mehta V, Chastek B, et al. Estimating the incidence and prevalence of juvenile-  
38 onset recurrent respiratory papillomatosis in publicly and privately insured claims  
39 databases in the United States. *Sexually transmitted diseases* 2014;41(5):300-05.  
40
- 41  
42  
43  
44  
45  
46  
47  
48  
49  
50  
51  
52  
53  
54  
55  
56  
57  
58  
59  
60

- 1  
2  
3  
4 32. Gauthier G, Guérin A, Zhdanova M, et al. Treatment patterns, healthcare resource  
5 utilization, and costs following first-line antidepressant treatment in major depressive  
6 disorder: a retrospective US claims database analysis. *BMC Psychiatry* 2017;17:222.  
7 doi: 10.1186/s12888-017-1385-0  
8  
9
- 10 33. Rothman KJ, Greenland S, Lash TL. Modern epidemiology. 3rd ed. Philadelphia: Wolters  
11 Kluwer Health/Lippincott Williams & Wilkins 2008.  
12  
13
- 14 34. Durden E, Walker D, Gray S, et al. The Direct and Indirect Costs Associated With  
15 Overactive Bladder Within a Commercially-Insured Population in the United States. *J*  
16 *Occup Environ Med* 2018 doi: 10.1097/JOM.0000000000001367  
17  
18
- 19 35. Richardson K, Bennett K, Maidment ID, et al. Use of Medications with Anticholinergic  
20 Activity and Self-Reported Injurious Falls in Older Community-Dwelling Adults. *J Am*  
21 *Geriatr Soc* 2015;63(8):1561-9. doi: 10.1111/jgs.13543  
22  
23
- 24 36. Boustani M, Campbell N, Munger S, et al. Impact of anticholinergics on the aging brain: a  
25 review and practical application. 2008  
26  
27
- 28 37. Salahudeen MS, Duffull SB, Nishtala PS. Anticholinergic burden quantified by  
29 anticholinergic risk scales and adverse outcomes in older people: a systematic review.  
30 *BMC Geriatr* 2015;15:31. doi: 10.1186/s12877-015-0029-9  
31  
32
- 33 38. Assessment of anticholinergic burden scales and measures for estimating anticholinergic  
34 exposure in retrospective US database analyses. ISPOR 22nd Annual International  
35 Meeting; 2018; Baltimore, MD.  
36  
37
- 38 39. WHO Collaborating Centre for Drug Statistics Methodology. ATC/DDD Index 2017  
39 [Available from: [http://www.whocc.no/atc\\_ddd\\_index/](http://www.whocc.no/atc_ddd_index/).  
40  
41
- 42 40. WHO Collaborating Centre for Drug Statistics Methodology. Definition and general  
43 considerations [Available from:  
44 [https://www.whocc.no/ddd/definition\\_and\\_general\\_considera/](https://www.whocc.no/ddd/definition_and_general_considera/).  
45  
46
- 47 41. Gray SL, Anderson ML, Dublin S, et al. Cumulative use of strong anticholinergics and  
48 incident dementia: A prospective cohort study. *JAMA Internal Medicine* 2015;175(3):401-  
49 07. doi: 10.1001/jamainternmed.2014.7663  
50  
51  
52  
53  
54  
55  
56  
57  
58  
59  
60

- 1  
2  
3  
4 42. Elixhauser A, Steiner C, Harris DR, et al. Comorbidity measures for use with administrative  
5 data. *Medical care* 1998;36(1):8-27.  
6
- 7 43. Vonesh E. Generalized Linear and Nonlinear Models for Correlated Data: Theory and  
8 Applications Using SAS. Cary, NC: SAS Institute Inc. 2012.  
9
- 10 44. Hernan MA, Brumback B, Robins JM. Marginal structural models to estimate the causal  
11 effect of zidovudine on the survival of HIV-positive men. *Epidemiology* 2000;11(5):561-  
12 70.  
13
- 14 45. Robins JM, Hernan MA, Brumback B. Marginal structural models and causal inference in  
15 epidemiology. *Epidemiology* 2000;11(5):550-60.  
16
- 17 46. Collamati A, Martone AM, Poscia A, et al. Anticholinergic drugs and negative outcomes in  
18 the older population: from biological plausibility to clinical evidence. *Aging clinical and*  
19 *experimental research* 2016;28(1):25-35. doi: 10.1007/s40520-015-0359-7 [published  
20 Online First: 2015/05/02]  
21
- 22 47. Rothman KG. Modern Epidemiology 2012.  
23
- 24 48. Yehoshua A, Chancellor M, Vasavada S, et al. Health Resource Utilization and Cost for  
25 Patients with Incontinent Overactive Bladder Treated with Anticholinergics. *Journal of*  
26 *managed care & specialty pharmacy* 2016;22(4):406-13. doi:  
27 10.18553/jmcp.2016.22.4.406  
28
- 29 49. Kao LT, Huang CY, Lin HC, et al. No Increased Risk of Fracture in Patients Receiving  
30 Antimuscarinics for Overactive Bladder Syndrome: A Retrospective Cohort Study. *J Clin*  
31 *Pharmacol* 2018 doi: 10.1002/jcph.1067  
32
- 33 50. Chatterjee S, Bali V, Carnahan RM, et al. Anticholinergic medication use and risk of fracture  
34 in elderly adults with depression. *JAGS* 2016;64:1492-7.  
35
- 36 51. MacDiarmid SA. Maximizing the Treatment of Overactive Bladder in the Elderly. *Reviews in*  
37 *Urology* 2008;10(1):6-13.  
38
- 39 52. Talasz H, Lechleitner M. Polypharmacy and incontinence. *Zeitschrift für Gerontologie und*  
40 *Geriatric* 2012;45(6):464-67.  
41  
42  
43  
44  
45  
46  
47  
48  
49  
50  
51  
52  
53  
54  
55  
56  
57  
58  
59  
60

1  
2  
3 53. Maman K, Aballea S, Nazir J, et al. Comparative efficacy and safety of medical treatments  
4 for the management of overactive bladder: a systematic literature review and mixed  
5 treatment comparison. *Eur Urol* 2014;65(4):755-65. doi: 10.1016/j.eururo.2013.11.010  
6  
7  
8  
9  
10  
11  
12  
13  
14  
15  
16  
17  
18  
19  
20  
21  
22  
23  
24  
25  
26  
27  
28  
29  
30  
31  
32  
33  
34  
35  
36  
37  
38  
39  
40  
41  
42  
43  
44  
45  
46  
47  
48  
49  
50  
51  
52  
53  
54  
55  
56  
57  
58  
59  
60

For peer review only

## FIGURE LEGENDS

**Figure 1:** Mean (95%CI) level of anticholinergic burden according to time since cohort entry, and age

**Footnotes:** CI: confidence interval; ACB: anticholinergic burden

**Figure 2** Rates (top), and rate ratios (bottom), for falls and fractures\* estimated over the study period among the OAB cohort, according to baseline anticholinergic burden,\*\* overall and according to age (<65 years vs. >65 years); Truven MarketScan databases 2007-2015

**Footnotes:** ACB: anticholinergic burden  
\*Point estimates (dots) and 95% confidence intervals (lines) plotted  
\*\*Baseline anticholinergic burden assessed over the 12 month pre-index period

**Supplementary Figure 1:** Example trajectory and calculation of cumulative anticholinergic burden over time

**Supplementary Figure 2:** Weights used in a marginal structural model for the association between falls and fractures and anticholinergic burden among the OAB cohort (N=154,432), Truven MarketScan databases 2007-2015

**Footnotes:** ACB: anticholinergic burden

**Supplementary Figure 3:** Weights used in a marginal structural model for the association between falls and fractures and anticholinergic burden, adjusted for important confounders and OAB status (N = 130,449), Truven MarketScan databases 2007-2015

**Footnotes:** ACB: anticholinergic burden



1  
2  
3  
4  
5  
6  
7  
8  
9  
10  
11  
12  
13  
14  
15  
16  
17  
18  
19  
20  
21  
22  
23  
24  
25  
26  
27  
28  
29  
30  
31  
32  
33  
34  
35  
36  
37  
38  
39  
40  
41  
42  
43  
44  
45  
46  
47  
48  
49  
50  
51  
52  
53  
54  
55  
56  
57  
58  
59  
60

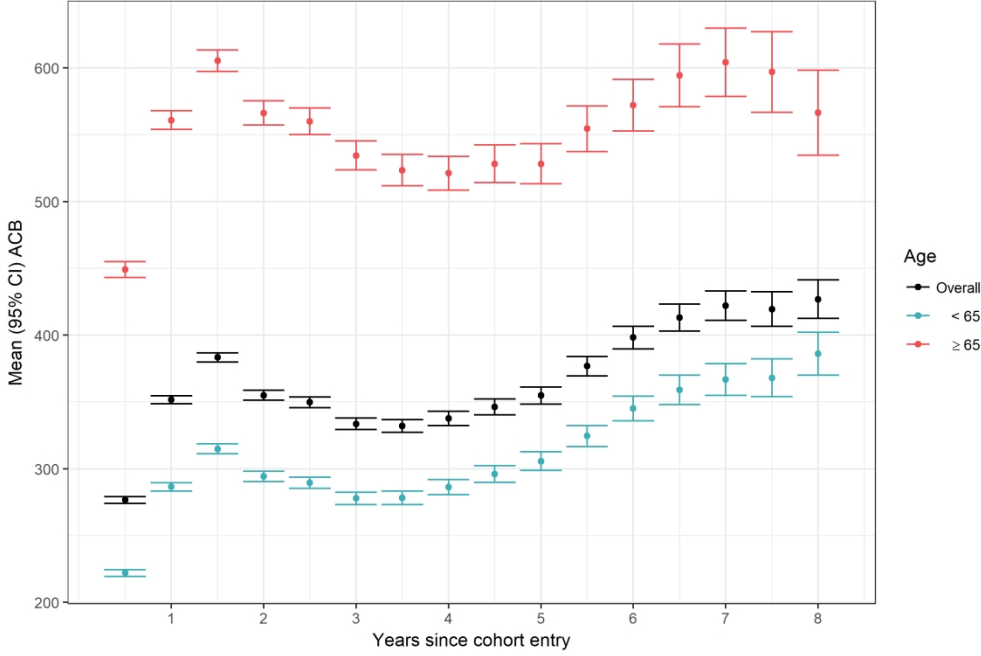

Figure 1: Mean (95% CI) level of anticholinergic burden post-index, according to time since cohort entry, and age  
Footnote: CI: confidence interval; ACB: anticholinergic burden



Figure 2: Rates (top), and rate ratios (bottom), for falls and fractures\* estimated over the study period among the OAB cohort, according to baseline anticholinergic burden,\*\* overall and according to age (<65 years vs. >65 years); Truven MarketScan databases 2007-2015

Footnote: ACB: anticholinergic burden

\*Point estimates (dots) and 95% confidence intervals (lines) plotted

\*\*Baseline anticholinergic burden assessed over the 12 month pre-index period

169x143mm (300 x 300 DPI)

## Supplementary Figure 1: Example trajectory and calculation of cumulative anticholinergic burden over time

Steps to estimate cumulative anticholinergic exposure are:

- 1) determine the defined daily dose (DDD) of all medications considered by the ACB scale;
- 2) calculate the standardized daily dose (SDD) of the medication for each anticholinergic dispensing, as follows:
 
$$\text{SDD} = [\text{Number of daily doses} \times \text{Unit dose}] / \text{DDD};$$
- 3) multiply the SDD by the ACB scale score of the medication dispensed to yield a drug and patient-specific measure of standardized daily anticholinergic exposure (SDACE);
- 4) add drug-specific SDACE at the patient level to account for coverage with multiple medications on a given day, to give a summated standardized daily anticholinergic exposure (SumSDACE);
- 5) calculate cumulative burden by summing SumSDACE for all days during the exposure period.

### Drug 1:

ACB score 2, prescribed at 1.5 x defined daily dose  
→ Adjusted score = 2 x 1.5 = 3

### Drug 2:

ACB score 1, prescribed at defined daily dose  
→ Adjusted score = 1 x 1 = 1

Example trajectory and calculation:

|                                 | Day 1: initiate drug 1 |   |   |    | Day 5: initiate drug 2, continue drug 1 |           |           |           | Day 9: Discontinue drugs |
|---------------------------------|------------------------|---|---|----|-----------------------------------------|-----------|-----------|-----------|--------------------------|
| Day                             | 1                      | 2 | 3 | 4  | 5                                       | 6         | 7         | 8         | 9                        |
| Drug 1<br>(Adjusted score = 3)  | X                      | X | X | X  | X                                       | X         | X         | X         |                          |
| Drug 2<br>(Adjusted score = 1)  |                        |   |   |    | X                                       | X         | X         | X         |                          |
| SumSDACE                        | 3                      | 3 | 3 | 3  | 3 + 1 = 4                               | 3 + 1 = 4 | 3 + 1 = 4 | 3 + 1 = 4 | 0                        |
| CumSDACE<br>(Summed daily dose) | 3                      | 6 | 9 | 12 | 16                                      | 20        | 24        | 28        | 28                       |

For peer review only - <http://bmjopen.bmj.com/site/about/guidelines.xhtml>

**Supplementary Table 1: CPT, NDC, ICD-9 and HCPCS codes to identify OAB, comorbidities and risk factors, and study outcomes**

| Definition                                                                                                                                                                                                                                                                                                                                                                                                                                                                                                                                                                                                                                                                                                                                                                                                                                                                                                                                                                                                                                                                                                                                                                                                                                                                                                                                                                            | References                                                                                                                                                                                                                                                                                                                                                                                                                                                                                                                                                                                                                                                                                                                     |
|---------------------------------------------------------------------------------------------------------------------------------------------------------------------------------------------------------------------------------------------------------------------------------------------------------------------------------------------------------------------------------------------------------------------------------------------------------------------------------------------------------------------------------------------------------------------------------------------------------------------------------------------------------------------------------------------------------------------------------------------------------------------------------------------------------------------------------------------------------------------------------------------------------------------------------------------------------------------------------------------------------------------------------------------------------------------------------------------------------------------------------------------------------------------------------------------------------------------------------------------------------------------------------------------------------------------------------------------------------------------------------------|--------------------------------------------------------------------------------------------------------------------------------------------------------------------------------------------------------------------------------------------------------------------------------------------------------------------------------------------------------------------------------------------------------------------------------------------------------------------------------------------------------------------------------------------------------------------------------------------------------------------------------------------------------------------------------------------------------------------------------|
| <b>Identify OAB</b>                                                                                                                                                                                                                                                                                                                                                                                                                                                                                                                                                                                                                                                                                                                                                                                                                                                                                                                                                                                                                                                                                                                                                                                                                                                                                                                                                                   |                                                                                                                                                                                                                                                                                                                                                                                                                                                                                                                                                                                                                                                                                                                                |
| <b>By diagnosis code</b>                                                                                                                                                                                                                                                                                                                                                                                                                                                                                                                                                                                                                                                                                                                                                                                                                                                                                                                                                                                                                                                                                                                                                                                                                                                                                                                                                              |                                                                                                                                                                                                                                                                                                                                                                                                                                                                                                                                                                                                                                                                                                                                |
| Other functional disorders of bladder (ICD9: 596.5),<br>Hypertonicity of the bladder (ICD9: 596.51)<br>Urinary incontinence unspecified (ICD9: 788.3)<br>Urge incontinence (ICD9: 788.31)<br>Mixed incontinence (ICD9: 788.33)<br>Urinary frequency (ICD9: 788.41)<br>Nocturia (ICD9: 788.43)<br>Urgency of urination (ICD9: 788.63)<br>Functional urinary incontinence (ICD9: 788.91)                                                                                                                                                                                                                                                                                                                                                                                                                                                                                                                                                                                                                                                                                                                                                                                                                                                                                                                                                                                                | Chancellor MB, Migliaccio-Walle K, Bramley TJ, et al. Long-term patterns of use and treatment failure with anticholinergic agents for overactive bladder. Clin Ther. 2013;35(11):1744-1751.<br>Pelletier EM, Vats V, Clemens JQ. Pharmacotherapy adherence and costs versus nonpharmacologic management in overactive bladder. Am J Manag Care. 2009;15(4 Suppl):S108-114.<br>Scheife R, Takeda M. Central nervous system safety of anticholinergic drugs for the treatment of overactive bladder in the elderly. Clinical Therapeutics. 2005;27(2):144-153.<br>Yeaw J, Benner JS, Walt JG, Sian S, Smith DB. Comparing adherence and persistence across 6 chronic medication classes. J Manag Care Pharm. 2009;15(9):728-740. |
| <b>By drug code</b>                                                                                                                                                                                                                                                                                                                                                                                                                                                                                                                                                                                                                                                                                                                                                                                                                                                                                                                                                                                                                                                                                                                                                                                                                                                                                                                                                                   |                                                                                                                                                                                                                                                                                                                                                                                                                                                                                                                                                                                                                                                                                                                                |
| Darifenacin (NDC: 0430-0170, 0430-0171, 0591-4375, 0591-4380, 10370-170, 10370-171, 13668-202, 13668-203, 35356-272, 42291-206, 42291-207, 54868-5363, 54868-5704, 59746-516, 59746-517, 65862-861, 65862-862, 69097-431, 69097-432)                                                                                                                                                                                                                                                                                                                                                                                                                                                                                                                                                                                                                                                                                                                                                                                                                                                                                                                                                                                                                                                                                                                                                  | FDA-US Food and Drug administration. National Drug Code Directory. <a href="https://www.fda.gov/Drugs/InformationOnDrugs/ucm142438.htm">https://www.fda.gov/Drugs/InformationOnDrugs/ucm142438.htm</a>                                                                                                                                                                                                                                                                                                                                                                                                                                                                                                                         |
| Fesoterodine (NDC: 0069-0242, 0069-0244, 54868-6156, 54868-6175, 55154-2737, 55154-2738, 63539-183, 63539-242, 69189-0242, 69189-0244)                                                                                                                                                                                                                                                                                                                                                                                                                                                                                                                                                                                                                                                                                                                                                                                                                                                                                                                                                                                                                                                                                                                                                                                                                                                |                                                                                                                                                                                                                                                                                                                                                                                                                                                                                                                                                                                                                                                                                                                                |
| Flavoxate (NDC: 0574-0115,24658-720,42806-058,50268-324,51224-154,54868-6326,60429-290,68151-3826)                                                                                                                                                                                                                                                                                                                                                                                                                                                                                                                                                                                                                                                                                                                                                                                                                                                                                                                                                                                                                                                                                                                                                                                                                                                                                    |                                                                                                                                                                                                                                                                                                                                                                                                                                                                                                                                                                                                                                                                                                                                |
| Oxybutynin (NDC: 0023-5812, 0023-5861, 0093-5206, 0093-5207, 0093-5208, 0121-0671, 0179-0187, 0378-6015, 0378-6605, 0378-6610, 0378-6615, 0603-1491, 0603-4975, 0615-3512, 0615-7519, 0615-7520, 0615-7521, 0832-0038, 0904-2821, 0904-6570, 10135-609, 10135-610, 10135-611, 10147-0761, 10147-0771, 10147-0781, 10544-518, 10544-559, 11523-4311, 11523-4322, 16729-317, 16729-318, 16729-319, 17856-1491, 21695-406, 33261-342, 35356-909, 35356-958, 35356-991, 42291-633, 42291-634, 42291-635, 43063-145, 43353-367, 43353-769, 43353-978, 50090-0317, 50090-0318, 50090-2049, 50111-456, 50268-627, 50268-628, 50268-629, 50436-4777, 50458-805, 50458-810, 50458-815, 51079-722, 51079-723, 52544-041, 52544-084, 52544-166, 52544-920, 53808-0618, 53808-0747, 53808-0873, 54569-1990, 54838-510, 54868-2157, 54868-4502, 54868-4835, 54868-5728, 54868-5742, 54868-5743, 54868-6171, 55154-0657, 55154-5537, 55154-6298, 55154-6647, 55154-7225, 60432-092, 60760-980, 61786-605, 62175-270, 62175-271, 62175-272, 63187-749, 63629-1354, 63629-5484, 63629-6355, 63629-6434, 63739-548, 64980-209, 64980-210, 64980-211, 65162-371, 65162-372, 65162-373, 66336-604, 67296-1175, 68071-1875, 68071-2013, 68084-400, 68084-480, 68084-610, 68151-3646, 68788-6402, 69189-0581, 69189-5206, 69189-6605, 69189-6610, 70518-0158, 70518-0202, 76237-216, 76237-217, 76237-218) |                                                                                                                                                                                                                                                                                                                                                                                                                                                                                                                                                                                                                                                                                                                                |
| Solifenacin (NDC: 50090-0972, 51248-150, 51248-151, 54569-5790, 54868-4705, 54868-5398, 55154-3875, 55154-3876, 55154-3877, 55154-3878)                                                                                                                                                                                                                                                                                                                                                                                                                                                                                                                                                                                                                                                                                                                                                                                                                                                                                                                                                                                                                                                                                                                                                                                                                                               |                                                                                                                                                                                                                                                                                                                                                                                                                                                                                                                                                                                                                                                                                                                                |
| Tolterodine (NDC: 0009-4541, 0009-4544, 0009-5190, 0009-5191, 0093-0010, 0093-0018, 0093-2049, 0093-2050, 0093-2055, 0093-2056, 0093-7163, 0093-7164, 0378-3402, 0378-3404, 0378-5445, 0378-5446, 0904-6592, 0904-6593, 13668-189, 13668-190, 16590-959, 33342-097, 33342-098, 35356-417, 51079-197, 51079-198, 51079-235, 54868-4514, 54868-5126, 55154-3933, 55154-3935, 55289-132, 59762-0047, 59762-0048, 59762-0170, 59762-0800, 60429-825, 60429-826, 60505-3527, 60505-3528, 63629-5625, 68151-2049, 68151-4281, 69189-3404, 69189-5190)                                                                                                                                                                                                                                                                                                                                                                                                                                                                                                                                                                                                                                                                                                                                                                                                                                       |                                                                                                                                                                                                                                                                                                                                                                                                                                                                                                                                                                                                                                                                                                                                |
| Trospium (NDC: 0574-0118, 0574-0145, 0591-3636, 23155-530, 42291-846, 60429-098, 60429-103, 60505-3454, 68001-228, 68462-461, 69097-912)                                                                                                                                                                                                                                                                                                                                                                                                                                                                                                                                                                                                                                                                                                                                                                                                                                                                                                                                                                                                                                                                                                                                                                                                                                              |                                                                                                                                                                                                                                                                                                                                                                                                                                                                                                                                                                                                                                                                                                                                |
| Mirabegron/Myrbetriq (NDC: 00469-2601, 00469-2602)<br>OnabotulinumtoxinA/Botox (CPT: 52287)                                                                                                                                                                                                                                                                                                                                                                                                                                                                                                                                                                                                                                                                                                                                                                                                                                                                                                                                                                                                                                                                                                                                                                                                                                                                                           |                                                                                                                                                                                                                                                                                                                                                                                                                                                                                                                                                                                                                                                                                                                                |
| <b>Outcomes</b>                                                                                                                                                                                                                                                                                                                                                                                                                                                                                                                                                                                                                                                                                                                                                                                                                                                                                                                                                                                                                                                                                                                                                                                                                                                                                                                                                                       |                                                                                                                                                                                                                                                                                                                                                                                                                                                                                                                                                                                                                                                                                                                                |
| Fall (ICD9: E880-E886, E888, E998.0, E888.1, E888.8, E888.9)<br>Fracture (ICD9: 733.1,* 733.93-733.98,* 800.x-829.x, E887; ICD9: 79.0-79.6; CPT: 21800, 21805, 21810, 21820, 21825, 22305,22310, 22318, 22319, 22520, 22521, 22523, 22524, 23500, 23505, 23515, 23570, 23575, 23585, 23600, 23605, 23615, 23616, 23620, 23625, 23630, 23665, 23670, 23675, 23680, 24500, 24505, 24515, 24516, 24530, 24535, 24538, 24545, 24546, 24560, 24565,                                                                                                                                                                                                                                                                                                                                                                                                                                                                                                                                                                                                                                                                                                                                                                                                                                                                                                                                        | Afroz PN, Bykowski MR, James IB, et al. The Epidemiology of Mandibular Fractures in the United States, Part 1: A Review of 13,142 Cases from the US National Trauma Data Bank. Journal of oral and maxillofacial surgery. 2015;73(12):2361.<br>Beydoun HA, Beydoun MA, Mishra NK, et al. Comorbid Parkinson's disease, falls and fractures in the 2010 National Emergency Department Sample. Parkinsonism & Related Disorders. 2017;35:30-35.                                                                                                                                                                                                                                                                                  |

24566, 24575, 24576, 24577, 24579, 24582, 24620, 24635, 24650, 24655, 24665, 24666, 24670, 24675, 24685, 25500, 25505, 25515, 25520, 25525, 25526, 25530, 25535, 25545, 25560, 25565, 25574, 25575, 25600, 25605, 25606, 25607, 25608, 25609, 25622, 25624, 25628, 25630, 25635, 25645, 25650, 25651, 25652, 25680, 25685, 26600, 26605, 26607, 26608, 26615, 27193, 27194, 27200, 27202, 27215, 27216, 27217, 27218, 27220, 27222, 27226, 27227, 27228, 27230, 27232, 27235, 27236, 27238, 27240, 27244, 27245, 27246, 27248, 27254, 27267, 27268, 27269, 27500, 27501, 27502, 27503, 27506, 27507, 27508, 27509, 27510, 27511, 27513, 27514, 27520, 27524, 27530, 27532, 27535, 27536, 27538, 27540, 27750, 27752, 27756, 27758, 27759, 27760, 27762, 27766, 27767, 27768, 27769, 27780, 27781, 27784, 27786, 27788, 27792, 27808, 27810, 27814, 27816, 27818, 27822, 27823, 27824, 27825, 27826, 27827, 27828, 28400, 28405, 28406, 28415, 28420, 28430, 28435, 28436, 28445, 28450, 28455, 28456, 28465, 28470, 28475, 28476, 28485, 29850, 29851, 29855, 29856; HCPCS: S2360)

Clavijo-Alvarez JA, Deleyiannis FWB, Peitzman AB, Zenati MS. Risk factors for death in elderly patients with facial fractures secondary to falls. *The Journal of craniofacial surgery*. 2012;23(2):494-498.

Crispo JA, Willis AV, Thibault DP, et al. Associations between Anticholinergic Burden and Adverse Health Outcomes in Parkinson Disease. *PLoS one*. 2016;11(3):e0150621.

Curtis JR, Mudano AS, Solomon DH, et al. Identification and validation of vertebral compression fractures using administrative claims data. *Medical care*. 2009;47(1):69.

Darkow T, Fontes CL, Williamson TE. Costs associated with the management of overactive bladder and related comorbidities. *Pharmacotherapy*. 2005;25(4):511-519.

Ganz DA, Kim SB, Zingmond DS, et al. Effect of a Falls Quality Improvement Program on Serious Fall-Related Injuries. *Journal of the American Geriatrics Society*. 2015;63(1):63-70.

Kachroo S, Kawabata H, Colilla S, et al. Association between hypoglycemia and fall-related events in type 2 diabetes mellitus: analysis of a US commercial database. *Journal of managed care & specialty pharmacy*. 2015;21(3):243-253.

Kalilani L, Asgharnejad M, Palokangas T, Durgin T. Comparing the Incidence of Falls/Fractures in Parkinson's Disease Patients in the US Population. *PLoS one*. 2016;11(9):e0161689.

Kamal-Bahl SJ, Stuart BC, Beers MH. Propoxyphene use and risk for hip fractures in older adults. *The American journal of geriatric pharmacotherapy*. 2006;4(3):219-226.

Kruschinski C, Sheehy O, Hummers-Pradier E, Leloir J. Fracture risk of patients suffering from dizziness: A retrospective cohort study. *European Journal of General Practice*. 2010;16(4):229-235.

Lapane KL, Jesdale BM, Dubé CE, et al. Sulfonylureas and risk of falls and fractures among nursing home residents with type 2 diabetes mellitus. *Diabetes research and clinical practice*. 2015;109(2):411.

Miller M, Stürmer T, Azrael D, et al. Opioid analgesics and the risk of fractures in older adults with arthritis. *Journal of the American Geriatrics Society*. 2011;59(3):430-438.

Pan H-H, Li C-Y, Chen T-J, Su T-P, Wang K-Y. Association of polypharmacy with fall-related fractures in older Taiwanese people: age-and gender-specific analyses. *BMJ open*. 2014;4(3):e004428.

Roudsari BS, Ebel BE, Corso PS, et al. The acute medical care costs of fall-related injuries among the US older adults. *Injury*. 2005;36(11):1316-1322.

Schiff. Pregnancy outcomes following hospitalisation for a fall in Washington State from 1987 to 2004. *BJOG: An International Journal of Obstetrics & Gynaecology*. 2008;115(13):1648-1654.

Shah M, Chaudhari S, McLaughlin TP, et al. Cumulative burden of oral corticosteroid adverse effects and the economic implications of corticosteroid use in patients with systemic lupus erythematosus. *Clinical therapeutics*. 2013;35(4):486.

Stevens JA, Powell KE, Smith SM, et al. Physical activity, functional limitations, and the risk of fall-related fractures in community-dwelling elderly. *Annals of epidemiology*. 1997;7(1):54-61.

Verma SK, Sorock GS, Pransky GS, Courtney TK, Smith GS. Occupational physical demands and same-level falls resulting in fracture in female workers: an analysis of workers' compensation claims. *Injury prevention*. 2007;13(1):32-36.

Wolinsky FD, Bentler SE, Liu L, et al. Recent hospitalization and the risk of hip fracture among older Americans. *The Journals of Gerontology Series A: Biological Sciences and Medical Sciences*. 2009;64(2):249-255.

## Comorbidities and falls/fractures risk factors

### CV diseases

Hypertension, uncomplicated (ICD9: 401.x)

Cerebrovascular disease and Stroke (ICD9: 430.x-438.x)

Hypertension, complicated (ICD9: 402.x-405)

Hypotension (ICD9: 796.3)

### Musculoskeletal problems

Arthritis (ICD9: 446.x, 701.0, 710.0-710.4, 710.8, 710.9, 711.2, 714.x, 719.3, 720.x, 725.x, 728.5, 728.89, 729.30)

Musculoskeletal problems (ICD9: 306.0, 723.9, 729.89)

Bynum JP, Rabins PV, Weller W, et al. The relationship between a dementia diagnosis, chronic illness, Medicare expenditures, and hospital use. *Journal of the American Geriatrics Society*. 2004;52(2):187-194.

Centers for Medicare & Medicaid Services. ICD-9-CM Diagnosis and Procedure Codes: Abbreviated and Full Code Titles. <https://www.cms.gov/medicare/coding/ICD9providerdiagnosticcodes/codes.html>. Accessed November 07 2016.

Forbes WF, McLachlan DR. Further thoughts on the aluminum-Alzheimer's disease link. *Journal of Epidemiology and Community Health*. 1996;50(4):401-403.

Goldstein LB. Accuracy of ICD-9-CM coding for the identification of patients with acute ischemic stroke: effect of modifier codes. *Stroke; a journal of cerebral circulation*. 1998;29(8):1602-1604.

Osteoporosis (ICD9: 733.0x)

### Neurologic impairments

Palmomental reflex (ICD9: 796.1)

Parkinson's disease and other neurologic impairments (ICD9: 332.x, 331.9, 333.4, 333.5, 333.92, 334.x-335.x, 336.2, 340.x, 341.x, 345.x, 348.1, 348.3, 780.3, 784.3)

Dementia (ICD9: 290.x, 294.1, 331.2)

Depression, neurotic disorders, or psychosis (ICD9: 293.8, 295-299, 300-309, 311, E937.x)

Alzheimer's disease (ICD9: 331.0)

Cognitive impairment (ICD9: 331.x)

Dizziness (ICD9: 780.4)

Syncope/fainting (ICD9: 780.2)

### Endocrine, nutritional and metabolic diseases

Diabetes mellitus and diabetic peripheral neuropathy (ICD9: 250.x, 357.2)

Hyperparathyroidism (ICD9: 252.0x, 588.81)

### Other

COPD (ICD9: 490.x, 491.x, 492.x, 494.x, 496.x)

Chronic kidney disease (ICD9: 403.x, 585.x)

Internal motility disorders (ICD9: 564.89)

Decreased vision (ICD9: 369.x)

Prior (serious) falls or fractures within the preceding year **Various:** (see outcomes listed above)

Leg and foot amputation (ICD9: 896.x, 897.x)

### Lifestyle choices

Smoking (by proxy codes, and COPD (see below) (ICD9: 649.0x, 305.1x, V15.82)

Alcohol abuse (ICD9: 265.2, 291.1-291.3, 291.5-291.9, 303.0, 303.9, 305.0, 357.5, 425.5, 535.3, 571.0-571.3, 980.x, V11.3)

### Medications

Opioids (NDC: codes for Opioids [full list available upon request])

Benzodiazepines (NDC: codes for Benzodiazepines [full list available upon request])

CPT: 1034F, 4000F, 4001F, 99406, 99407

HCPCS: D1320, G8402, G8403, G8453, G8454, G8455

Chronic use of inhaled or oral corticosteroids (NDC: codes for inhaled or oral corticosteroids [full list available upon request]) (Chronic was defined a days supply of  $\geq 90$  over one year)

Hammill BG, Curtis LH, Schulman KA, Whellan DJ. Relationship between cardiac rehabilitation and long-term risks of death and myocardial infarction among elderly Medicare beneficiaries. *Circulation*. 2010;121(1):63-70

Johnston S, Conner C, Aagren M, Ruiz K, Bouchard J. Association between hypoglycaemic events and fall-related fractures in Medicare-covered patients with type 2 diabetes. *Diabetes, Obesity and Metabolism*. 2012;14(7):634-643.

Muir SW, Gopaul K, Montero Odasso MM. The role of cognitive impairment in fall risk among older adults: a systematic review and meta-analysis. *Age Ageing*. 2012;41(3):299-308.

Mustard CA, Mayer T. Case-Control Study of Exposure to Medication and the Risk of Injurious Falls Requiring Hospitalization among Nursing Home Residents. *American Journal of Epidemiology*. 1997;145(8):738-745

Nakagawa H, Niu K, Hozawa A, et al. Impact of nocturia on bone fracture and mortality in older individuals: a Japanese longitudinal cohort study. *J Urol*. 2010;184(4):1413-1418\*

Nevitt MC, Cummings SR, Hudes ES. Risk factors for injurious falls: a prospective study. *J Gerontol*. 1991;46(5):M164-170

Pan H-H, Li C-Y, Chen T-J, Su T-P, Wang K-Y. Association of polypharmacy with fall-related fractures in older Taiwanese people: age-and gender-specific analyses. *BMJ open*. 2014;4(3):e004428.

Quan H, Sundararajan V, Halfon P, et al. Coding algorithms for defining comorbidities in ICD-9-CM and ICD-10 administrative data. *Medical care*. 2005;1130-1139.

Teng Z, Zhu Y, Wu F, et al. Opioids Contribute to Fracture Risk: A Meta-Analysis of 8 Cohort Studies: e0128232. *PLoS One*. 2015;10(6)

Tinetti ME, Speechley M, Ginter SF. Risk factors for falls among elderly persons living in the community. *New England journal of medicine*. 1988;319(26):1701-1707

Vaughan CP, Brown CJ, Goode PS, et al. The association of nocturia with incident falls in an elderly community-dwelling cohort. *Int J Clin Pract*. 2010;64(5):577-583.

NDC: National drug code; ICD-9: International Classification of Diseases (9th Edition); CPT: Common Procedural Code; HCPCS: Healthcare Common Procedure Coding System

\*Pathophysiologic fractures, stress fractures, and fracture due to motor vehicle accident were excluded in the base case analysis.



**Supplementary Table 2: Results from the (left) Cox model and (right) marginal structural model estimating the association between falls and fractures and anticholinergic burden, adjusted for important confounders and OAB status (N = 130,449)**

|                                                                    | Cox model results* |         | MSM results*   |         |
|--------------------------------------------------------------------|--------------------|---------|----------------|---------|
|                                                                    | HR (95%CI)         | p-value | HR (95%CI)     | p-value |
| <b>By anticholinergic burden level vs. no burden†</b>              |                    |         |                |         |
| Among those with OAB                                               |                    |         |                |         |
| Low (1 – 89)                                                       | 1.3 (1.2, 1.4)     | <0.001  | 1.3 (1.2, 1.5) | <0.001  |
| Medium (90 – 499)                                                  | 1.3 (1.2, 1.4)     | <0.001  | 1.4 (1.2, 1.5) | <0.001  |
| High (500+)                                                        | 1.4 (1.3, 1.5)     | <0.001  | 1.5 (1.3, 1.6) | <0.001  |
| Among those without OAB                                            |                    |         |                |         |
| Low (1 – 89)                                                       | 1.4 (1.3, 1.4)     | <0.001  | 1.3 (1.3, 1.4) | <0.001  |
| Medium (90 – 499)                                                  | 1.4 (1.3, 1.5)     | <0.001  | 1.4 (1.3, 1.5) | <0.001  |
| High (500+)                                                        | 1.7 (1.6, 1.8)     | <0.001  | 1.8 (1.6, 1.9) | <0.001  |
| <b>By age category vs. ≤45</b>                                     |                    |         |                |         |
| 46 to 55                                                           | 1.3 (1.2, 1.4)     | <0.001  | 1.3 (1.2, 1.4) | <0.001  |
| 56 to 65                                                           | 1.5 (1.4, 1.6)     | <0.001  | 1.5 (1.3, 1.6) | <0.001  |
| 66 to 75                                                           | 2.1 (2.0, 2.2)     | <0.001  | 2.0 (1.9, 2.2) | <0.001  |
| 76 to 85                                                           | 3.3 (3.1, 3.5)     | <0.001  | 3.2 (2.9, 3.5) | <0.001  |
| 86+                                                                | 4.6 (4.2, 5.0)     | <0.001  | 4.8 (4.1, 5.5) | <0.001  |
| <b>Sex</b>                                                         |                    |         |                |         |
| Female vs. male                                                    | 1.5 (1.5, 1.6)     | <0.001  | 1.5 (1.4, 1.6) | <0.001  |
| <b>Comorbidity categories at baseline</b>                          |                    |         |                |         |
| Cardiovascular diseases‡                                           | 1.1 (1.1, 1.2)     | <0.001  | 1.1 (1.0, 1.1) | 0.017   |
| Neurologic impairments                                             | 1.5 (1.4, 1.5)     | <0.001  | 1.4 (1.3, 1.5) | <0.001  |
| Endocrine, nutritional and metabolic disease                       | 1.2 (1.1, 1.3)     | <0.001  | 1.1 (1.0, 1.3) | 0.021   |
| Cardiovascular disease X Neurologic impairments                    | 1.0 (1.0, 1.1)     | 0.240   | 1.1 (1.0, 1.3) | 0.041   |
| Cardiovascular disease X Endocrine, nutritional, metabolic disease | 0.9 (0.8, 1.0)     | 0.102   | 1.0 (0.8, 1.1) | 0.715   |
| Neurologic impairments X Endocrine, nutritional, metabolic disease | 1.0 (0.9, 1.2)     | 0.432   | 1.1 (0.9, 1.3) | 0.491   |
| <b>No OAB vs. OAB at baseline</b>                                  |                    |         |                |         |
| Among those with no anticholinergic burden                         | 0.8 (0.8, 0.9)     | <0.001  | 0.8 (0.8, 0.9) | <0.001  |
| Among those with low anticholinergic burden                        | 0.9 (0.8, 0.9)     | <0.001  | 0.9 (0.8, 1.0) | 0.009   |
| Among those with medium anticholinergic burden                     | 0.8 (0.8, 0.9)     | <0.001  | 0.8 (0.8, 0.9) | <0.001  |
| Among those with high anticholinergic burden                       | 1.0 (0.9, 1.0)     | 0.511   | 1.0 (0.9, 1.1) | 0.908   |

CI: confidence interval; HR: hazard ratio; OAB: overactive bladder; MSM: marginal structural model.

\*The Cox model was implemented using function `coxph` from the R package `survival` version 2.41-3. The marginal structural model was implemented using function `coxph` from R package `survival` version 2.41-3, using the `weight` argument to apply time-varying weights, and setting a cluster term for enrolment id for robust variance estimation. Time-varying weights were calculated using function `ipwtm` from R package `ipw` version 1.0-11, and based on a multinomial logistic regression model (using a generalized logit link) with categorical time-varying anticholinergic burden as the outcome, where OAB at baseline, age, sex, and time-varying comorbidity categories as well as all two-way interactions between them were included as predictor variables.

†Level of anticholinergic burden assessed using the closest 6 month measure prior to the fall or fracture

‡Cardiovascular disease = cerebrovascular disease + stroke.

Supplementary Figure 2: Weights used in a marginal structural model for the association between falls and fractures and anticholinergic burden among the OAB cohort (N=154,432), Truven MarketScan databases 2007-2015

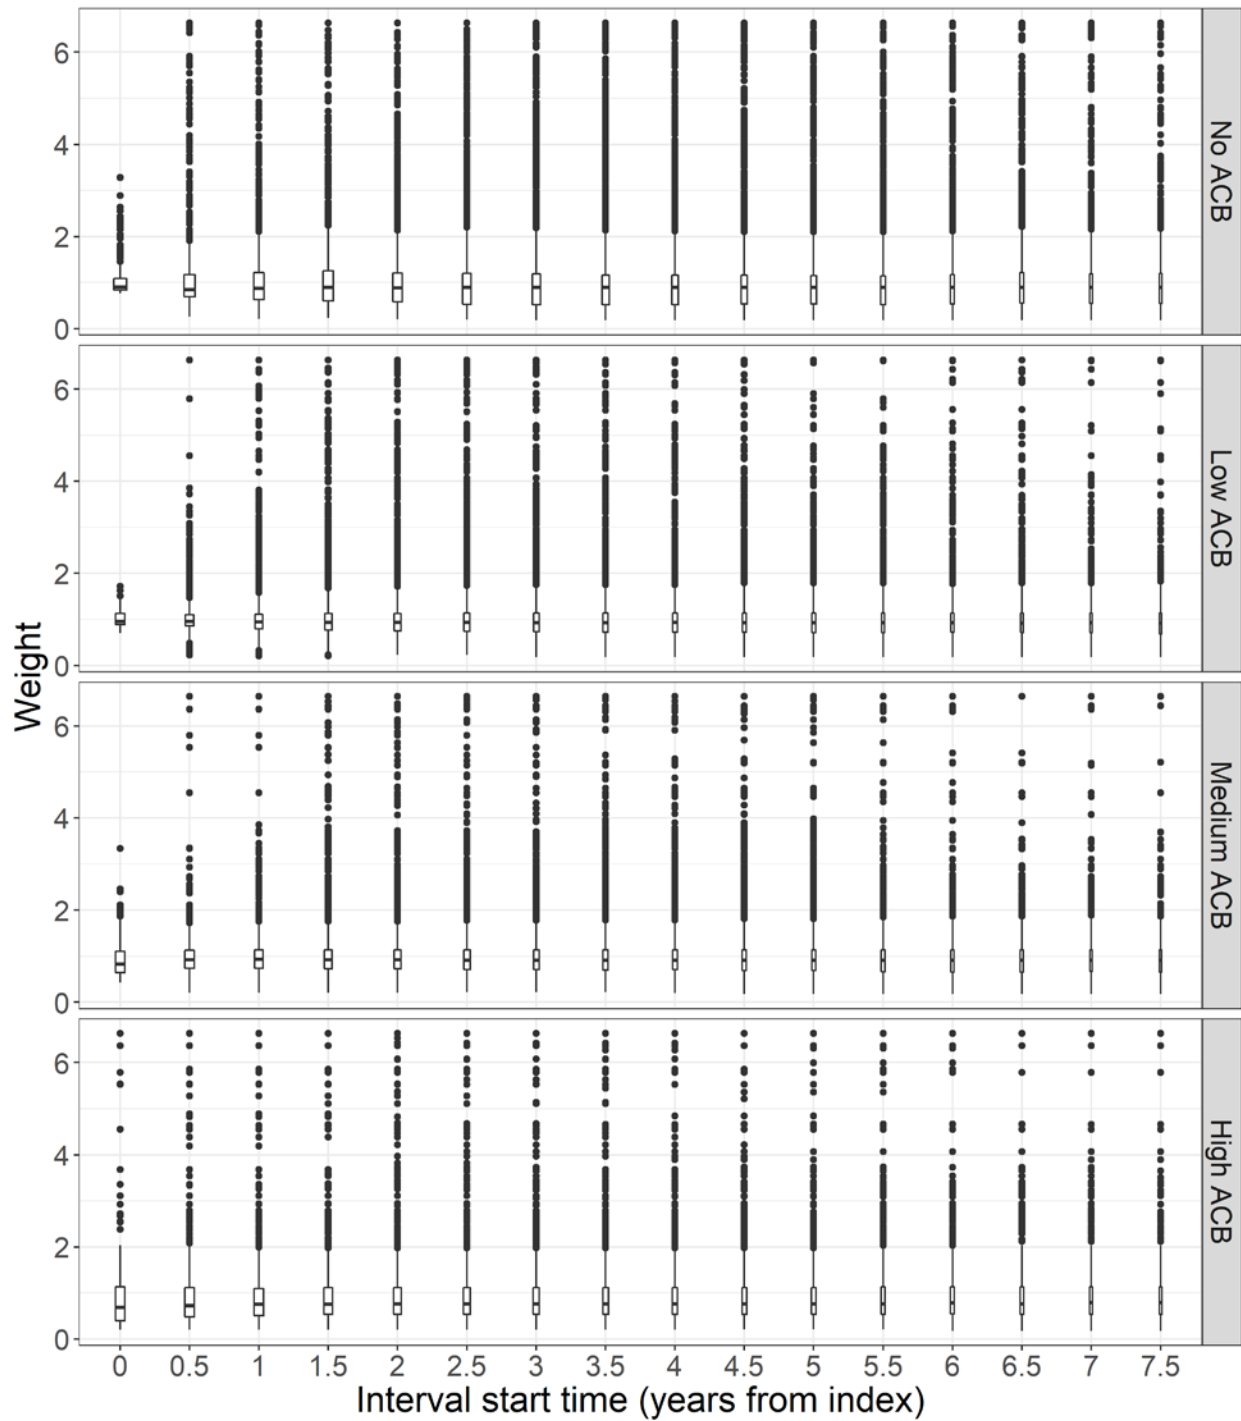

ACB: anticholinergic burden.



**Supplementary Figure 3: Weights used in a marginal structural model for the association between falls and fractures and anticholinergic burden, adjusted for important confounders and OAB status (N = 130,449), Truven MarketScan databases 2007-2015**

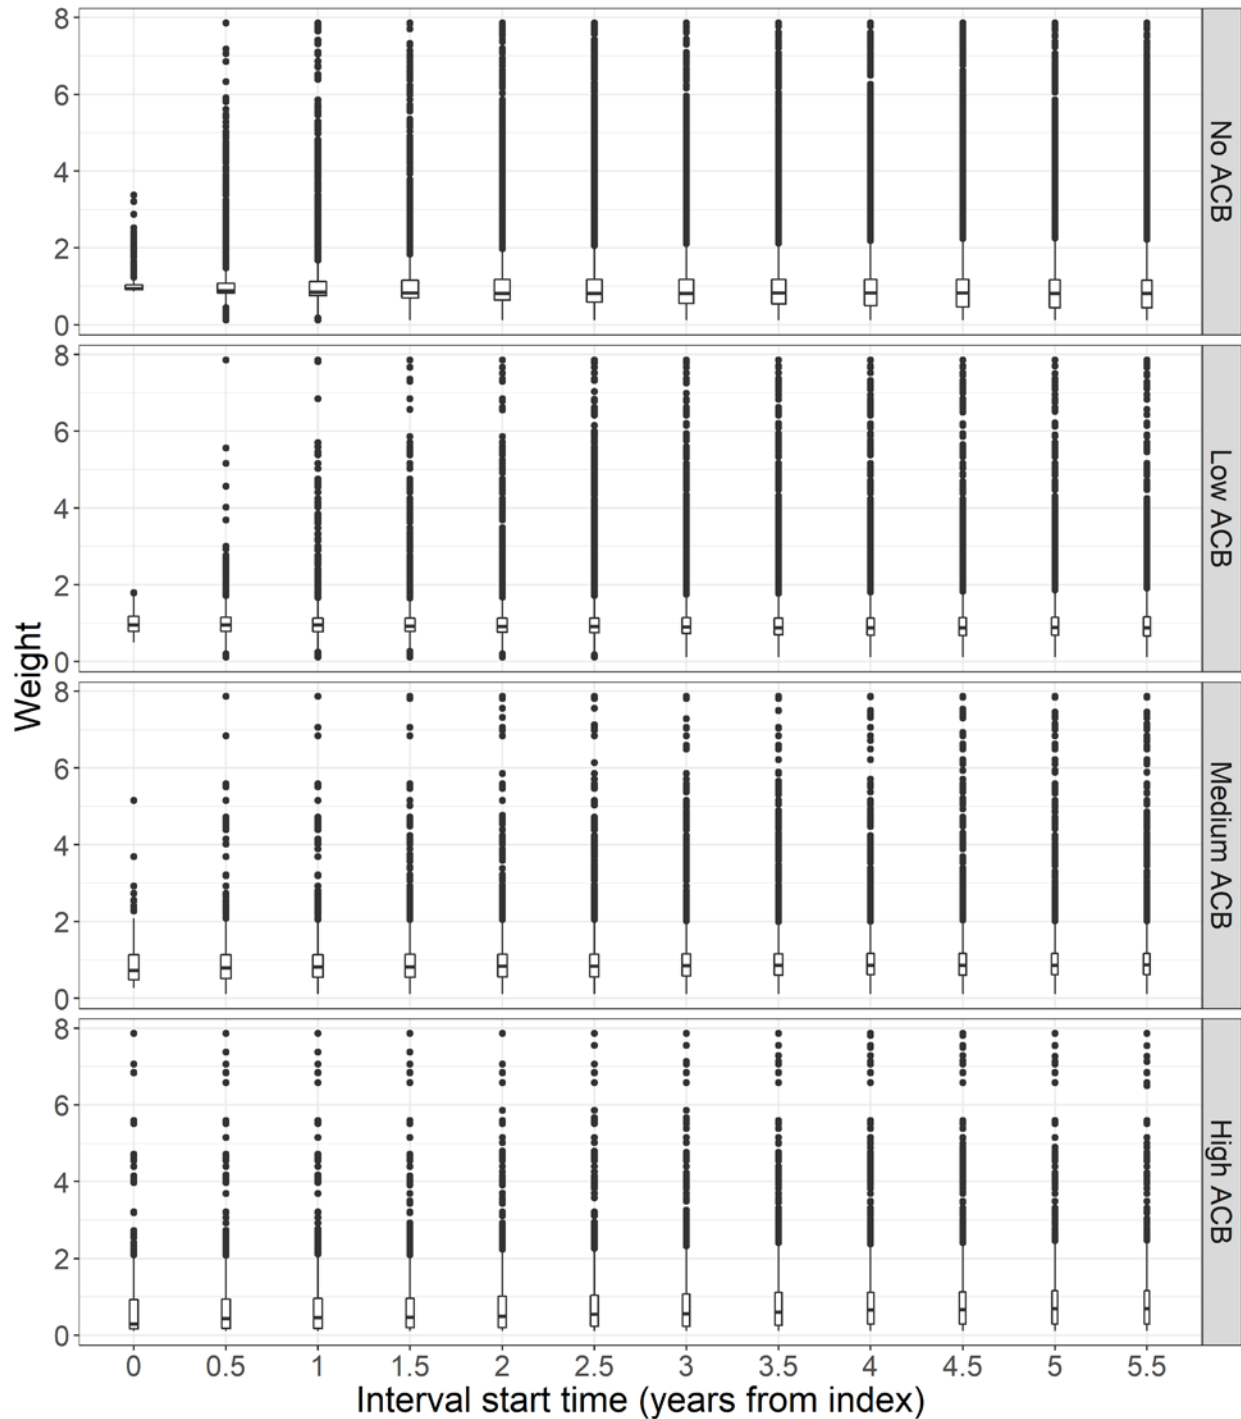

ACB: anticholinergic burden.

**Cumulative anticholinergic burden is associated with falls and fractures in overactive bladder: A retrospective cohort study**

Shelagh M. Szabo MSc, Katherine Gooch PhD, Carol R. Schermer MD MPH, David Walker PhD, Greta Lozano-Ortega MSc, Basia Rogula MSc, Alison Deighton BSc Edward Vonesh PhD, Noll L. Campbell PharmD MS.

STROBE Statement—Checklist of items that should be included in reports of *cohort studies*

|                              | Item No | Recommendation                                                                                                                                                                                    | ✓ Pg. No                               |
|------------------------------|---------|---------------------------------------------------------------------------------------------------------------------------------------------------------------------------------------------------|----------------------------------------|
| <b>Title and abstract</b>    | 1       | (a) Indicate the study's design with a commonly used term in the title or the abstract                                                                                                            | ✓ Pg. 1                                |
|                              |         | (b) Provide in the abstract an informative and balanced summary of what was done and what was found                                                                                               | ✓ Pg. 1                                |
| <b>Introduction</b>          |         |                                                                                                                                                                                                   |                                        |
| Background/rationale         | 2       | Explain the scientific background and rationale for the investigation being reported                                                                                                              | ✓ Pg. 4                                |
| Objectives                   | 3       | State specific objectives, including any prespecified hypotheses                                                                                                                                  | ✓ Pg. 5                                |
| <b>Methods</b>               |         |                                                                                                                                                                                                   |                                        |
| Study design                 | 4       | Present key elements of study design early in the paper                                                                                                                                           | ✓ Pg. 5                                |
| Setting                      | 5       | Describe the setting, locations, and relevant dates, including periods of recruitment, exposure, follow-up, and data collection                                                                   | ✓ Pg. 5                                |
| Participants                 | 6       | (a) Give the eligibility criteria, and the sources and methods of selection of participants. Describe methods of follow-up                                                                        | ✓ Pg. 5                                |
|                              |         | (b) For matched studies, give matching criteria and number of exposed and unexposed                                                                                                               | ✓ pg.6                                 |
| Variables                    | 7       | Clearly define all outcomes, exposures, predictors, potential confounders, and effect modifiers. Give diagnostic criteria, if applicable                                                          | ✓ pg.7                                 |
| Data sources/<br>measurement | 8*      | For each variable of interest, give sources of data and details of methods of assessment (measurement). Describe comparability of assessment methods if there is more than one group              | ✓ Pg. 5                                |
| Bias                         | 9       | Describe any efforts to address potential sources of bias                                                                                                                                         | ✓ Pg.8,9                               |
|                              |         | <i>We varied multiple parameters in sensitivity analyses to assess the potential impact of bias and only reported the most important here (see also limitations section)</i>                      |                                        |
| Study size                   | 10      | Explain how the study size was arrived at                                                                                                                                                         | ✓ Pg.6,7                               |
| Quantitative variables       | 11      | Explain how quantitative variables were handled in the analyses. If applicable, describe which groupings were chosen and why                                                                      | ✓ Pg. 8                                |
| Statistical methods          | 12      | (a) Describe all statistical methods, including those used to control for confounding                                                                                                             | ✓ Pg. 8,9                              |
|                              |         | (b) Describe any methods used to examine subgroups and interactions                                                                                                                               | ✓ Pg. 9                                |
|                              |         | (c) Explain how missing data were addressed                                                                                                                                                       | n/a (incomplete records were excluded) |
|                              |         | (d) If applicable, explain how loss to follow-up was addressed                                                                                                                                    | n/a                                    |
|                              |         | (e) Describe any sensitivity analyses                                                                                                                                                             | ✓ Pg. 8,9                              |
| <b>Results</b>               |         |                                                                                                                                                                                                   |                                        |
| Participants                 | 13*     | (a) Report numbers of individuals at each stage of study—eg numbers potentially eligible, examined for eligibility, confirmed eligible, included in the study, completing follow-up, and analysed | ✓ Pg. 7,9                              |
|                              |         | (b) Give reasons for non-participation at each stage                                                                                                                                              | n/a                                    |

**Cumulative anticholinergic burden is associated with falls and fractures in overactive bladder: A retrospective cohort study**

Shelagh M. Szabo MSc, Katherine Gooch PhD, Carol R. Schermer MD MPH, David Walker PhD, Greta Lozano-Ortega MSc, Basia Rogula MSc, Alison Deighton BSc Edward Vonesh PhD, Noll L. Campbell PharmD MS.

|    |                          |                                                                                                                                                                                                                 |                       |
|----|--------------------------|-----------------------------------------------------------------------------------------------------------------------------------------------------------------------------------------------------------------|-----------------------|
| 1  |                          |                                                                                                                                                                                                                 |                       |
| 2  |                          |                                                                                                                                                                                                                 |                       |
| 3  |                          |                                                                                                                                                                                                                 |                       |
| 4  |                          | (c) Consider use of a flow diagram                                                                                                                                                                              | n/a                   |
| 5  | Descriptive data         | 14* (a) Give characteristics of study participants (eg demographic, clinical, social) and information on exposures and potential confounders                                                                    | ✓ Pg. 9,10<br>Table 1 |
| 6  |                          |                                                                                                                                                                                                                 |                       |
| 7  |                          | (b) Indicate number of participants with missing data for each variable of interest                                                                                                                             | n/a                   |
| 8  |                          |                                                                                                                                                                                                                 |                       |
| 9  |                          | (c) Summarise follow-up time (eg, average and total amount)                                                                                                                                                     | ✓ Pg. 5               |
| 10 |                          |                                                                                                                                                                                                                 |                       |
| 11 |                          | <i>Minimum 1 year, up to 8 years, impact of varying follow up times was directly incorporated into analyses</i>                                                                                                 |                       |
| 12 |                          |                                                                                                                                                                                                                 |                       |
| 13 |                          |                                                                                                                                                                                                                 |                       |
| 14 |                          |                                                                                                                                                                                                                 |                       |
| 15 | Outcome data             | 15 Report numbers of outcome events or summary measures over time                                                                                                                                               | ✓ Pg. 10              |
| 16 |                          |                                                                                                                                                                                                                 |                       |
| 17 | Main results             | 16 (a) Give unadjusted estimates and, if applicable, confounder-adjusted estimates and their precision (eg, 95% confidence interval). Make clear which confounders were adjusted for and why they were included | ✓ Pg. 10-12           |
| 18 |                          |                                                                                                                                                                                                                 |                       |
| 19 |                          | (b) Report category boundaries when continuous variables were categorized                                                                                                                                       | ✓ Pg. 7-8             |
| 20 |                          | (c) If relevant, consider translating estimates of relative risk into absolute risk for a meaningful time period                                                                                                | ✓ Tables 2 & 3        |
| 21 |                          |                                                                                                                                                                                                                 |                       |
| 22 |                          |                                                                                                                                                                                                                 |                       |
| 23 |                          |                                                                                                                                                                                                                 |                       |
| 24 |                          |                                                                                                                                                                                                                 |                       |
| 25 |                          |                                                                                                                                                                                                                 |                       |
| 26 |                          |                                                                                                                                                                                                                 |                       |
| 27 | Other analyses           | 17 Report other analyses done—eg analyses of subgroups and interactions, and sensitivity analyses                                                                                                               | ✓ pg. 11              |
| 28 |                          |                                                                                                                                                                                                                 |                       |
| 29 |                          |                                                                                                                                                                                                                 |                       |
| 30 | <b>Discussion</b>        |                                                                                                                                                                                                                 |                       |
| 31 | Key results              | 18 Summarise key results with reference to study objectives                                                                                                                                                     | ✓ pg. 12              |
| 32 | Limitations              | 19 Discuss limitations of the study, taking into account sources of potential bias or imprecision. Discuss both direction and magnitude of any potential bias                                                   | ✓ pg. 13              |
| 33 |                          |                                                                                                                                                                                                                 |                       |
| 34 |                          |                                                                                                                                                                                                                 |                       |
| 35 |                          |                                                                                                                                                                                                                 |                       |
| 36 | Interpretation           | 20 Give a cautious overall interpretation of results considering objectives, limitations, multiplicity of analyses, results from similar studies, and other relevant evidence                                   | ✓ pg. 14              |
| 37 |                          |                                                                                                                                                                                                                 |                       |
| 38 |                          |                                                                                                                                                                                                                 |                       |
| 39 |                          |                                                                                                                                                                                                                 |                       |
| 40 | Generalisability         | 21 Discuss the generalisability (external validity) of the study results                                                                                                                                        | ✓ pg. 14              |
| 41 |                          |                                                                                                                                                                                                                 |                       |
| 42 | <b>Other information</b> |                                                                                                                                                                                                                 |                       |
| 43 | Funding                  | 22 Give the source of funding and the role of the funders for the present study and, if applicable, for the original study on which the present article is based                                                | ✓ Pg. 20              |
| 44 |                          |                                                                                                                                                                                                                 |                       |
| 45 |                          |                                                                                                                                                                                                                 |                       |
| 46 |                          |                                                                                                                                                                                                                 |                       |
| 47 |                          |                                                                                                                                                                                                                 |                       |
| 48 |                          |                                                                                                                                                                                                                 |                       |
| 49 |                          |                                                                                                                                                                                                                 |                       |
| 50 |                          |                                                                                                                                                                                                                 |                       |
| 51 |                          |                                                                                                                                                                                                                 |                       |
| 52 |                          |                                                                                                                                                                                                                 |                       |
| 53 |                          |                                                                                                                                                                                                                 |                       |
| 54 |                          |                                                                                                                                                                                                                 |                       |
| 55 |                          |                                                                                                                                                                                                                 |                       |
| 56 |                          |                                                                                                                                                                                                                 |                       |
| 57 |                          |                                                                                                                                                                                                                 |                       |
| 58 |                          |                                                                                                                                                                                                                 |                       |
| 59 |                          |                                                                                                                                                                                                                 |                       |
| 60 |                          |                                                                                                                                                                                                                 |                       |
